# Supplementary material for: Efficient copper-catalyzed domino synthesis of tetrazoloisoquinolines
Source: Royal Society of Chemistry journal article supplement (doi:10.1039/c3ra23230a), 2013-01-01

## Supporting Information

### Efficient copper-catalyzed domino synthesis of tetrazoloisoquinolines

Liangliang Shi,<sup>a</sup> Ruji Wang,<sup>a</sup> Haijun Yang,<sup>a</sup> Yuyang Jiang<sup>b</sup> and Hua Fu<sup>\*a,b</sup>

<sup>a</sup> Key Laboratory of Bioorganic Phosphorus Chemistry and Chemical Biology (Ministry of Education), Department of Chemistry, Tsinghua University, Beijing 100084, P. R. China. Fax: (+86) 10-62781695. E-mail: fuhua@mail.tsinghua.edu.cn

<sup>b</sup> Key Laboratory of Chemical Biology (Guangdong Province), Graduate School of Shenzhen, Tsinghua University, Shenzhen 518057, P. R. China

#### Table of contents

|                                                                             |     |
|-----------------------------------------------------------------------------|-----|
| General experimental procedures                                             | P2  |
| General procedure for synthesis of compounds <b>3a-t</b>                    | P2  |
| Characterization data of compounds <b>3a-t</b>                              | P2  |
| Crystal preparation and X-ray diffraction analysis of compound <b>3h</b>    | P8  |
| References                                                                  | P12 |
| The <sup>1</sup> H and <sup>13</sup> C NMR spectra of compounds <b>3a-t</b> | P14 |

## General experimental procedures

All reactions were carried out under nitrogen atmosphere. Proton and carbon magnetic resonance spectra ( $^1\text{H}$  NMR and  $^{13}\text{C}$  NMR) were recorded using tetramethylsilane (TMS) in the solvent of  $\text{CDCl}_3$  as the internal standard ( $^1\text{H}$  NMR: TMS at 0.00 ppm,  $\text{CDCl}_3$  at 7.26 ppm;  $^{13}\text{C}$  NMR:  $\text{CDCl}_3$  at 77.26 ppm).

## General procedure for synthesis of compounds 3a-t

Substituted 5-(2-halophenyl)-1*H*-tetrazole (**1**) (0.25 mmol), alkynes (**2**) (0.5 mmol), CuI (0.025 mmol, 5 mg), NaOAc (0.5 mmol, 41 mg) or  $\text{K}_2\text{CO}_3$  (0.5 mmol, 69 mg) (see Table 2) and DMSO (2.5 mL) were added to a round bottom flask with a magnetic stirrer. The mixture was allowed to stir under nitrogen atmosphere at 100 °C for 24 h. After completion of the reaction, the resulting solution was cooled to room temperature, and the solution was removed with the aid of a rotary evaporator. The residue was purified by column chromatography on silica gel using petroleum ether/ethyl acetate (3:1) as eluent to provide the desired product (**3**).

## Characterization data of compounds 3a-t

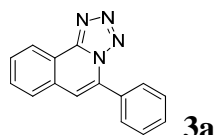

**3a.**<sup>1</sup> Eluent: petroleum ether/ethyl acetate (3:1). 5-Phenyltetrazolo[5,1-*a*]isoquinoline (54 mg, 88%) using 5-(2-bromophenyl)-1*H*-tetrazole (**1a**); (44 mg, 72%) using 5-(2-chlorophenyl)-1*H*-tetrazole (**1g**). Light yellow solid, mp 216-219 °C (lit.<sup>1</sup> 210-211 °C).  $^1\text{H}$  NMR ( $\text{CDCl}_3$ , 300 MHz)  $\delta$  8.81 (d, 1H,  $J = 6.9$  Hz), 8.02 – 7.94 (m, 3H), 7.89-7.81 (m, 2H), 7.60- 7.56 (m, 3H), 7.49 (s, 1H).  $^{13}\text{C}$  NMR ( $\text{CDCl}_3$ , 75 MHz)  $\delta$  148.9, 135.4, 132.5, 131.9, 131.4, 130.7, 129.6, 129.4, 129.1, 127.7, 125.4, 119.3, 116.6. ESI-MS:  $[\text{M}+\text{H}]^+$   $m/z$  247.2.

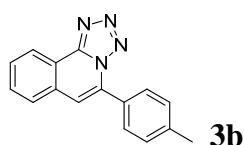

**3b.**<sup>1</sup> Eluent: petroleum ether/ethyl acetate (3:1). 5-(*p*-Tolyl)tetrazolo[5,1-*a*]isoquinoline (54 mg, 82%). Light yellow solid, mp 213-215

°C (lit.<sup>1</sup> 210-211 °C). <sup>1</sup>H NMR (CDCl<sub>3</sub>, 300 MHz) δ 8.79 (d, 1H, *J* = 7.2 Hz), 7.94-7.78 (m, 5H), 7.44 (s, 1H), 7.40 (s, 1H), 7.37 (s, 1H), 2.47 (s, 3H). <sup>13</sup>C NMR (CDCl<sub>3</sub>, 75 MHz) δ 148.9, 141.0, 135.4, 132.5, 131.9, 129.8, 129.3, 129.2, 128.5, 127.6, 125.3, 119.1, 116.1, 21.8. ESI-MS: [M+H]<sup>+</sup> *m/z* 261.1.

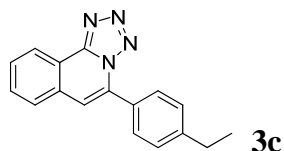

**3c.** Eluent: petroleum ether/ethyl acetate (3:1).  
5-(4-Ethylphenyl)tetrazolo[5,1-*a*]isoquinoline (60 mg, 87%) using  
5-(2-bromophenyl)-1*H*-tetrazole (**1a**); (43 mg, 63%) using  
5-(2-chlorophenyl)-1*H*-tetrazole (**1g**). Light yellow solid, mp 134-136 °C. <sup>1</sup>H NMR (CDCl<sub>3</sub>, 300 MHz) δ 8.77 (td, 1H, *J* = 8.1 Hz, *J* = 1.7 Hz), 8.92-7.90 (m, 3H), 7.84 - 7.74 (m, 2H), 7.44 (s, 1H), 7.42 (s, 1H), 7.39 (s, 1H), 2.76 (q, 2H, *J* = 7.6 Hz), 1.32 (t, 3H, *J* = 7.6 Hz). <sup>13</sup>C NMR (CDCl<sub>3</sub>, 75 MHz) δ 148.8, 147.3, 135.4, 132.5, 131.9, 129.3, 128.7, 128.6, 127.6, 125.3, 119.1, 116.1, 29.0, 15.6. HR-MS (ESI): [M+H]<sup>+</sup> *m/z* calcd for (C<sub>17</sub>H<sub>14</sub>N<sub>4</sub>+H<sup>+</sup>) 275.1297, found 275.1293.

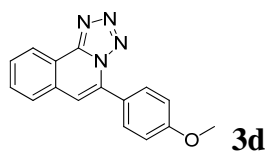

**3d.<sup>1</sup>** Eluent: petroleum ether/ethyl acetate (3:1).  
5-(4-Methoxyphenyl)tetrazolo[5,1-*a*]isoquinoline (62 mg, 90%) Light yellow solid,  
mp 198-200 °C (lit.<sup>1</sup> 195-196 °C). <sup>1</sup>H NMR (CDCl<sub>3</sub>, 300 MHz) δ 8.78 (d, 1H, *J* = 7.2 Hz), 7.99 (s, 1H), 7.96 (s, 1H), 7.92 (d, 1H, *J* = 7.6 Hz), 7.83-7.77 (m, 2H), 7.42 (s, 1h), 7.11 (s, 1h), 7.08 (s, 1h), 3.91 (s, 3H). <sup>13</sup>C NMR (CDCl<sub>3</sub>, 75 MHz) δ 161.5, 148.9, 135.2, 132.6, 131.9, 130.9, 129.2, 127.5, 125.4, 123.4, 119.0, 115.6, 114.5, 55.7. ESI-MS: [M+H]<sup>+</sup> *m/z* 277.1.

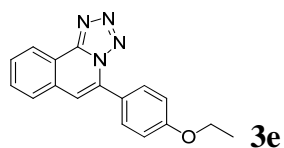

**3e.** Eluent: petroleum ether/ethyl acetate (3:1).  
5-(4-Ethoxyphenyl)tetrazolo[5,1-*a*]isoquinoline (63 mg, 86%) using

5-(2-bromophenyl)-1*H*-tetrazole (**1a**); (51 mg, 68%) using 5-(2-chlorophenyl)-1*H*-tetrazole (**1g**). Light yellow solid, mp 171-173 °C. <sup>1</sup>H NMR (CDCl<sub>3</sub>, 300 MHz) δ 8.76 (dd, 1H, *J* = 8.1 Hz, *J* = 1.2 Hz), 7.96-7.89 (m, 3H), 7.83-7.73 (m, 2H), 7.41 (s, 1H), 7.08 (s, 1H), 7.05 (s, 1H), 4.13 (q, 2H, *J* = 6.9 Hz), 1.47 (t, 3H, *J* = 6.9 Hz). <sup>13</sup>C NMR (CDCl<sub>3</sub>, 75 MHz) δ 160.9, 148.9, 135.2, 132.6, 131.9, 130.8, 129.2, 127.5, 125.3, 123.4, 118.9, 115.4, 114.9, 63.9, 15.0. HR-MS (ESI): [M+Na]<sup>+</sup> *m/z* calcd for (C<sub>17</sub>H<sub>14</sub>N<sub>4</sub>O+Na<sup>+</sup>) 313.1065, found 313.1058.

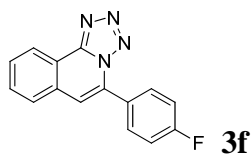

**3f.** Eluent: petroleum ether/ethyl acetate (3:1). 5-(4-Fluorophenyl)tetrazolo[5,1-*a*]isoquinoline (62 mg, 94%). Light yellow solid, mp 243-245 °C. <sup>1</sup>H NMR (CDCl<sub>3</sub>, 300 MHz) δ 8.81 (d, 1H, *J* = 6.9 Hz), 7.86-7.83 (m, 3H), 7.86-7.836 (m, 2H), 7.47 (s, 1H), 7.30-7.28 (m, 2H). <sup>13</sup>C NMR (CDCl<sub>3</sub>, 75 MHz) δ 164.2 (*J* = 254.0 Hz), 148.9, 134.3, 132.4, 132.0, 131.6 (*J* = 8.6 Hz), 129.7, 127.7, 125.5, 119.3, 116.5, 116.4, 116.3. HR-MS (ESI): [M+Na]<sup>+</sup> *m/z* calcd for (C<sub>15</sub>H<sub>9</sub>FN<sub>4</sub>+Na<sup>+</sup>) 287.0709, found 287.0698.

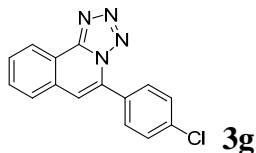

**3g.** Eluent: petroleum ether/ethyl acetate (3:1). 5-(4-Chlorophenyl)tetrazolo[5,1-*a*]isoquinoline (65 mg, 93%). Light yellow solid, mp 236-238 °C. <sup>1</sup>H NMR (CDCl<sub>3</sub>, 300 MHz) δ 8.81 (d, 1H, *J* = 6.9 Hz), 7.98-7.94 (m, 3H), 7.89-7.81 (m, 2H), 7.89 (s, 1H), 7.56 (s, 1H), 7.48 (s, 1H). <sup>13</sup>C NMR (CDCl<sub>3</sub>, 75 MHz) δ 148.9, 136.9, 134.2, 133.9, 132.3, 132.1, 130.7, 129.8, 129.4, 127.8, 125.5, 119.4, 116.7. HR-MS (ESI): [M+Na]<sup>+</sup> *m/z* calcd for (C<sub>15</sub>H<sub>9</sub>ClN<sub>4</sub>+Na<sup>+</sup>) 303.0413, found 313.0404.

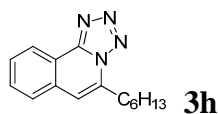

**3h.** Eluent: petroleum ether/ethyl acetate (3:1). 5-Hexyltetrazolo[5,1-*a*]isoquinoline

(53 mg, 83%) using 5-(2-bromophenyl)-1*H*-tetrazole (**1a**); (23 mg, 36%) using 5-(2-chlorophenyl)-1*H*-tetrazole (**1g**). White solid, mp 101-103 °C. <sup>1</sup>H NMR (CDCl<sub>3</sub>, 300 MHz) δ 8.66 (dd, 1H, *J* = 7.9 Hz, *J* = 0.7 Hz), 7.81-7.66 (m, 3H), 7.12 (s, 1H), 3.24 (t, 2H, *J* = 7.7 Hz), 1.94-1.84 (m, 2H), 1.47-1.21 (m, 6H), 0.86 (t, 3H, *J* = 7.1 Hz). <sup>13</sup>C NMR (CDCl<sub>3</sub>, 75 MHz) δ 148.2, 136.3, 132.3, 131.6, 128.7, 127.0, 125.0, 118.7, 111.5, 31.6, 31.0, 29.0, 26.9, 22.7, 14.2. HR-MS (ESI): [M+Na]<sup>+</sup> *m/z* calcd for (C<sub>15</sub>H<sub>18</sub>N<sub>4</sub>+Na<sup>+</sup>) 277.1429, found 277.1422.

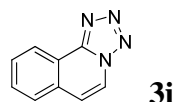

**3i.**<sup>2</sup> Eluent: petroleum ether/ethyl acetate (3:1). Tetrazolo[5,1-*a*]isoquinoline (23 mg, 52%). White solid, mp 139-141 °C (lit.<sup>2</sup> 141-142 °C). <sup>1</sup>H NMR (CDCl<sub>3</sub>, 300 MHz) δ 8.78-8.74 (m, 1H), 8.56 (d, 1H, *J* = 7.2 Hz), 7.95-7.92 (m, 1H), 7.45 (d, 1H, *J* = 7.2 Hz). <sup>13</sup>C NMR (CDCl<sub>3</sub>, 75 MHz) δ 148.2, 131.9, 130.0, 127.9, 125.3, 121.3, 120.0, 117.9. ESI-MS: [M+H]<sup>+</sup> *m/z* 171.2.

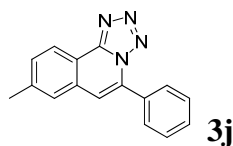

**3j.** Eluent: petroleum ether/ethyl acetate (3:1). 8-Methyl-5-phenyltetrazolo[5,1-*a*]isoquinoline (57mg, 88%) using 5-(2-bromo-4-methylphenyl)-1*H*-tetrazole (**1b**); (43mg, 66%) using 5-(2-chloro-4-methylphenyl)-1*H*-tetrazole (**1h**). Light yellow solid, mp 189-191 °C. <sup>1</sup>H NMR (CDCl<sub>3</sub>, 300 MHz) δ 8.59 (d, 1H, *J* = 8.3 Hz), 7.97-7.94 (m, 2H), 7.65 (s, 1H), 7.57-7.52 (m, 4H), 7.35 (s, 1H), 2.56 (s, 3H). <sup>13</sup>C NMR (CDCl<sub>3</sub>, 75 MHz) δ 148.7, 142.6, 135.1, 132.5, 131.4, 131.1, 130.5, 129.2, 128.9, 127.3, 124.9, 116.8, 116.3, 22.1. HR-MS (ESI): [M+Na]<sup>+</sup> *m/z* calcd for (C<sub>16</sub>H<sub>12</sub>N<sub>4</sub>+Na<sup>+</sup>) 283.0960, found 283.0950.

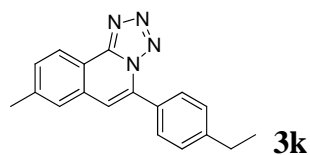

**3k.** Eluent: petroleum ether/ethyl acetate (3:1).

5-(4-Ethylphenyl)-8-methyltetrazolo[5,1-*a*]isoquinoline (61 mg, 85%) using 5-(2-bromo-4-methylphenyl)-1*H*-tetrazole (**1b**); (41 mg, 7%) using 5-(2-chloro-4-methylphenyl)-1*H*-tetrazole (**1h**). Light yellow solid, mp 158-160 °C. <sup>1</sup>H NMR (CDCl<sub>3</sub>, 300 MHz) δ 8.59 (d, 1H, *J* = 8.3 Hz), 7.89 (s, 1H), 7.87 (s, 1H), 7.63 (s, 1H), 7.55 (d, 1H, *J* = 8.3 Hz), 7.39 (s, 1H), 7.36 (s, 1H), 7.33 (s, 1H), 2.75 (q, 2H, *J* = 7.6 Hz), 2.56 (s, 3H), 1.31 (t, 3H, *J* = 7.6 Hz). <sup>13</sup>C NMR (CDCl<sub>3</sub>, 75 MHz) δ 148.7, 147.1, 142.5, 135.2, 132.6, 130.9, 129.2, 128.7, 128.5, 127.2, 124.9, 116.7, 115.8, 28.9, 22.1, 15.5. HR-MS (ESI): [M+Na]<sup>+</sup> *m/z* calcd for (C<sub>18</sub>H<sub>16</sub>N<sub>4</sub>+Na<sup>+</sup>) 311.1273, found 311.1264.

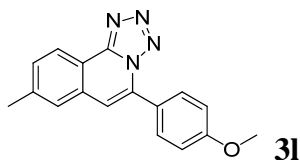

**3l.** Eluent: petroleum ether/ethyl acetate (3:1). 5-(4-Methoxyphenyl)-8-methyltetrazolo[5,1-*a*]isoquinoline (63 mg, 86%). Light yellow solid, mp 208-210 °C. <sup>1</sup>H NMR (CDCl<sub>3</sub>, 300 MHz) δ 8.62 (d, 1H, *J* = 8.6 Hz), 7.95 (s, 1H), 7.93 (s, 1H), 7.93 (s, 1H), 7.66 (s, 1H), 7.57 (d, 1H, *J* = 8.3 Hz), 7.32 (s, 1H), 7.08 (s, 1H), 7.06 (s, 1H), 3.90 (s, 3H), 2.58 (s, 3H). <sup>13</sup>C NMR (CDCl<sub>3</sub>, 75 MHz) δ 161.4, 148.8, 142.5, 135.1, 132.8, 130.8, 127.2, 125.1, 123.8, 116.7, 115.3, 114.5, 55.7, 22.2. HR-MS (ESI): [M+Na]<sup>+</sup> *m/z* calcd for (C<sub>17</sub>H<sub>14</sub>N<sub>4</sub>O+Na<sup>+</sup>) 313.1065, found 313.1054.

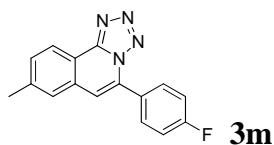

**3m.** Eluent: petroleum ether/ethyl acetate (3:1). 5-(4-Fluorophenyl)-8-methyltetrazolo[5,1-*a*]isoquinoline (63 mg, 91%). Light yellow solid, mp 235-237 °C. <sup>1</sup>H NMR (CDCl<sub>3</sub>, 300 MHz) δ 8.67 (d, 1H, *J* = 7.6 Hz), 8.01-7.99 (m, 2H), 7.72 (s, 1H), 7.63 (d, 1H, *J* = 8.3 Hz), 7.37 (s, 1H), 7.29-7.26 (m, 2H), 2.61 (s, 3H). <sup>13</sup>C NMR (CDCl<sub>3</sub>, 75 MHz) δ 164.1 (*J* = 254.1 Hz), 148.9, 142.8, 134.2, 132.6, 131.5, 131.4, 131.3, 127.4, 125.3, 117.0, 116.3, 116.2, 22.2. HR-MS (ESI): [M+Na]<sup>+</sup> *m/z* calcd for (C<sub>16</sub>H<sub>11</sub>FN<sub>4</sub>+Na<sup>+</sup>) 301.0865, found 301.0859.

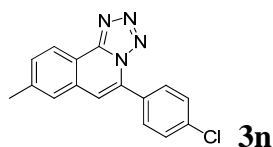

**3n.** Eluent: petroleum ether/ethyl acetate (3:1).

5-(4-Chlorophenyl)-8-methyltetrazolo[5,1-*a*]isoquinoline (68 mg, 93%). Light yellow solid, mp 219-221 °C. <sup>1</sup>H NMR (CDCl<sub>3</sub>, 300 MHz) δ 8.66 (d, 1H, *J* = 8.3 Hz), 7.96 (s, 1H), 7.95 (s, 1H), 7.72 (s, 1H), 7.63 (d, 1H, *J* = 8.3 Hz), 7.57 (s, 1H), 7.54 (s, 1H), 7.40 (s, 1H), 2.61 (s, 3H). <sup>13</sup>C NMR (CDCl<sub>3</sub>, 75 MHz) δ 148.9, 142.8, 136.8, 134.1, 133.9, 132.5, 131.5, 130.6, 129.4, 127.5, 125.3, 117.1, 116.5, 22.3. HR-MS (ESI): [M+Na]<sup>+</sup> *m/z* calcd for (C<sub>16</sub>H<sub>11</sub>ClN<sub>4</sub>+Na<sup>+</sup>) 317.0570, found 317.0560.

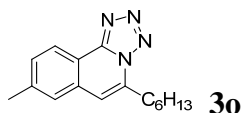

**3o.** Eluent: petroleum ether/ethyl acetate (3:1).

5-Hexyl-8-methyltetrazolo[5,1-*a*]isoquinoline (59 mg, 88%) using 5-(2-bromo-4-methylphenyl)-1H-tetrazole (**1b**); (22 mg, 32%) using 5-(2-chloro-4-methylphenyl)-1H-tetrazole (**1h**). White solid, mp 86-88 °C. <sup>1</sup>H NMR (CDCl<sub>3</sub>, 300 MHz) δ 8.47 (d, 1H, *J* = 7.9 Hz), 7.51 (s, 1H), 7.44 (dd, 1H, *J* = 8.1 Hz, *J* = 1.2 Hz), 6.97 (s, 1H), 3.16 (t, 3H, *J* = 7.6 Hz), 1.88-1.77 (m, 2H), 1.39-1.31 (m, 6H), 0.81 (t, 3H, *J* = 7.1 Hz). <sup>13</sup>C NMR (CDCl<sub>3</sub>, 75 MHz) δ 148.2, 142.2, 136.2, 132.5, 130.3, 126.7, 124.9, 116.5, 114.3, 31.6, 30.9, 29.1, 26.9, 22.7, 22.1, 14.2. HR-MS (ESI): [M+Na]<sup>+</sup> *m/z* calcd for (C<sub>16</sub>H<sub>20</sub>N<sub>4</sub>+Na<sup>+</sup>) 291.1586, found 291.1573.

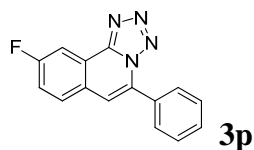

**3p.** Eluent: petroleum ether/ethyl acetate (3:1).

9-Fluoro-5-phenyltetrazolo[5,1-*a*]isoquinoline (48 mg, 72%). Light yellow solid, mp 229-231 °C. <sup>1</sup>H NMR (CDCl<sub>3</sub>, 300 MHz) δ 8.45 (dd, 1H, *J* = 8.4 Hz, *J* = 2.6 Hz), 8.00-7.95 (m, 3H), 7.63-7.56 (m, 4H), 7.48 (s, 1H). <sup>13</sup>C NMR (CDCl<sub>3</sub>, 75 MHz) δ 162.6 (*J* = 252.1 Hz), 148.5, 134.8, 131.1, 130.8, 130.3 (*J* = 9.4 Hz), 129.4, 129.2, 121.5 (*J* = 23.8 Hz), 120.8 (*J* = 10.1 Hz), 115.9, 111.2, 110.8. HR-MS (ESI): [M+Na]<sup>+</sup>

m/z calcd for (C<sub>15</sub>H<sub>9</sub>FN<sub>4</sub>+Na<sup>+</sup>) 287.0709, found 287.0702.

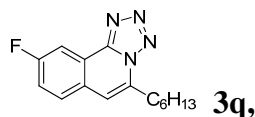

**3q.** Eluent: petroleum ether/ethyl acetate (3:1).

9-Fluoro-5-hexyltetrazolo[5,1-*a*]isoquinoline (60 mg, 88%). White solid, mp 113-115 °C. <sup>1</sup>H NMR (CDCl<sub>3</sub>, 300 MHz) δ 8.35 (dd, 1H, *J* = 8.3 Hz, *J* = 2.6 Hz), 7.87 (q, 1H, *J* = 3.4 Hz), 7.54 (td, 1H *J* = 8.6 Hz), 7.17 (s, 1H), 3.28 (t, 2H, *J* = 7.7 Hz), 1.99-1.88 (m, 2H, ), 1.52-1.31 (m, 6H), 0.91 (t, 3H, *J* = 7.1 Hz). <sup>13</sup>C NMR (CDCl<sub>3</sub>, 75 MHz) δ 162.1 (*J* = 252.4 Hz), 147.9, 135.8, 129.6 (*J* = 9.4 Hz), 120.7 (*J* = 23.8 Hz), 120.2 (*J* = 10.1 Hz), 113.9, 110.8, 110.5, 31.6, 30.9, 29.1, 26.9, 22.7, 14.2. HR-MS (ESI): [M+Na]<sup>+</sup> m/z calcd for (C<sub>15</sub>H<sub>17</sub>FN<sub>4</sub>+Na<sup>+</sup>) 295.1335, found 295.1328.

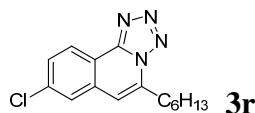

**3r.** Eluent: petroleum ether/ethyl acetate (3:1).

8-Chloro-5-hexyltetrazolo[5,1-*a*]isoquinoline (36 mg, 49%). White solid, mp 129-131 °C. <sup>1</sup>H NMR (CDCl<sub>3</sub>, 300 MHz) δ 8.67 (d, 1H, *J* = 8.3 Hz), 7.85 (d, 1H, *J* = 2.1 Hz), 7.71 (dd, 1H, *J* = 8.6 Hz, *J* = 2.1 Hz), 7.09 (s, 1H), 3.30 (t, 3H, *J* = 7.6 Hz), 1.96-1.91 (m, 2H), 1.51-1.47 (m, 2H), 1.39-1.32 (m, 4H), 0.91 (t, 3H, *J* = 7.2 Hz). <sup>13</sup>C NMR (CDCl<sub>3</sub>, 75 MHz) δ 148.0, 138.0, 137.9, 133.5, 129.5, 126.8, 126.4, 117.2, 113.4, 31.6, 31.1, 29.1, 26.9, 22.7, 14.3. HR-MS (ESI): [M+Na]<sup>+</sup> m/z calcd for (C<sub>15</sub>H<sub>17</sub>ClN<sub>4</sub>+Na<sup>+</sup>) 311.1039, found 311.1034.

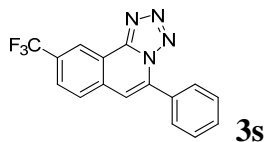

**3s.** Eluent: petroleum ether/ethyl acetate (3:1).

5-Phenyl-9-(trifluoromethyl)tetrazolo[5,1-*a*]isoquinoline (62 mg, 79%). Light yellow solid, mp 239-241 °C. <sup>1</sup>H NMR (CDCl<sub>3</sub>, 300 MHz) δ 9.13 (s, 1H), 8.09-8.01 (m, 4H), 7.64-7.62 (m, 3H), 7.55 (s, 1H). <sup>13</sup>C NMR (CDCl<sub>3</sub>, 75 MHz) δ 148.6, 137.5, 134.5, 131.3, 130.7, 129.5, 129.3, 128.9 (d, *J* = 39.4 Hz), 128.6, 128.1, 123.7 (q, *J* = 273.1 Hz), 123.1, 119.1, 115.6. HR-MS (ESI): [M+Na]<sup>+</sup> m/z calcd for (C<sub>16</sub>H<sub>9</sub>F<sub>3</sub>N<sub>4</sub>+Na<sup>+</sup>)



337.0677, found 337.0668.

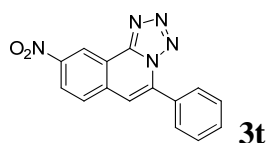

**3t.** Eluent: petroleum ether/ethyl acetate (3:1).  
9-Nitro-5-phenyltetrazolo[5,1-*a*]isoquinoline (46 mg, 63%) using  
5-(2-bromo-5-nitrophenyl)-1*H*-tetrazole (**1f**); (42 mg, 56%) using  
5-(2-chloro-5-nitrophenyl)-1*H*-tetrazole (**1i**). Yellow solid, mp 231-233 °C. <sup>1</sup>H NMR  
(CDCl<sub>3</sub>, 300 MHz) δ 9.68 (d, 1H, *J* = 2.1 Hz), 8.64 (dd, 1H, *J* = 8.9 Hz, *J* = 2.1 Hz),  
8.14 (d, 1H, *J* = 8.9 Hz), 8.05-8.04 (m, 2H), 7.65-7.63(m, 2H), 7.59(s, 1H). <sup>13</sup>C NMR  
(CDCl<sub>3</sub>, 75 MHz) δ 148.7, 147.5, 138.8, 136.2, 131.7, 130.4, 129.5, 129.4, 129.3,  
125.9, 121.6, 119.3, 115.2. HR-MS (ESI): [M+Na]<sup>+</sup> *m/z* calcd for (C<sub>15</sub>H<sub>9</sub>N<sub>5</sub>O<sub>2</sub>+Na<sup>+</sup>)  
314.0654, found 314.0642.

#### Crystal preparation and X-ray diffraction analysis of compound 3h

**Crystal preparation of compound 3h.** Compound **3h** (30 mg) was dissolved in 10 mL of CHCl<sub>3</sub>, and it was crystallized to give crystal as colorless triclinic after the solvent was slowly volatilized in 2 days at room temperature (~ 25 °C). *The crystal structure has been deposited at the Cambridge Crystallographic Data Centre and allocated the deposition number (CCDC 913654).*

**X-Ray diffraction analysis of compound 3h.** The low temperature (103.6°K) single-crystal X-ray experiments were performed on a X calibur, Eos, Gemini diffractometer equipped with graphite monochromatized Mo K<sub>α</sub> radiation. Unit cell was obtained and refined by 4129 reflections with 3.4° < θ < 29.1°. No decay was observed except the statistic fluctuation in the data collection. Raw intensities were corrected for Lorentz and polarization effects. Direct phase determination yielded the positions of all non-hydrogen atoms. All non-hydrogen atoms were subjected to anisotropic refinement. All hydrogen atoms were generated geometrically with C-H bonds of 0.93-0.96 Å according to criteria described in the SHELXTL manual (Bruker, 1997). They were included in the refinement with U<sub>iso</sub>(H) = 1.2U<sub>eq</sub> (for C) and 1.5 U<sub>eq</sub> (for methyl). The final full-matrix least-square refinement on *F*<sup>2</sup> converged with *R*1 =

0.0532 and  $wR2 = 0.1358$  for 2588 observed reflections [ $I \geq 2\sigma(I)$ ]. The final difference electron density map shows no features. Details of crystal parameters, data collection and structure refinement are given in Table 1.

Data collection was controlled by CrysAlis<sup>Pro</sup> (Oxford, 2011).<sup>3</sup> Computations were performed using the SHELXTL NT ver. 5.10 program package (Bruker, 1997)<sup>4</sup> on an IBM PC computer. Analytic expressions of atomic scattering factors were employed, and anomalous dispersion corrections were incorporated (*International Tables for X-ray Crystallography*, 1989).<sup>5</sup> Crystal drawings were produced with XP (Bruker, 1998).

**Table 1** Crystal data and structure refinement for compound **3h**

|                                                                |                                                                                                                                                                                 |
|----------------------------------------------------------------|---------------------------------------------------------------------------------------------------------------------------------------------------------------------------------|
| Sample code                                                    | <b>EXP-1015</b>                                                                                                                                                                 |
| Molecular formula                                              | C <sub>15</sub> H <sub>18</sub> N <sub>4</sub>                                                                                                                                  |
| Molecular weight                                               | 254.33                                                                                                                                                                          |
| Temperature                                                    | 103.6 K                                                                                                                                                                         |
| Crystal system                                                 | triclinic                                                                                                                                                                       |
| Space group                                                    | <i>P</i> -1                                                                                                                                                                     |
| Unit cell parameters                                           | $a = 8.2705(16) \text{ \AA}$ $\alpha = 82.682^\circ(14)$<br>$b = 9.4515(14) \text{ \AA}$ $\beta = 64.188^\circ(19)$<br>$c = 9.4618(19) \text{ \AA}$ $\gamma = 85.910^\circ(14)$ |
| Density (calcd)                                                | 1.279 g/cm <sup>3</sup>                                                                                                                                                         |
| Volume/Å <sup>3</sup>                                          | 660.3(2)                                                                                                                                                                        |
| Z                                                              | 2                                                                                                                                                                               |
| $\mu / \text{mm}^{-1}$                                         | 0.079 mm <sup>-1</sup>                                                                                                                                                          |
| <i>F</i> (000)                                                 | 272                                                                                                                                                                             |
| Crystal size                                                   | 0.80 × 0.30 × 0.10 mm                                                                                                                                                           |
| 2 $\theta$ range for data collection                           | 6.82 to 52°                                                                                                                                                                     |
| Index range                                                    | -10 ≤ <i>h</i> ≤ 9, -11 ≤ <i>k</i> ≤ 11, -11 ≤ <i>l</i> ≤ 11;                                                                                                                   |
| Reflections collected                                          | 4129                                                                                                                                                                            |
| Independent reflections                                        | 2588[R(int) = 0.0328 (inf-0.9Å)]                                                                                                                                                |
| Data/restraints/parameters                                     | 2588/0/173                                                                                                                                                                      |
| Goodness-of-fit on F <sup>2</sup>                              | 1.055                                                                                                                                                                           |
| Final R indexes [ $I > 2\sigma(I)$ i.e. $F_o > 4\sigma(F_o)$ ] | R1 = 0.0532, wR2 = 0.1358                                                                                                                                                       |
| Final R indexes [all data]                                     | R1 = 0.0674, wR2 = 0.1483                                                                                                                                                       |
| Largest diff. peak/hole / e Å <sup>-3</sup>                    | 0.286/-0.341                                                                                                                                                                    |
| Flack Parameters                                               | N                                                                                                                                                                               |
| Completeness                                                   | 0.997                                                                                                                                                                           |

**Table 2** Fractional atomic coordinates ( $\times 10^4$ ) and equivalent isotropic displacement parameters ( $\text{\AA}^2 \times 10^3$ ) for compound **3h**

| Atoms | <i>x</i>   | <i>y</i>    | <i>z</i>    | <i>U</i> <sub>eq.</sub> |
|-------|------------|-------------|-------------|-------------------------|
| N(1)  | 2815.1(17) | 5848.5(13)  | 1978.9(14)  | 20.7(13)                |
| C(9)  | 2311(2)    | 4765.3(16)  | 1382.6(18)  | 21.0(4)                 |
| C(1)  | 3549(2)    | 7108.9(16)  | 1143.4(18)  | 20.8(4)                 |
| C(7)  | 3354(2)    | 6341.3(16)  | -1114.8(18) | 21.6(4)                 |
| C(2)  | 3808(2)    | 7423.6(16)  | -461.8(18)  | 20.5(4)                 |
| C(13) | -136(2)    | -179.9(16)  | 2176.8(17)  | 22.7(4)                 |
| N(4)  | 3909.9(18) | 7842.1(14)  | 2076.3(15)  | 25.8(4)                 |
| C(10) | 1506(2)    | 3466.1(16)  | 2512.7(18)  | 23.9(4)                 |
| C(3)  | 4495(2)    | 8724.3(16)  | -1378.3(18) | 22.8(4)                 |
| C(5)  | 4313(2)    | 7870.1(17)  | -3588.5(18) | 24.5(4)                 |
| N(2)  | 2719.7(19) | 5803.5(14)  | 3461.8(15)  | 25.3(4)                 |
| C(11) | 1099(2)    | 2289.9(16)  | 1755.3(18)  | 23.5(4)                 |
| C(6)  | 3630(2)    | 6595.4(16)  | -2705.5(18) | 23.1(4)                 |
| N(3)  | 3377.2(19) | 7002.2(14)  | 3483.1(15)  | 28.5(4)                 |
| C(14) | -926(2)    | -1502.5(16) | 3337.9(18)  | 25.6(4)                 |
| C(8)  | 2601(2)    | 5024.8(15)  | -146.1(17)  | 21.2(4)                 |
| C(15) | -1518(2)   | -2623.6(17) | 2650(2)     | 31.3(4)                 |
| C(12) | 345(2)     | 967.5(16)   | 2911.9(18)  | 23.7(4)                 |
| C(4)  | 4735(2)    | 8940.6(17)  | -2919.3(18) | 23.8(4)                 |

\**U*<sub>eq.</sub> defined as one third of the trace of the orthogonalized UIJ tensor.

**Table 3** Bond lengths ( $\text{\AA}$ ) and bond angles ( $^\circ$ ) for compound **3h**

|                 |            |                   |            |
|-----------------|------------|-------------------|------------|
| N(1)-C(9)       | 1.398(2)   | C(13)-C(14)       | 1.529(2)   |
| N(1)-C(1)       | 1.363(19)  | C(13)-C(12)       | 1.520(2)   |
| N(1)-N(2)       | 1.366(18)  | N(3)-N(4)         | 1.366(19)  |
| C(9)-C(10)      | 1.502(2)   | C(10)-C(11)       | 1.526(2)   |
| C(9)-C(8)       | 1.351(2)   | C(3)-C(4)         | 1.373(2)   |
| C(1)-C(2)       | 1.432(2)   | C(5)-C(6)         | 1.378(2)   |
| C(1)-N(4)       | 1.328(2)   | C(5)-C(4)         | 1.397(2)   |
| C(7)-C(2)       | 1.410(2)   | N(2)-N(3)         | 1.297(19)  |
| C(7)-C(6)       | 1.411(2)   | C(11)-C(12)       | 1.522(2)   |
| C(7)-C(8)       | 1.449(2)   | C(14)-C(15)       | 1.521(2)   |
| C(2)-C(3)       | 1.409(2)   |                   |            |
| C(1)-N(1)-C(9)  | 125.07(14) | C(3)-C(2)-C(7)    | 120.37(15) |
| C(1)-N(1)-N(2)  | 108.84(13) | C(12)-C(13)-C(14) | 112.89(13) |
| N(2)-N(1)-C(9)  | 126.05(13) | C(1)-N(4)-N(3)    | 105.57(12) |
| N(1)-C(9)-C(10) | 116.43(14) | C(9)-C(10)-C(11)  | 113.56(13) |
| C(8)-C(9)-N(1)  | 115.55(13) | C(4)-C(3)-C(2)    | 120.01(15) |
| C(8)-C(9)-C(10) | 128.02(15) | C(6)-C(5)-C(4)    | 120.46(15) |

|                |            |                   |            |
|----------------|------------|-------------------|------------|
| N(1)-C(1)-C(2) | 120.16(14) | N(3)-N(2)-N(1)    | 105.15(12) |
| N(4)-C(1)-N(1) | 107.99(14) | C(12)-C(11)-C(10) | 112.47(14) |
| N(4)-C(1)-C(2) | 131.86(14) | C(5)-C(6)-C(7)    | 120.80(15) |
| C(2)-C(7)-C(6) | 118.11(14) | N(2)-N(3)-N(4)    | 122.46(13) |
| C(2)-C(7)-C(8) | 119.80(14) | C(15)-C(14)-C(13) | 113.55(14) |
| C(6)-C(7)-C(8) | 122.09(14) | C(9)-C(8)-C(7)    | 123.04(15) |
| C(7)-C(2)-C(1) | 116.31(14) | C(13)-C(12)-C(11) | 112.48(13) |
| C(3)-C(2)-C(1) | 123.31(15) | C(3)-C(4)-C(5)    | 120.24(14) |

**Table 4** Anisotropic displacement parameters ( $\text{\AA}^2 \times 10^3$ ) for compound **3h**

| Atoms | $U_{11}$ | $U_{22}$ | $U_{33}$ | $U_{23}$ | $U_{13}$ | $U_{12}$ |
|-------|----------|----------|----------|----------|----------|----------|
| N(1)  | 24.3(7)  | 18.9(7)  | 19.8(7)  | -0.9(5)  | -10.1(6) | -4.1(5)  |
| C(9)  | 22.3(8)  | 15.9(8)  | 25.6(8)  | -2.0(6)  | -10.8(7) | -3.0(6)  |
| C(1)  | 21.0(8)  | 17.9(8)  | 25.3(8)  | -3.8(6)  | -10.7(7) | -3.3(6)  |
| C(7)  | 20.7(8)  | 20.4(8)  | 25.2(8)  | -3.2(6)  | -10.9(7) | -2.3(6)  |
| C(2)  | 20.4(8)  | 19.5(8)  | 22.6(8)  | -3.1(6)  | -9.6(7)  | -2.6(6)  |
| C(13) | 25.2(8)  | 21.9(9)  | 21.9(8)  | -2.3(6)  | -10.5(7) | -4.1(6)  |
| N(4)  | 32.3(8)  | 24.2(7)  | 24.9(7)  | -4.7(6)  | -14.7(6) | -5.5(6)  |
| C(10) | 27.8(9)  | 21.3(9)  | 23.1(8)  | -0.4(6)  | -11.3(7) | -5.1(7)  |
| C(3)  | 23.3(8)  | 20.1(8)  | 27.6(9)  | -4.4(6)  | -12.1(7) | -5.2(6)  |
| C(5)  | 26.1(8)  | 27.4(9)  | 21.3(8)  | -0.9(6)  | -11.5(7) | -2.6(7)  |
| N(2)  | 31.3(8)  | 25.6(8)  | 23.4(8)  | -2.6(5)  | -15.2(6) | -4.7(6)  |
| C(11) | 25.6(8)  | 21.6(9)  | 24.1(8)  | 0.0(6)   | -11.3(7) | -5.4(6)  |
| C(6)  | 25.4(8)  | 23.6(9)  | 22.7(8)  | -4.2(6)  | -11.4(7) | -4.3(7)  |
| N(3)  | 35.3(8)  | 26.9(8)  | 27.9(8)  | -3.5(6)  | -16.8(6) | -6.7(6)  |
| C(14) | 27.3(9)  | 25.0(9)  | 24.6(8)  | -2.9(7)  | -10.2(7) | -7.8(7)  |
| C(8)  | 24.5(8)  | 17.3(8)  | 23.6(8)  | -3.1(6)  | -11.2(7) | -4.4(6)  |
| C(15) | 33.7(10) | 24.7(9)  | 38.1(10) | -6.7(7)  | -15.5(8) | -8.9(7)  |
| C(12) | 26.9(8)  | 21.2(8)  | 24.6(8)  | -0.8(6)  | -12.1(7) | -5.8(6)  |
| C(4)  | 24.4(8)  | 18.8(8)  | 26.1(8)  | 2.0(6)   | -9.4(7)  | -5.2(6)  |

\*The Anisotropic displacement factor exponent takes the form:  $-2 \pi^2 [h^2 a^{*2} U_{11} + \dots + 2hka \times b \times U_{12}]$

**Table 5** Hydrogen atom coordinates ( $\text{\AA} \times 10^4$ ) and isotropic displacement parameters ( $\text{\AA}^2 \times 10^3$ ) for compound **3h**

| Atoms  | $x$   | $y$  | $z$  | $U_{eq.}$ |
|--------|-------|------|------|-----------|
| H(13A) | 957   | -465 | 1264 | 27        |
| H(13B) | -1016 | 221  | 1778 | 27        |
| H(3C)  | 379   | 3751 | 3393 | 29        |
| H(4A)  | 2347  | 3081 | 2963 | 29        |

|        |       |       |       |    |
|--------|-------|-------|-------|----|
| H(3)   | 4792  | 9452  | -930  | 27 |
| H(5)   | 4498  | 8022  | -4660 | 29 |
| H(11A) | 222   | 2660  | 1339  | 28 |
| H(11B) | 2216  | 2023  | 854   | 28 |
| H(6)   | 3342  | 5879  | -3173 | 28 |
| H(14A) | -17   | -1935 | 3687  | 31 |
| H(14B) | -1973 | -1206 | 4281  | 31 |
| H(8)   | 2299  | 4311  | -607  | 25 |
| H(15A) | -493  | -2917 | 1709  | 47 |
| H(15B) | -2472 | -2223 | 2360  | 47 |
| H(15C) | -1970 | -3454 | 3437  | 47 |
| H(12A) | 1243  | 573   | 3292  | 28 |
| H(12B) | -743  | 1242  | 3836  | 28 |
| H(4)   | 5189  | 9821  | -3533 | 29 |

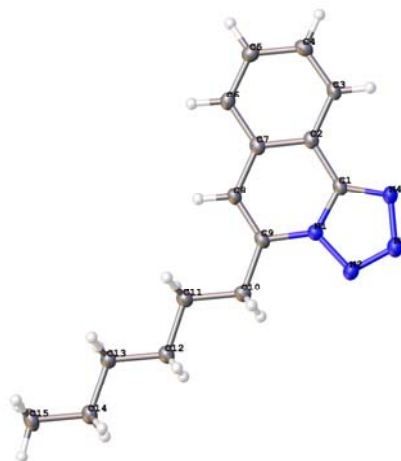

**Figure 1.** ORTEP drawing of C<sub>15</sub>H<sub>18</sub>N<sub>4</sub> with 50% probability ellipsoids, showing the atomic numbering scheme.

## References

- 1 C.-W. Tsai, S.-C. Yang, Y.-M. Liu, M.-J. Wu. *Tetrahedron* 2009, **65**, 8367.
- 2 J. M. Keith. *J. Org. Chem.* 2006, **71**, 9540.
- 3 Oxford (2011) CrysAlis<sup>Pro</sup>, Version 1.171.35.11, Oxford Diffraction Ltd.
- 4 Bruker. (1997) SHELXTL. Structure Determination Programs, Version 5.10, Bruker AXS Inc., 6300 Enterprise Lane, Madison, WI 53719-1173, USA.
- 5 *International Tables for X-ray Crystallography*: (1989) Vol. C (Kluwer Academic Publishers, Dordrecht) Tables 4.2.6.8 and 6.1.1.4.

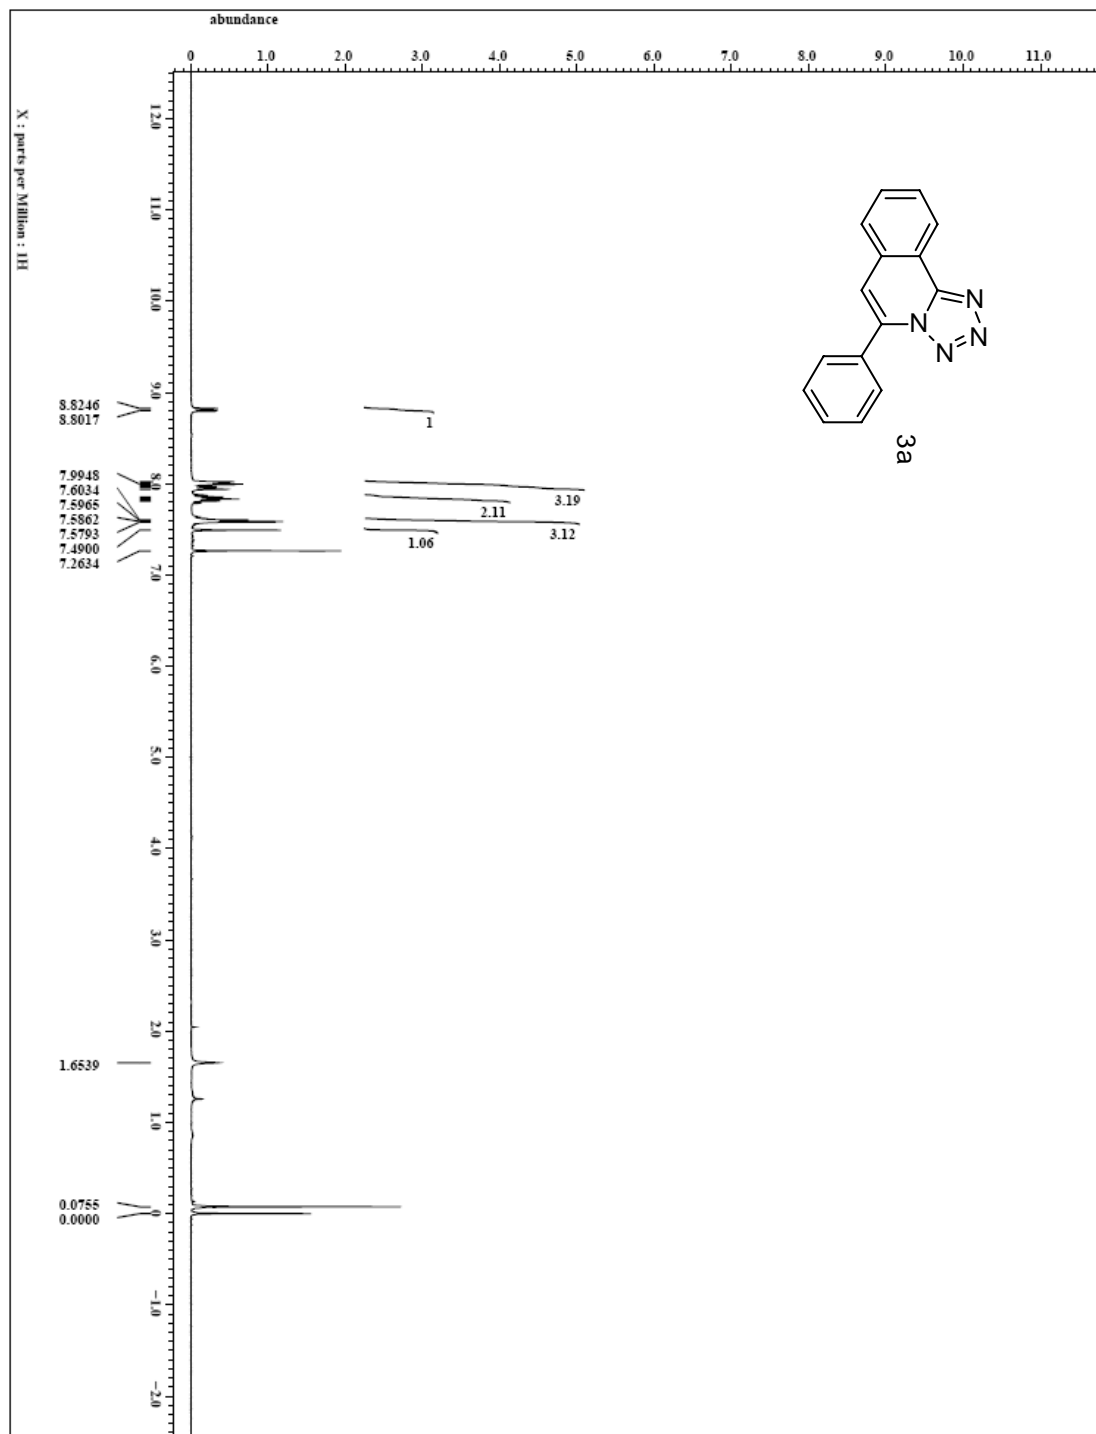

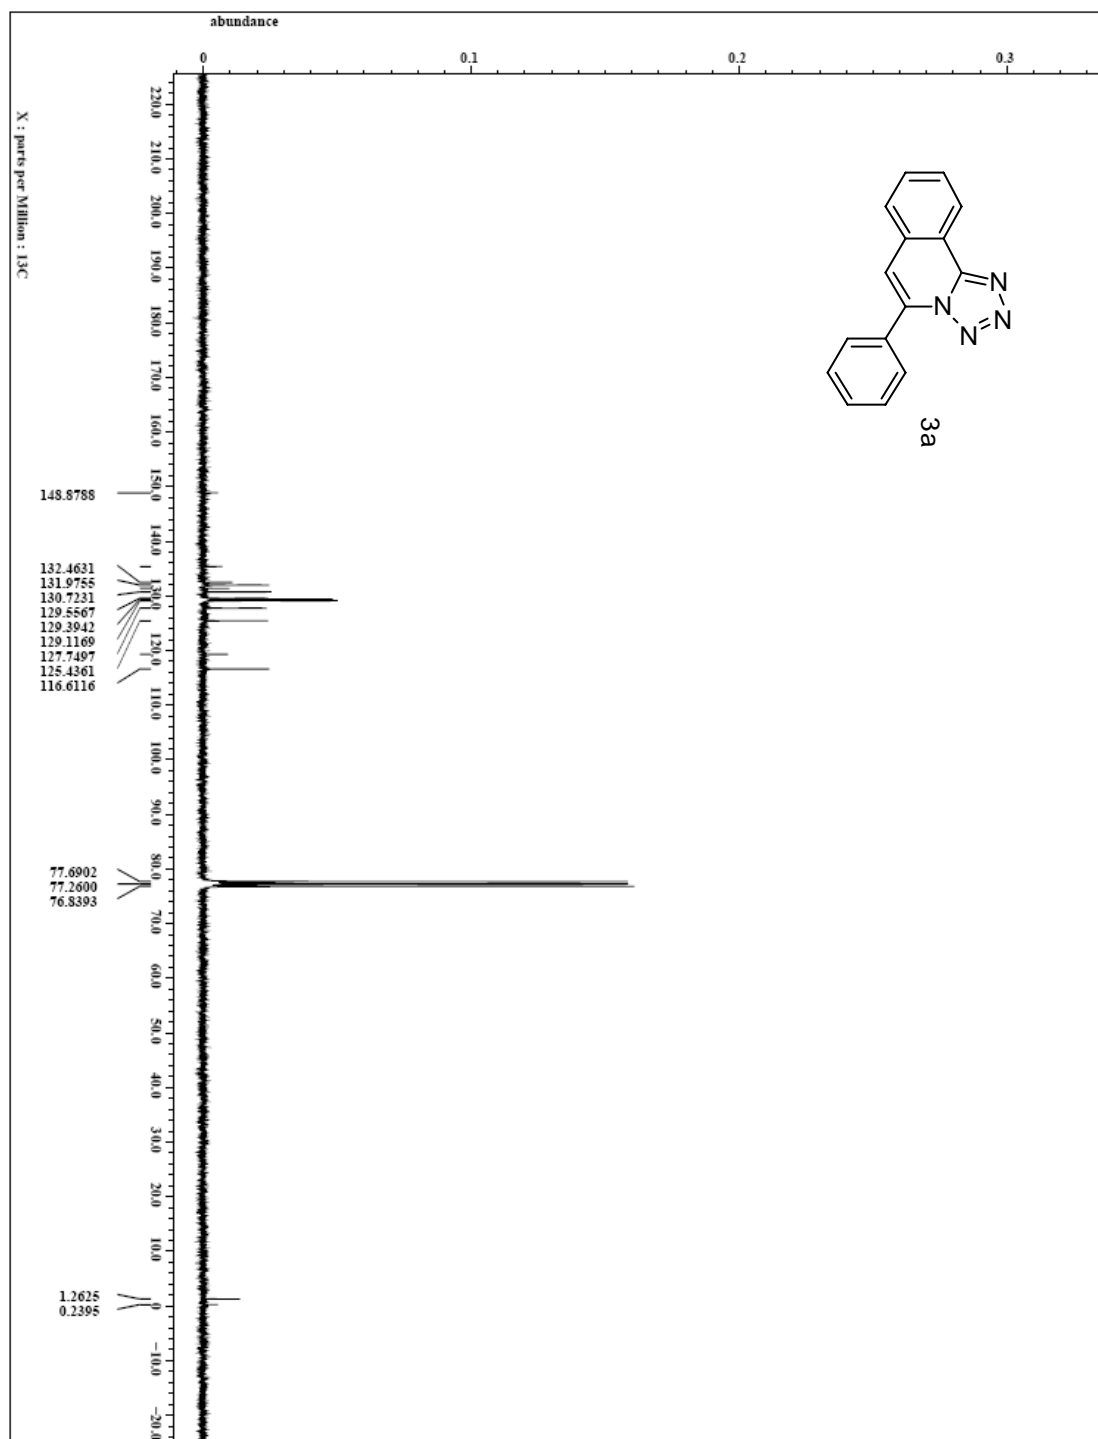

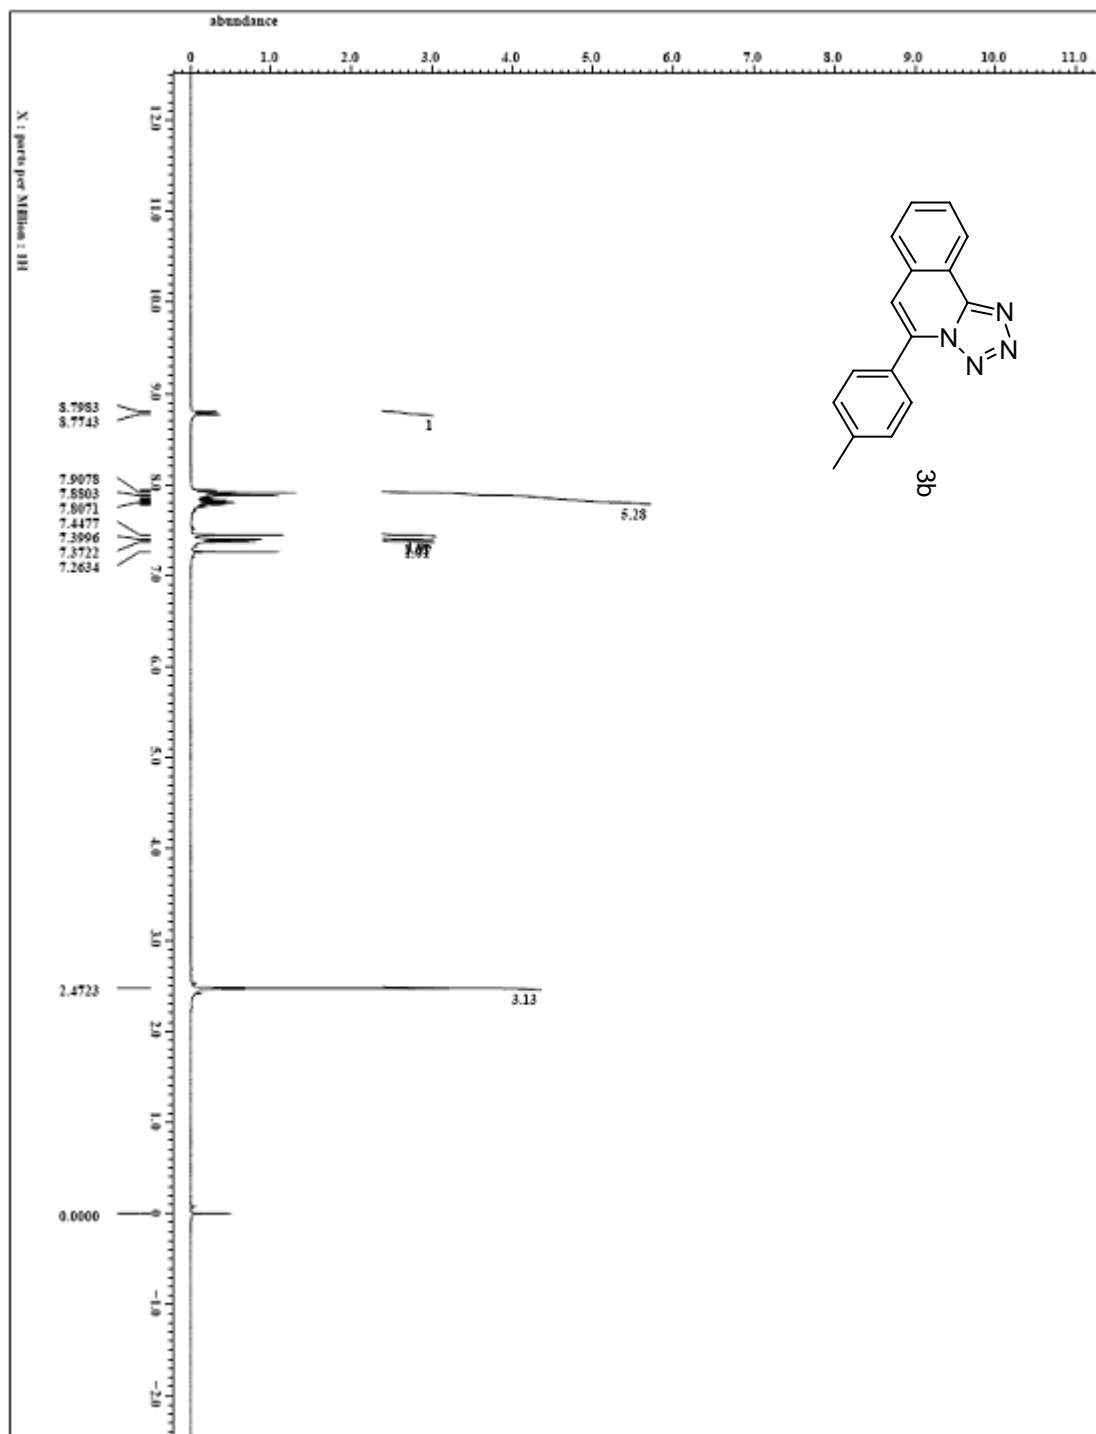



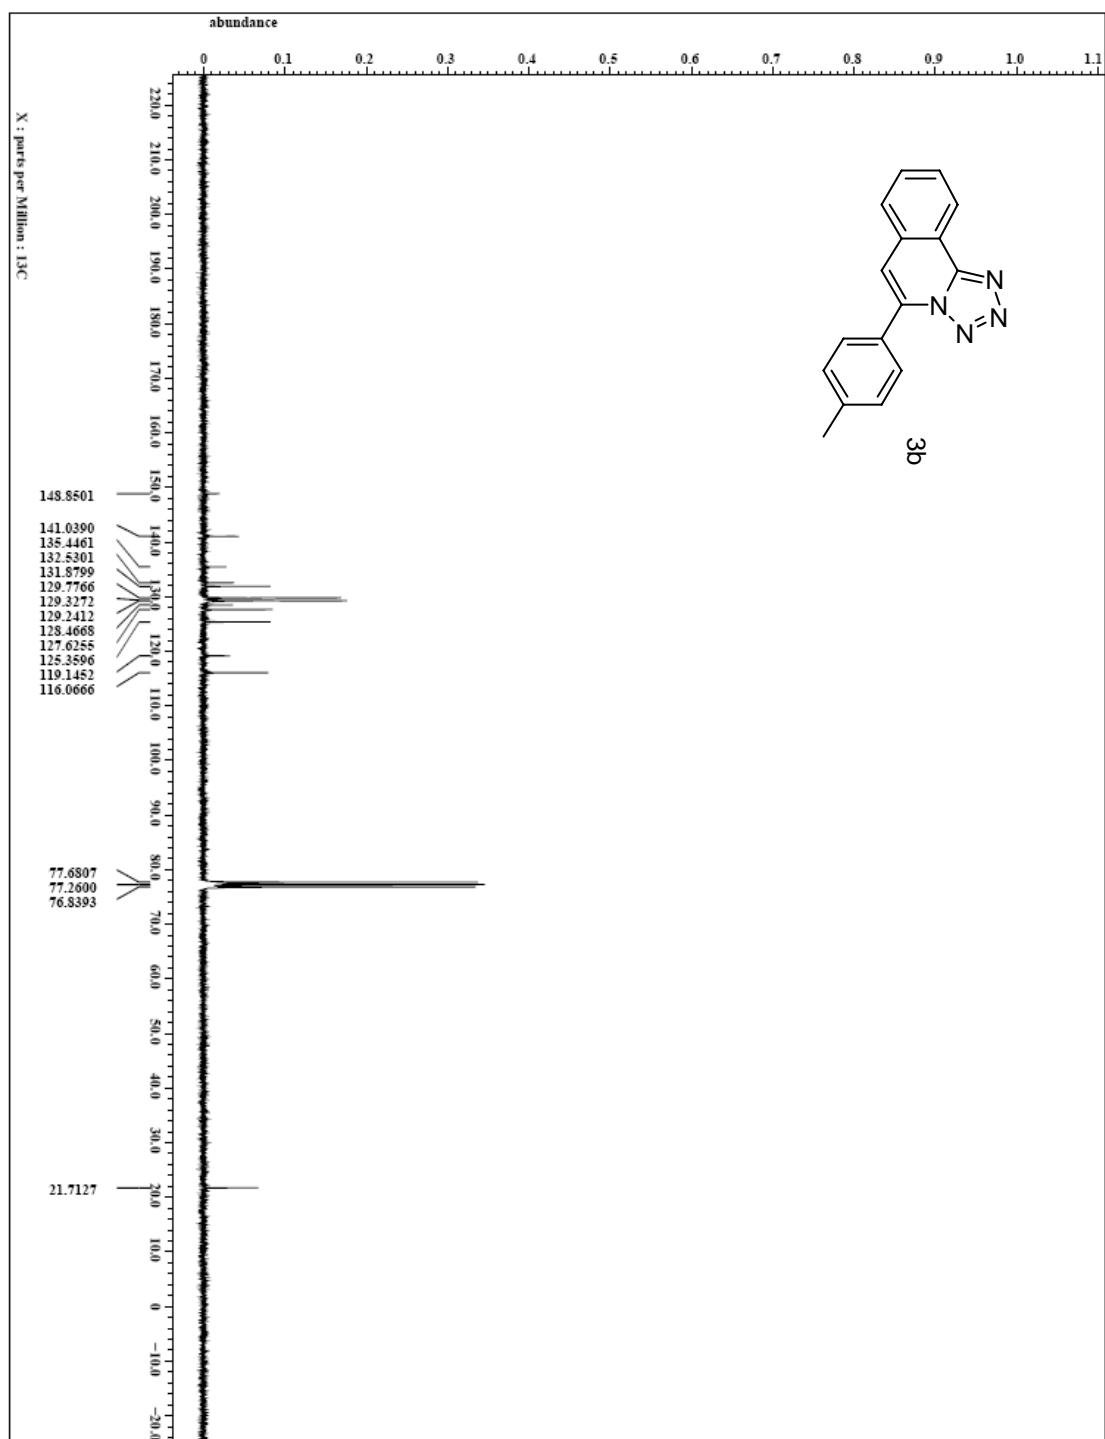

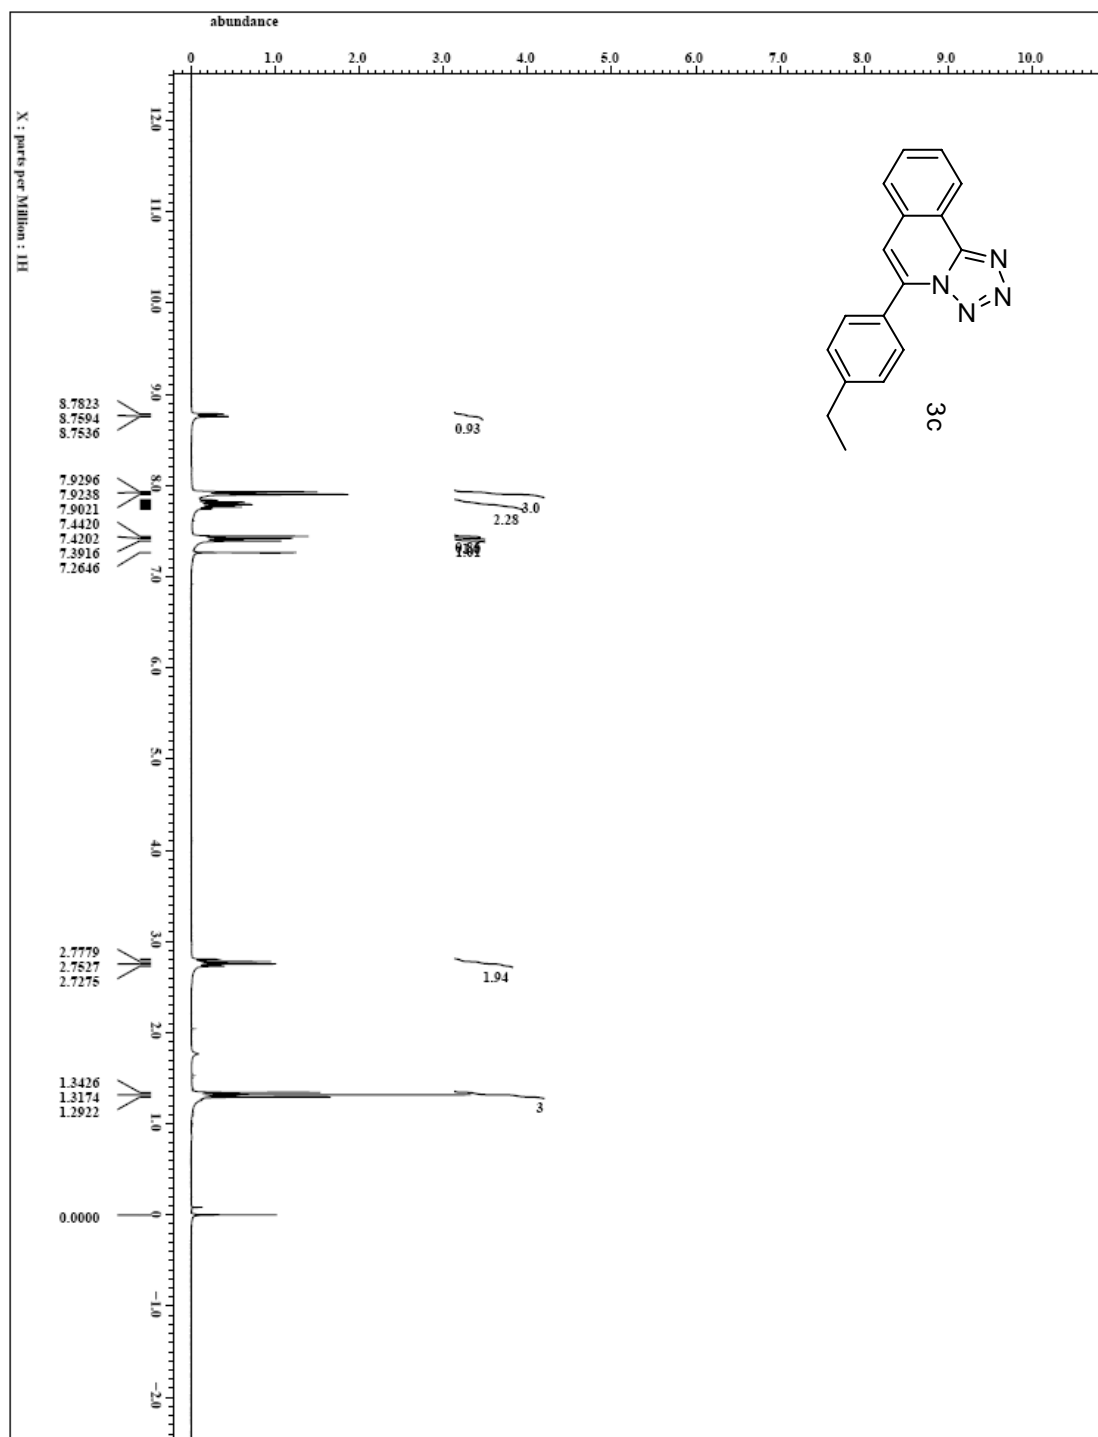

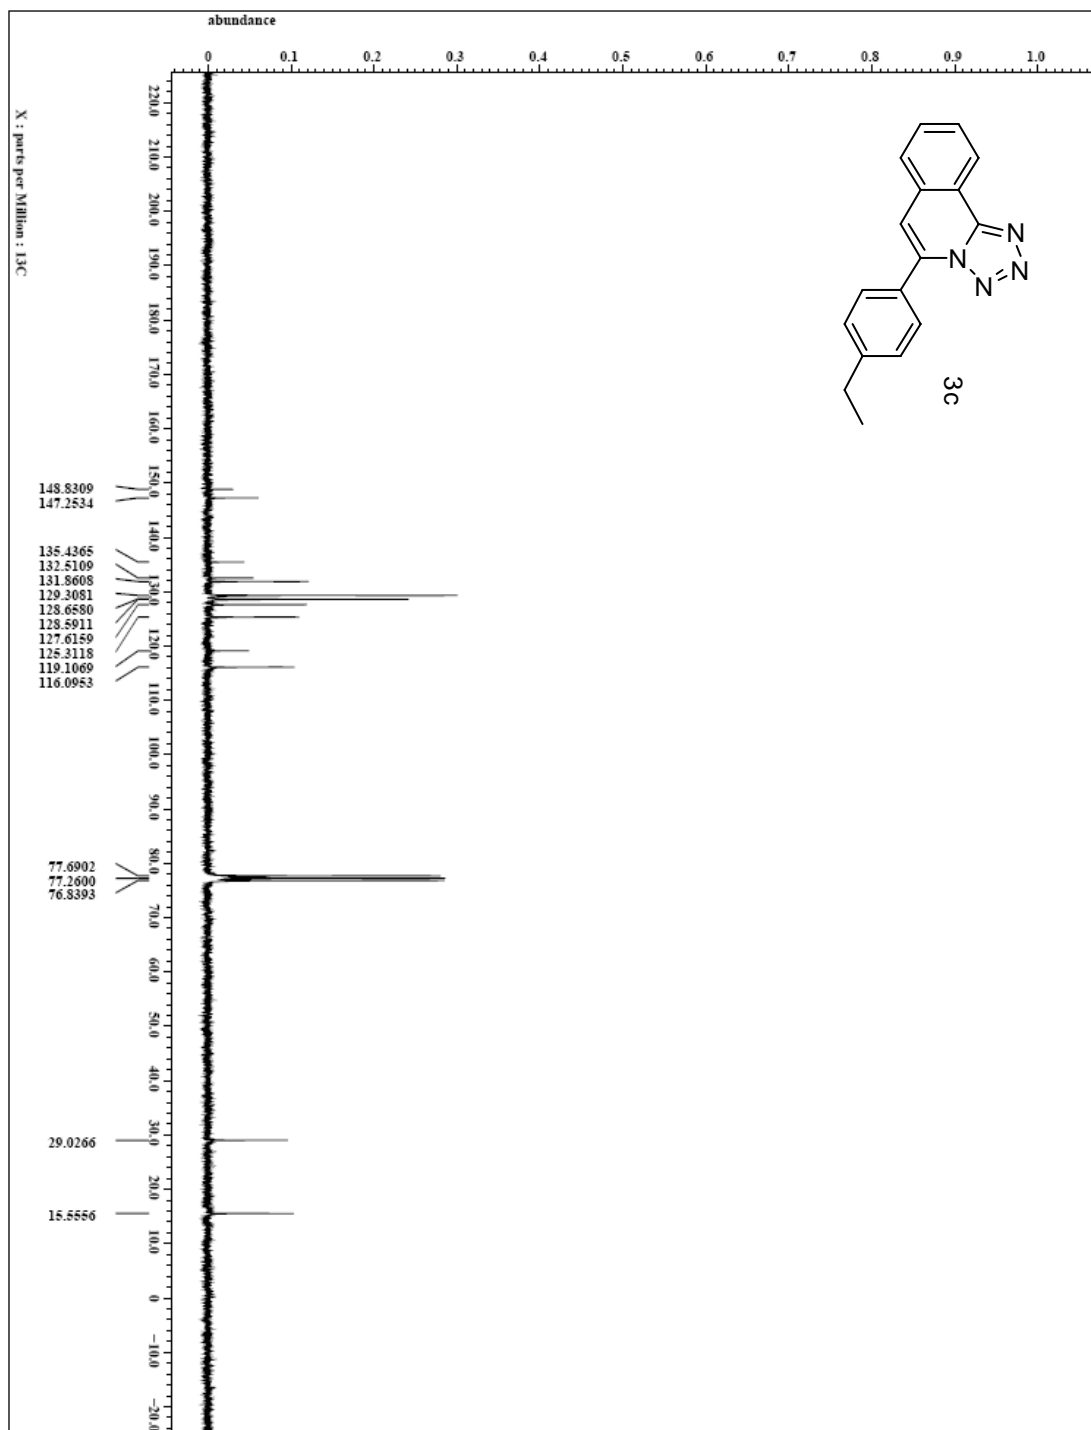

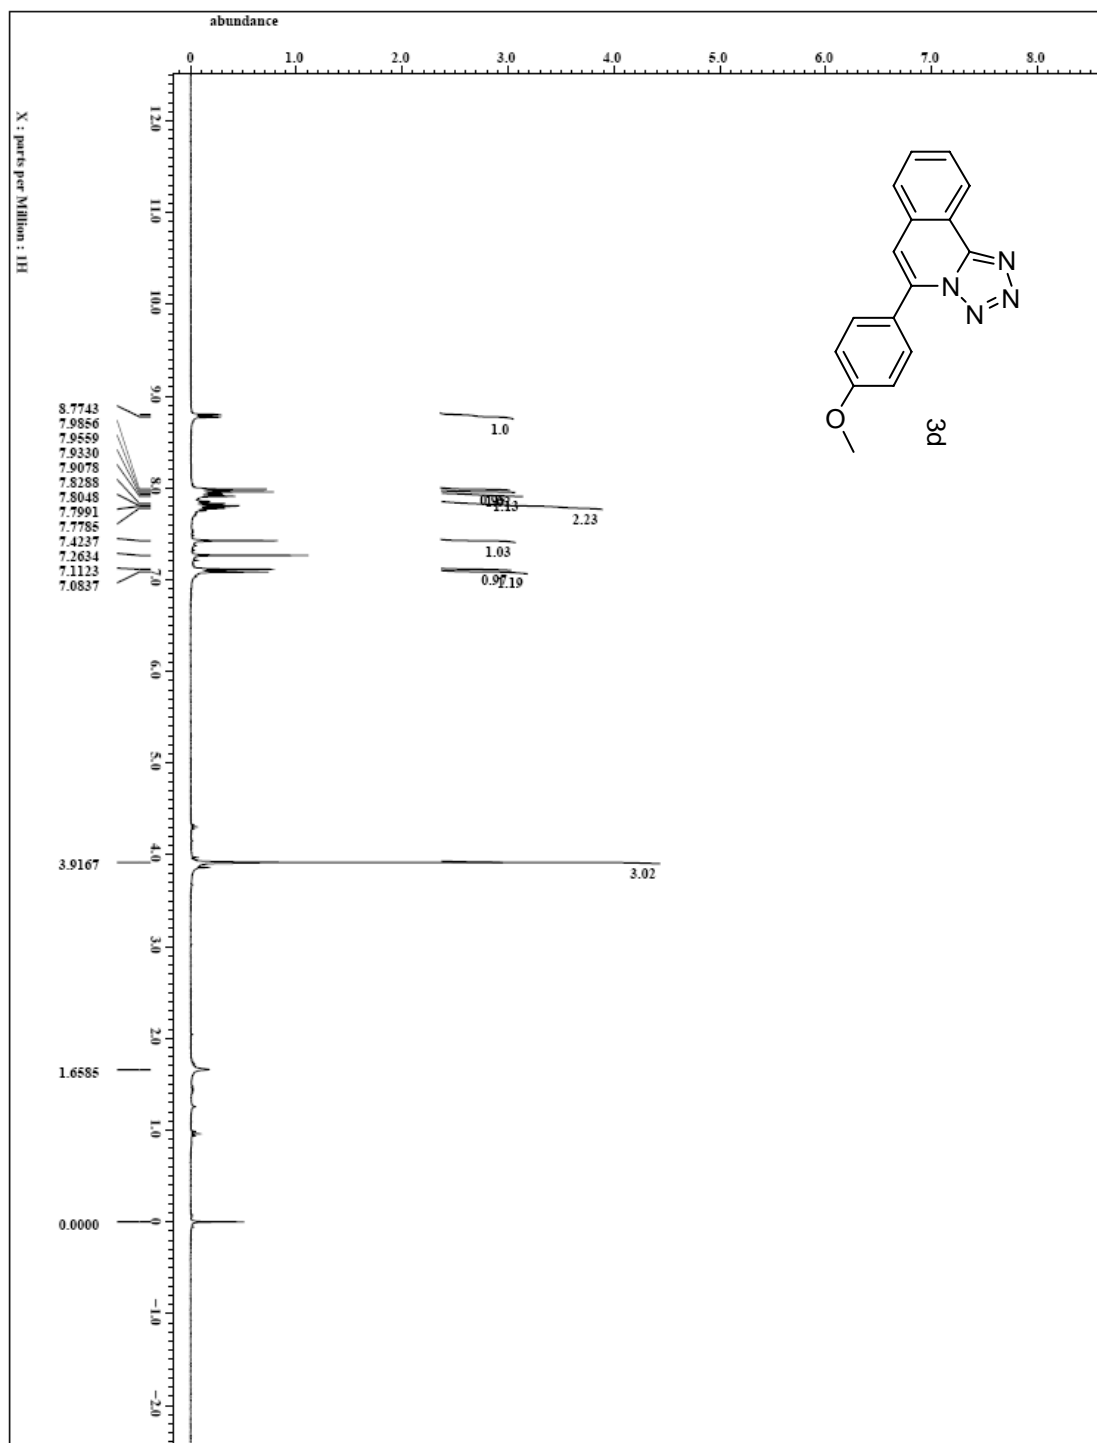

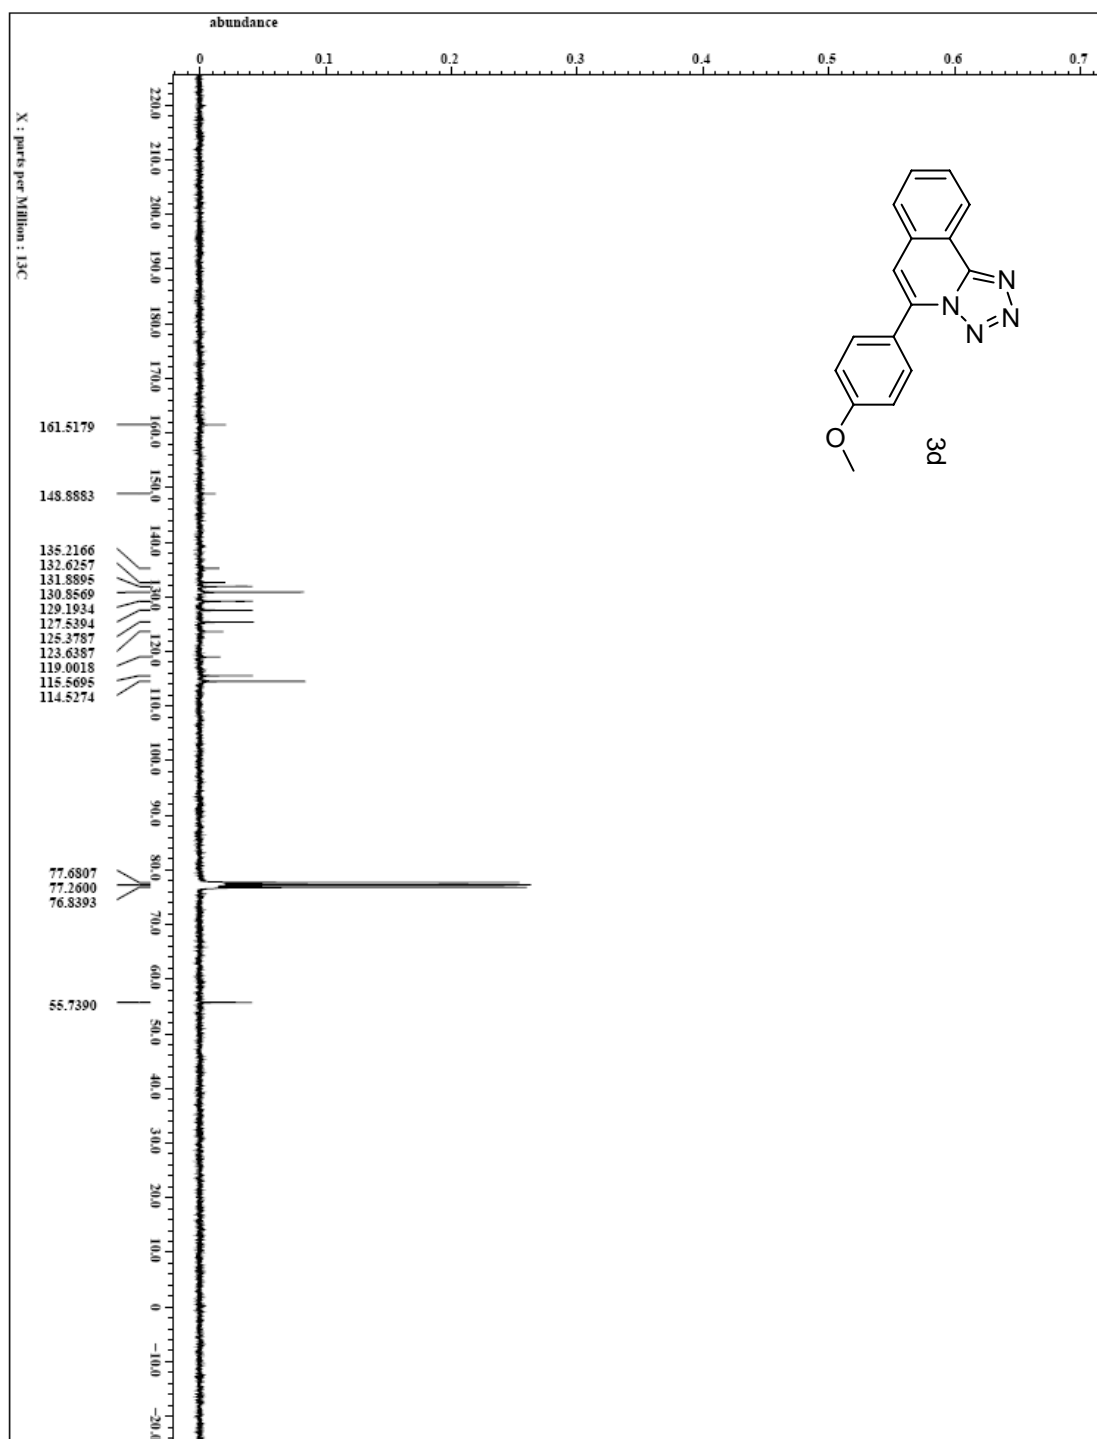

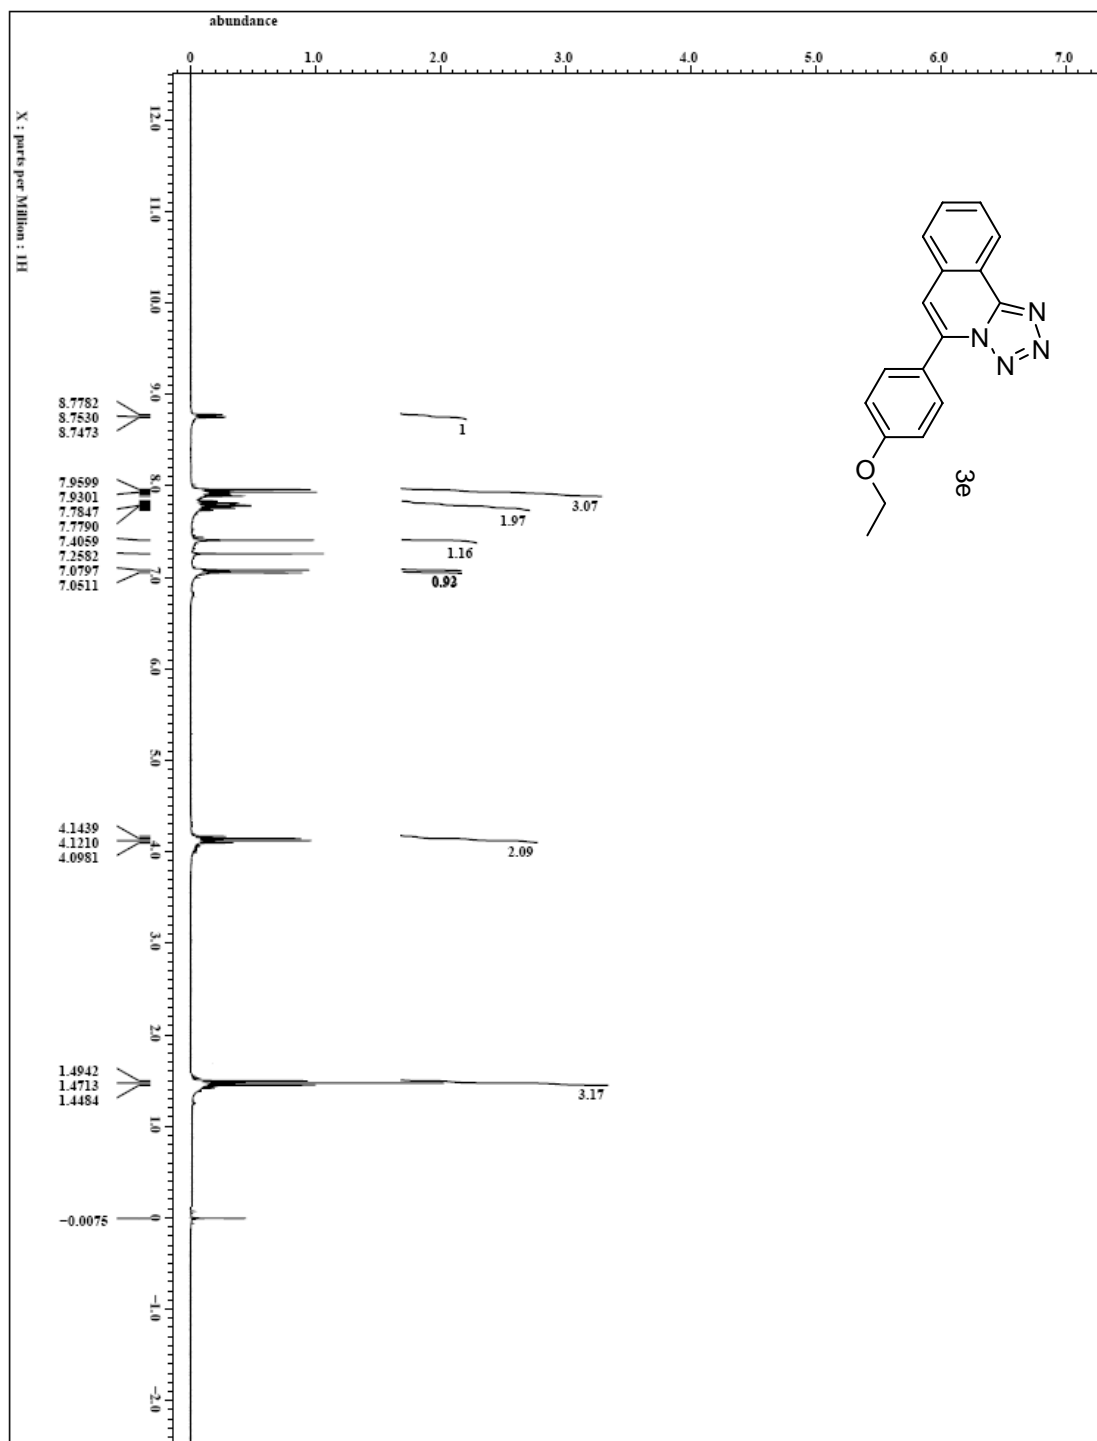

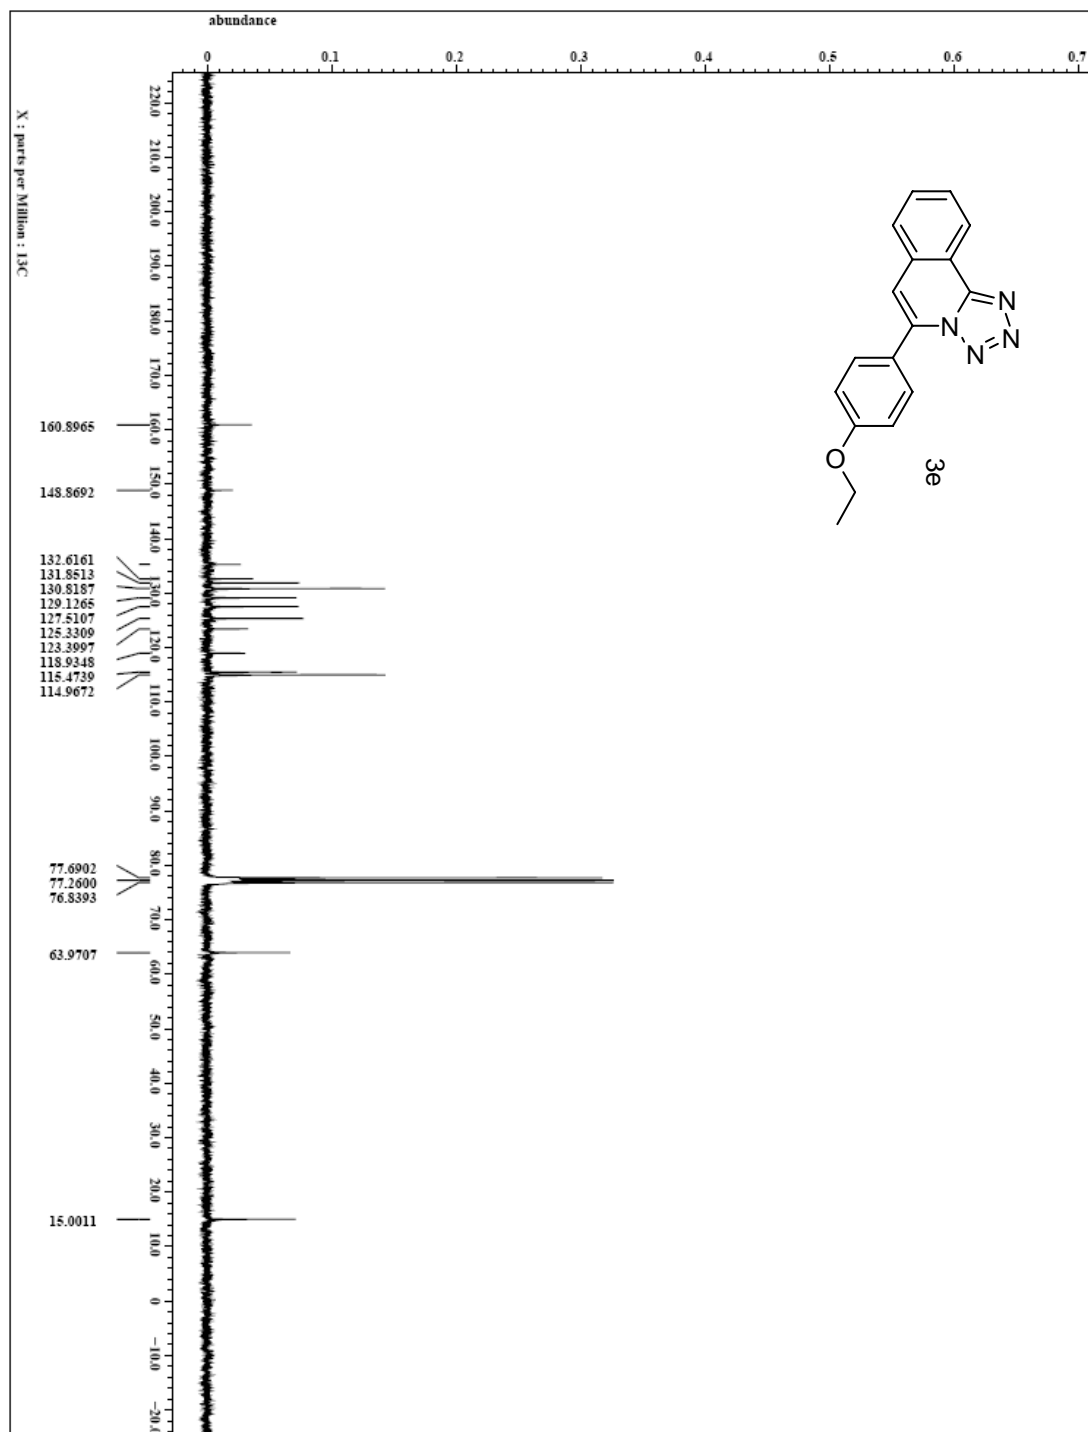

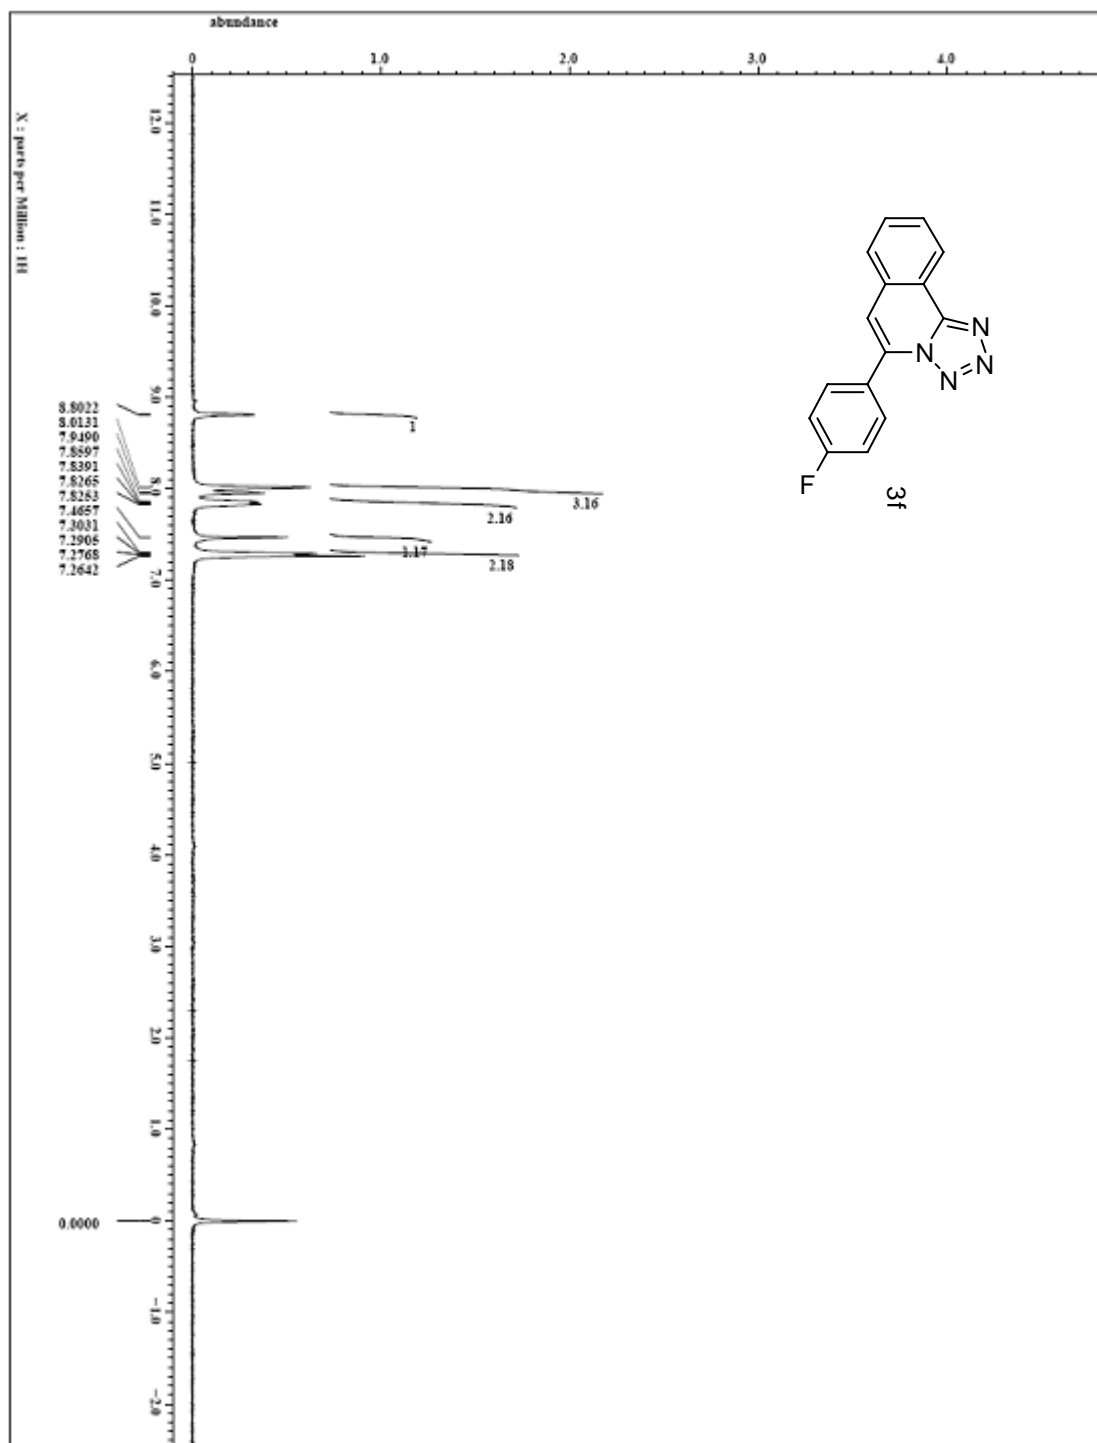



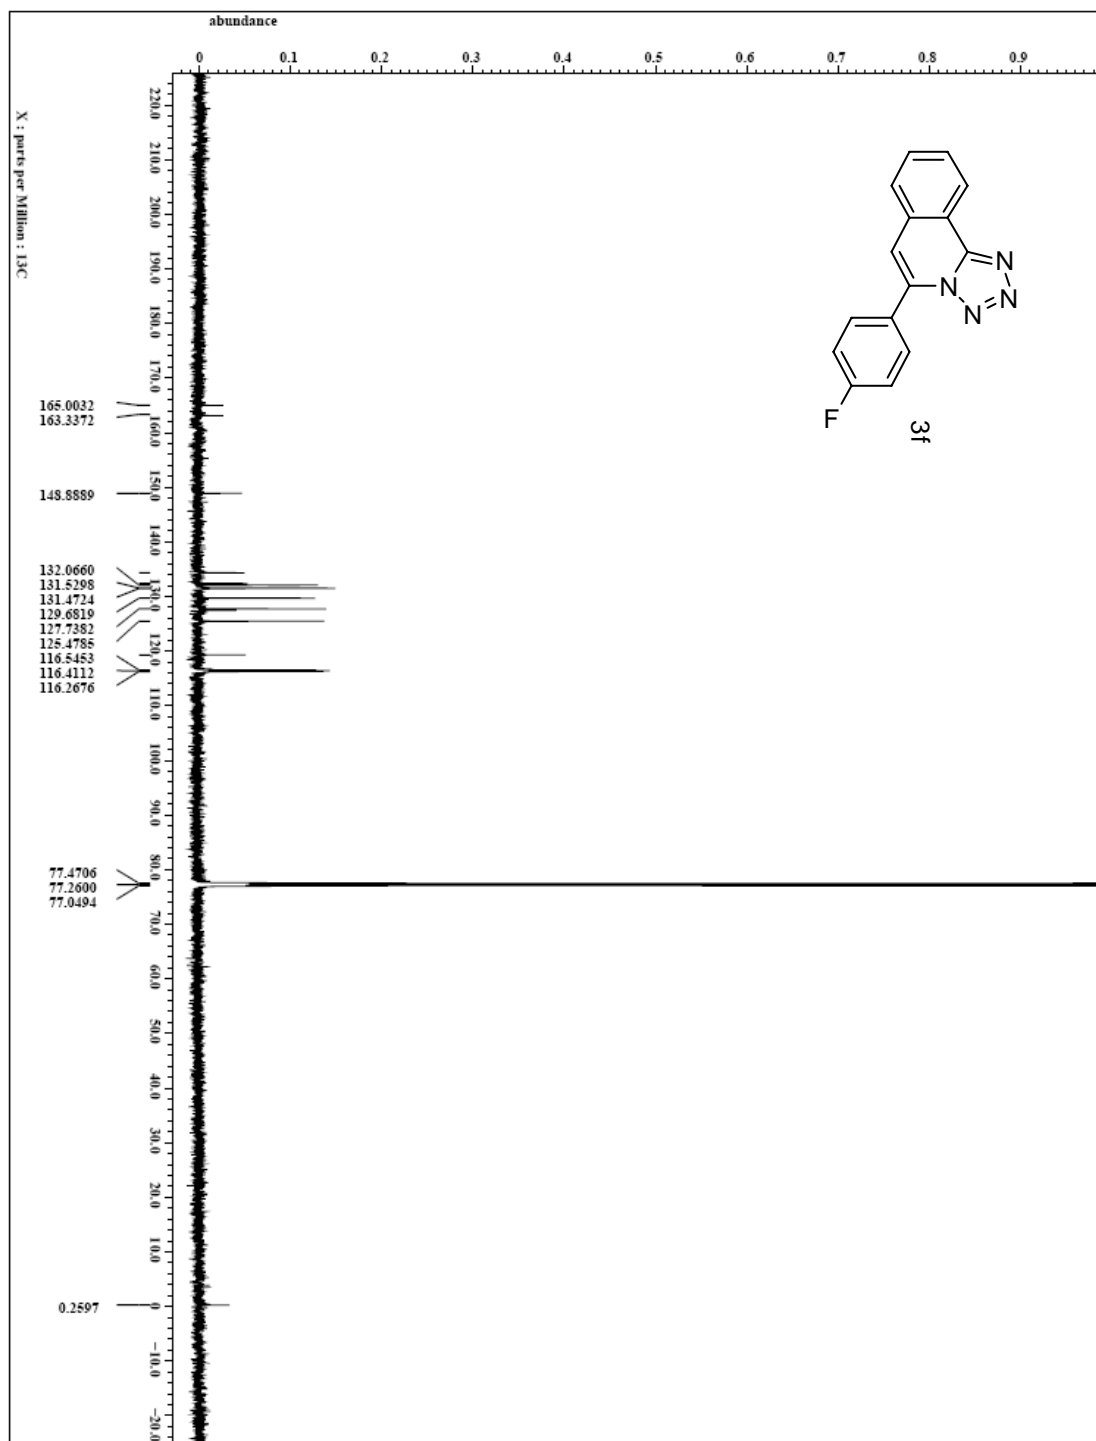

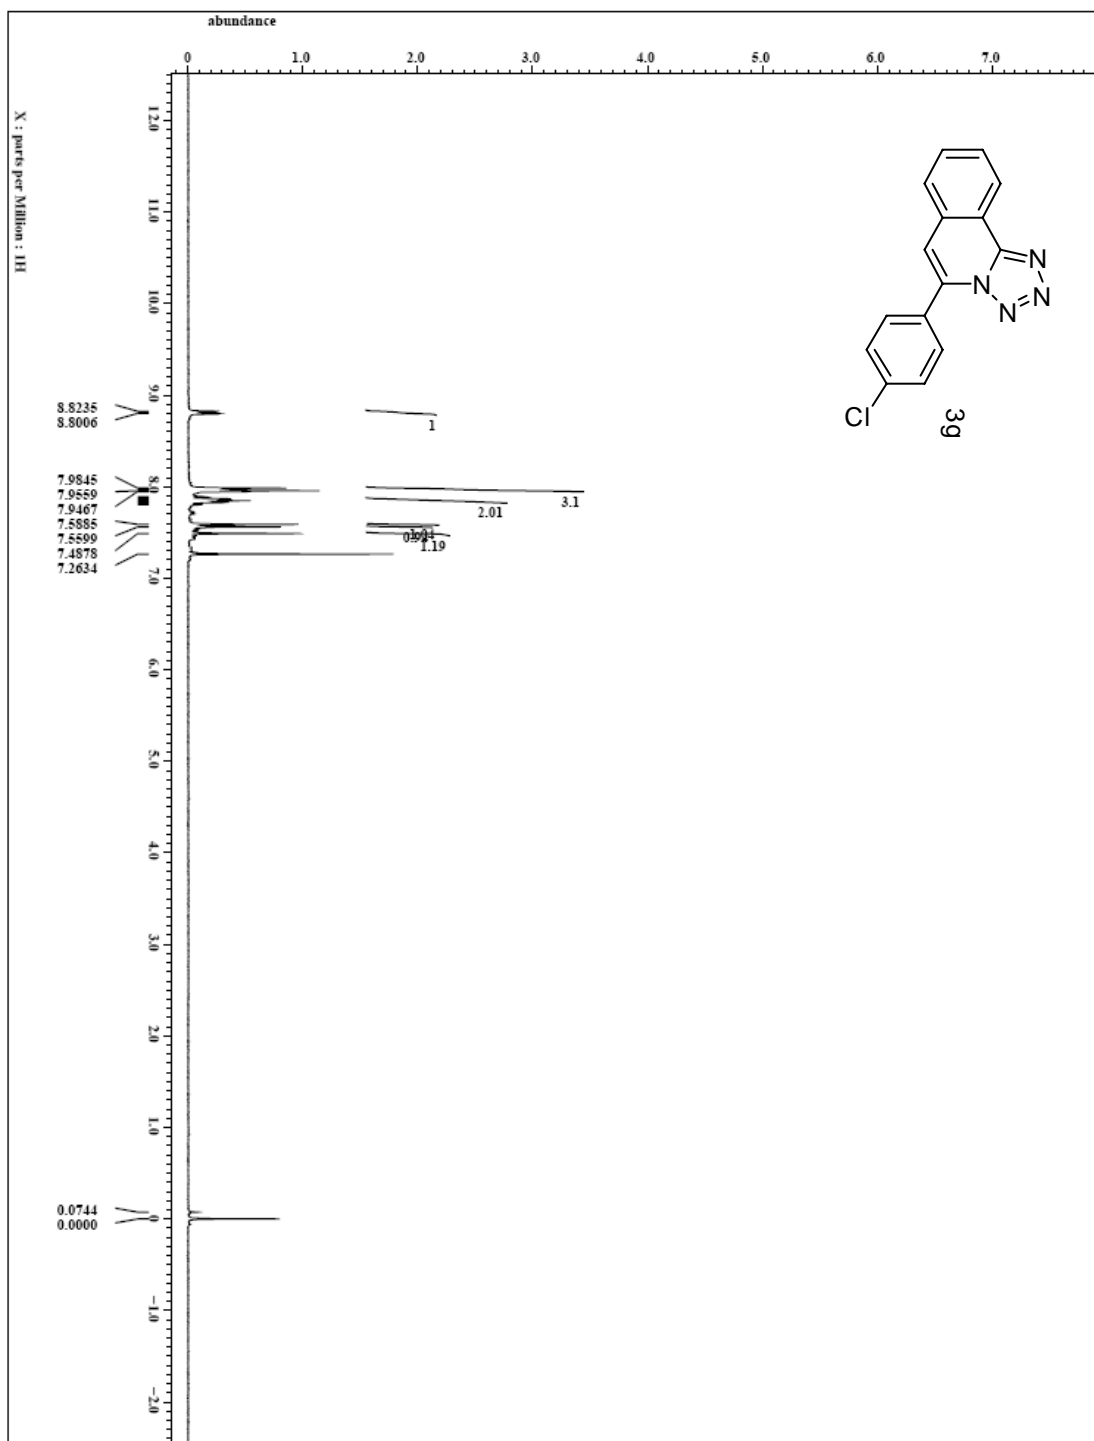

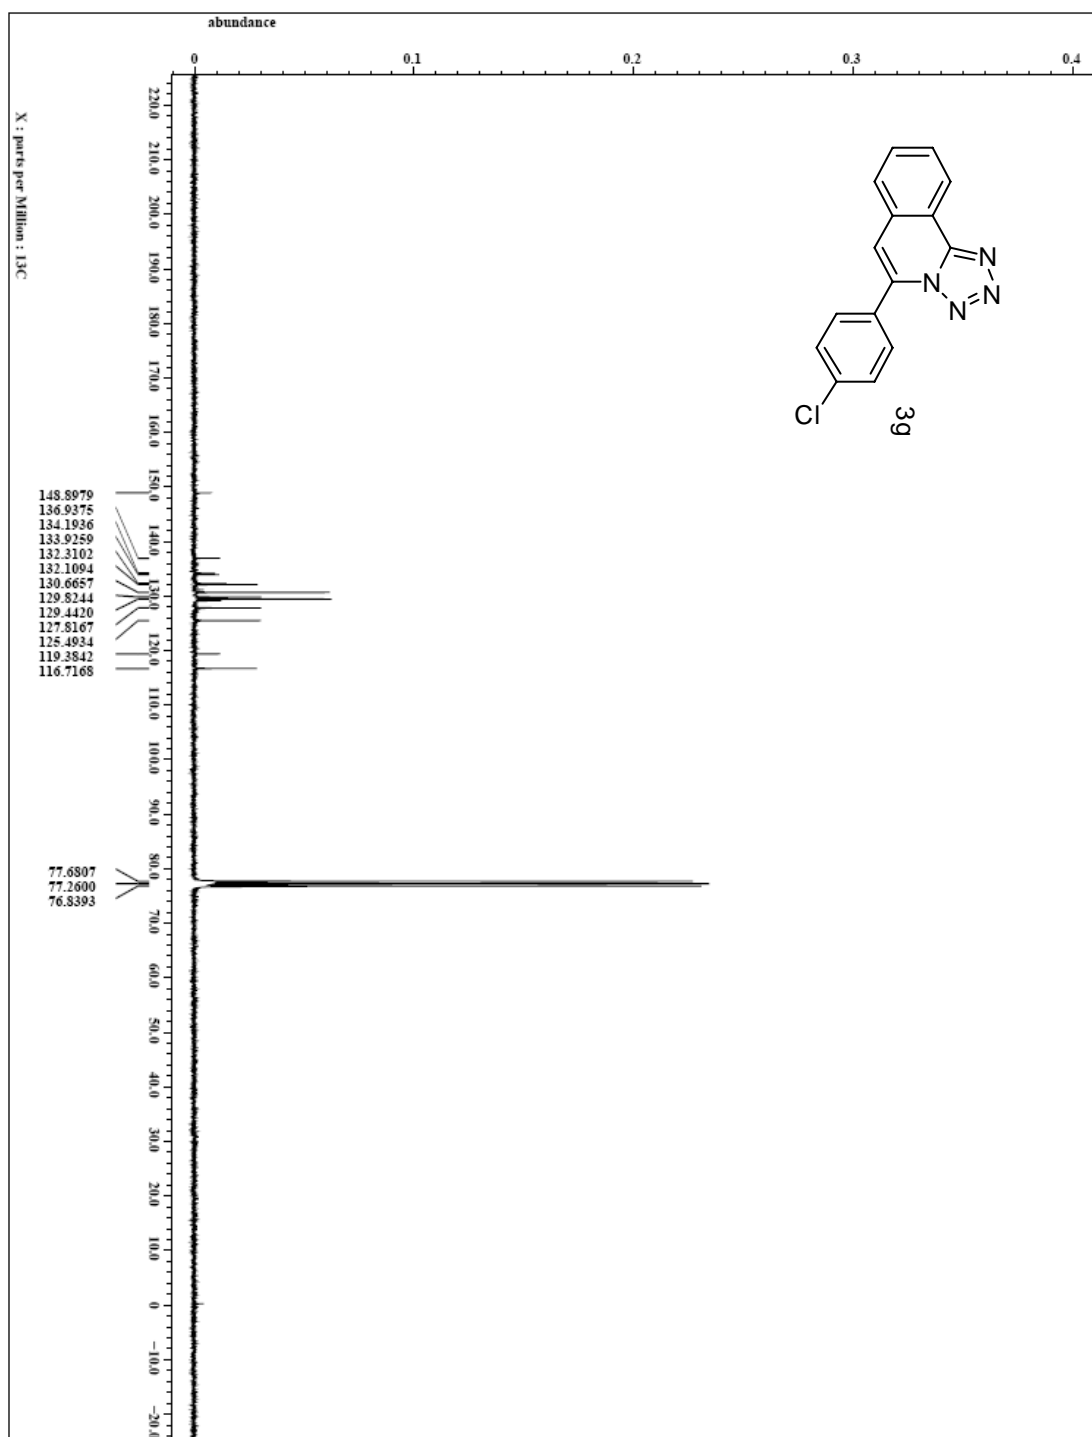

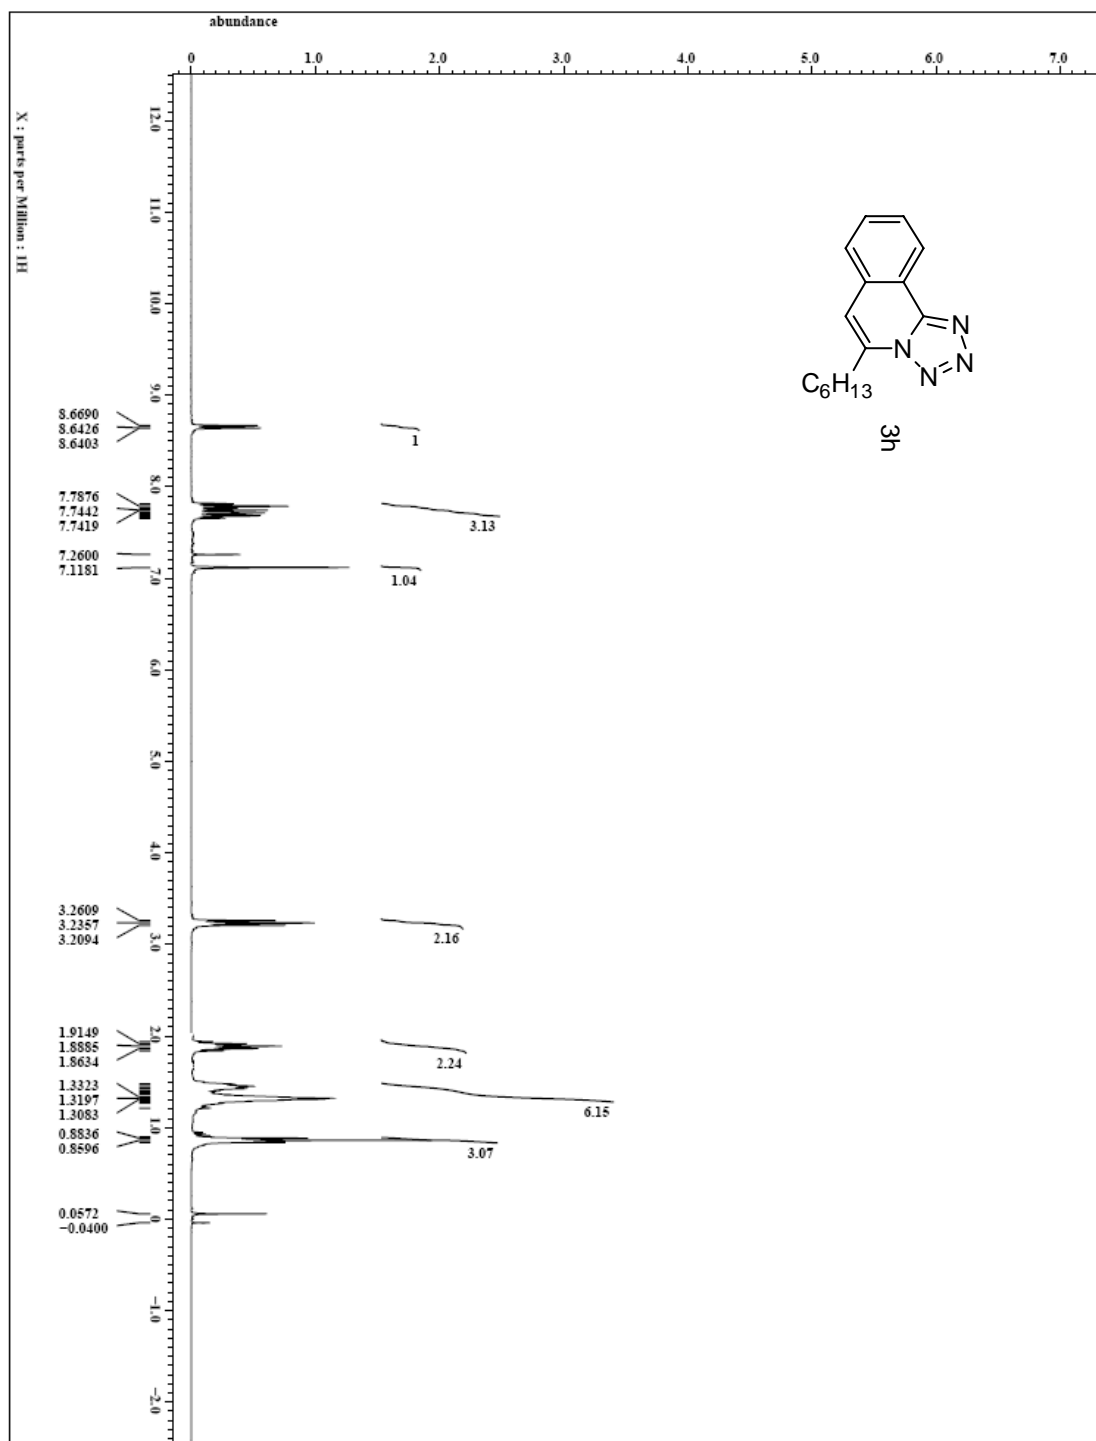

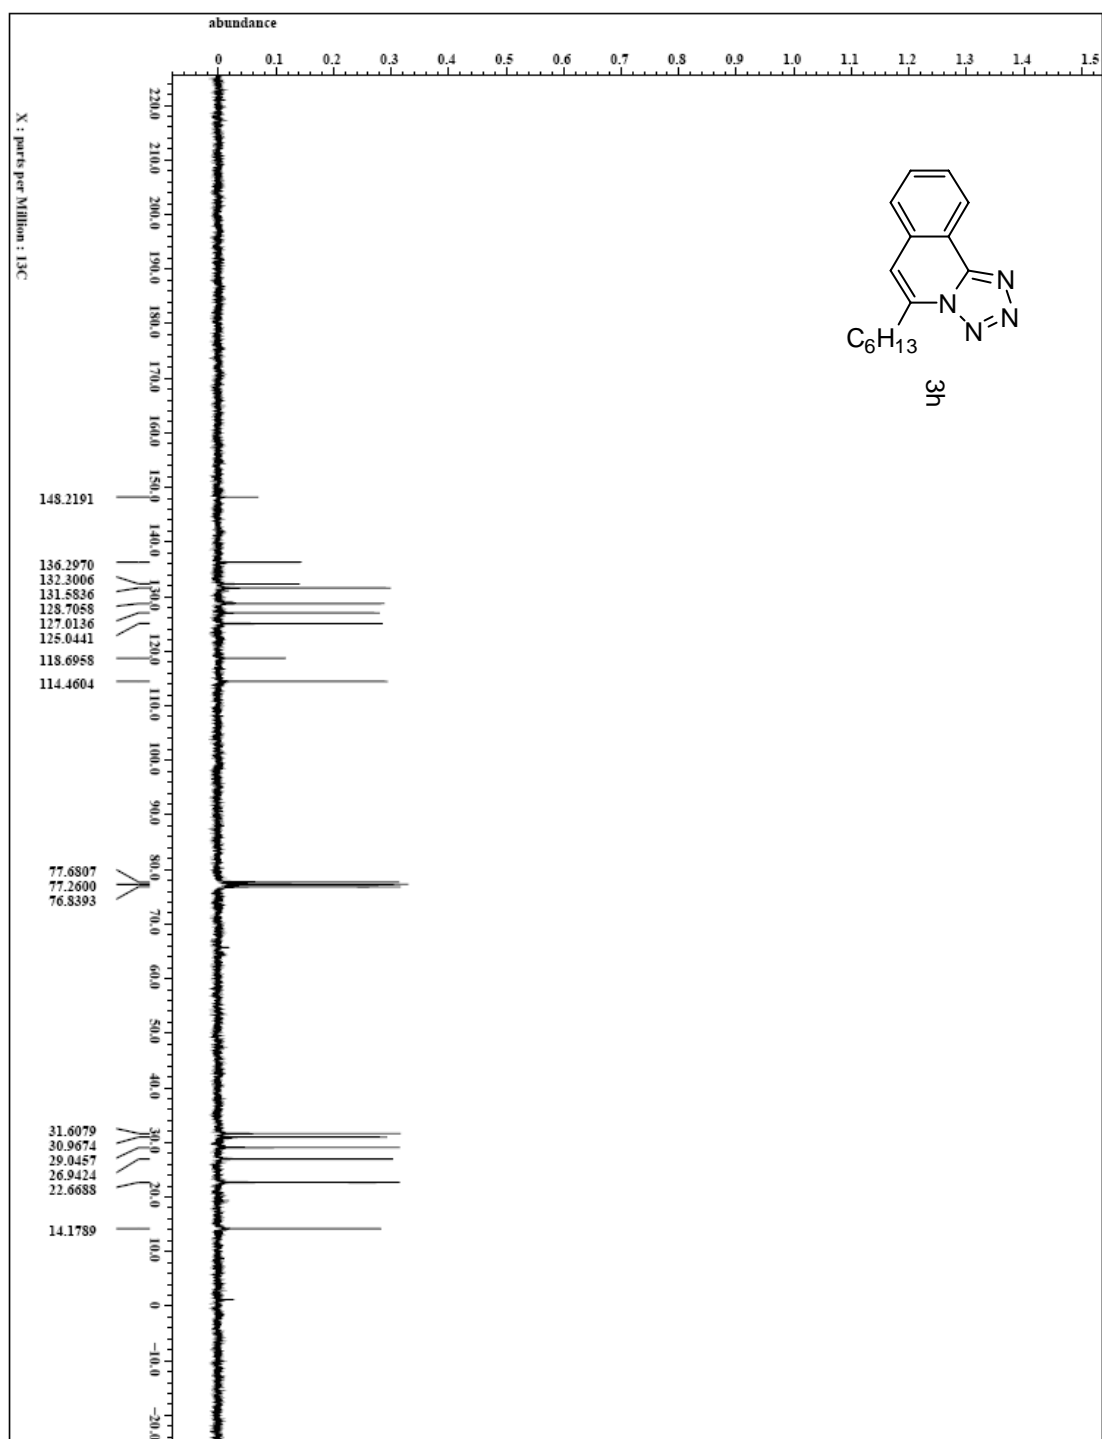

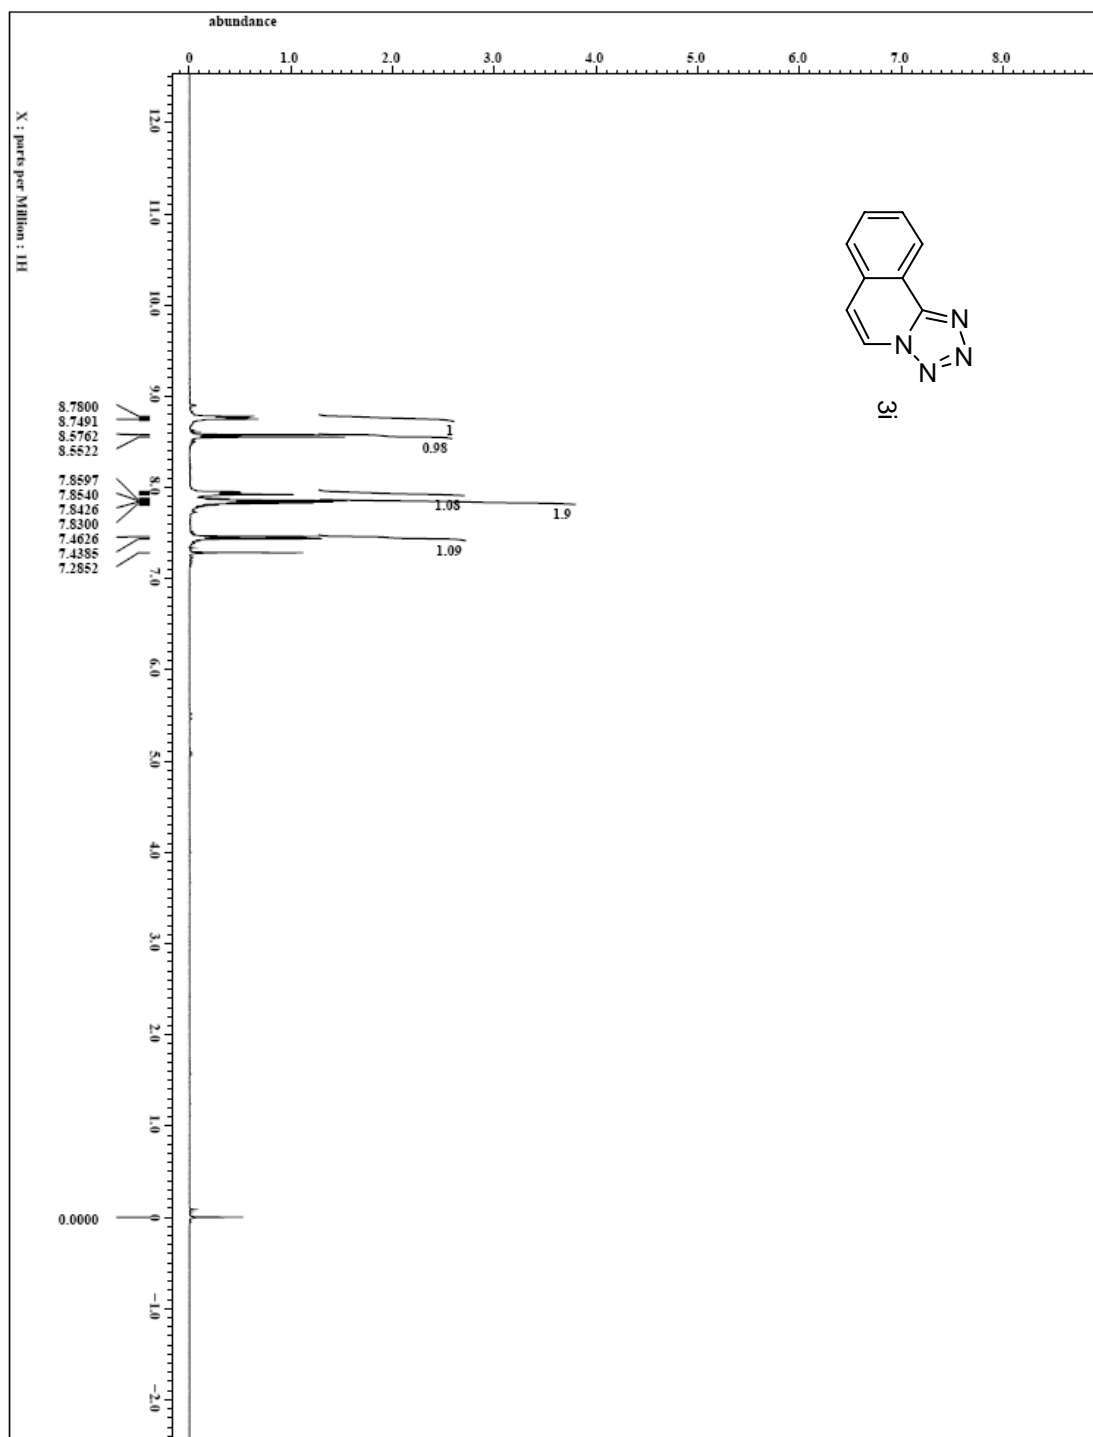

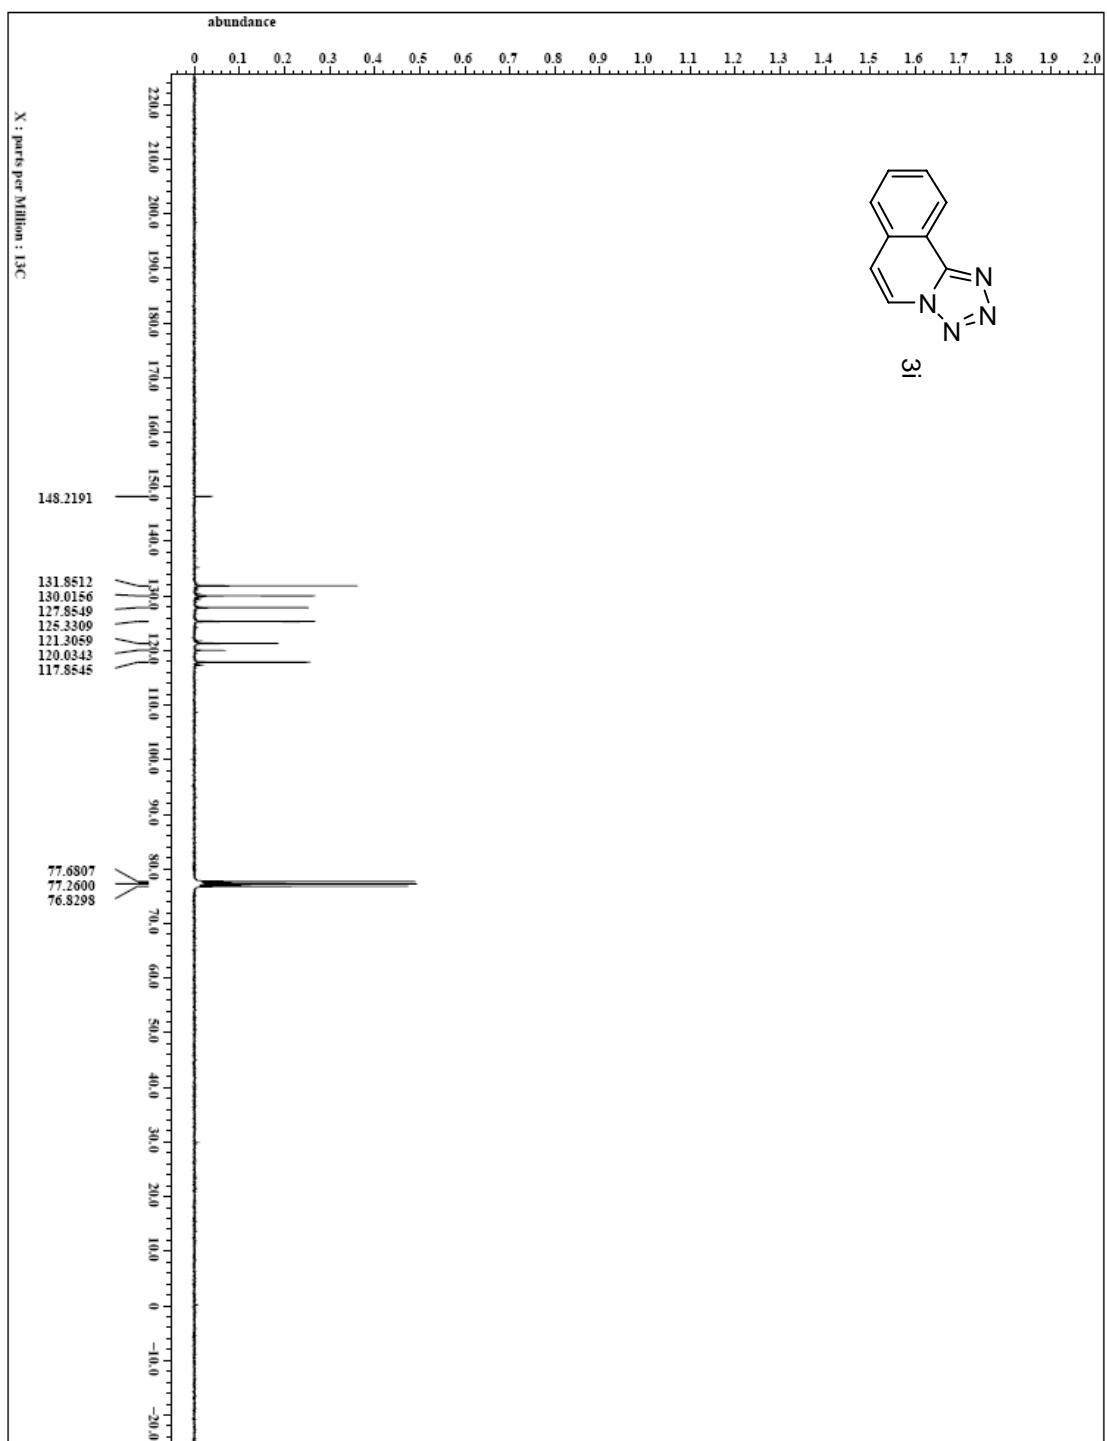

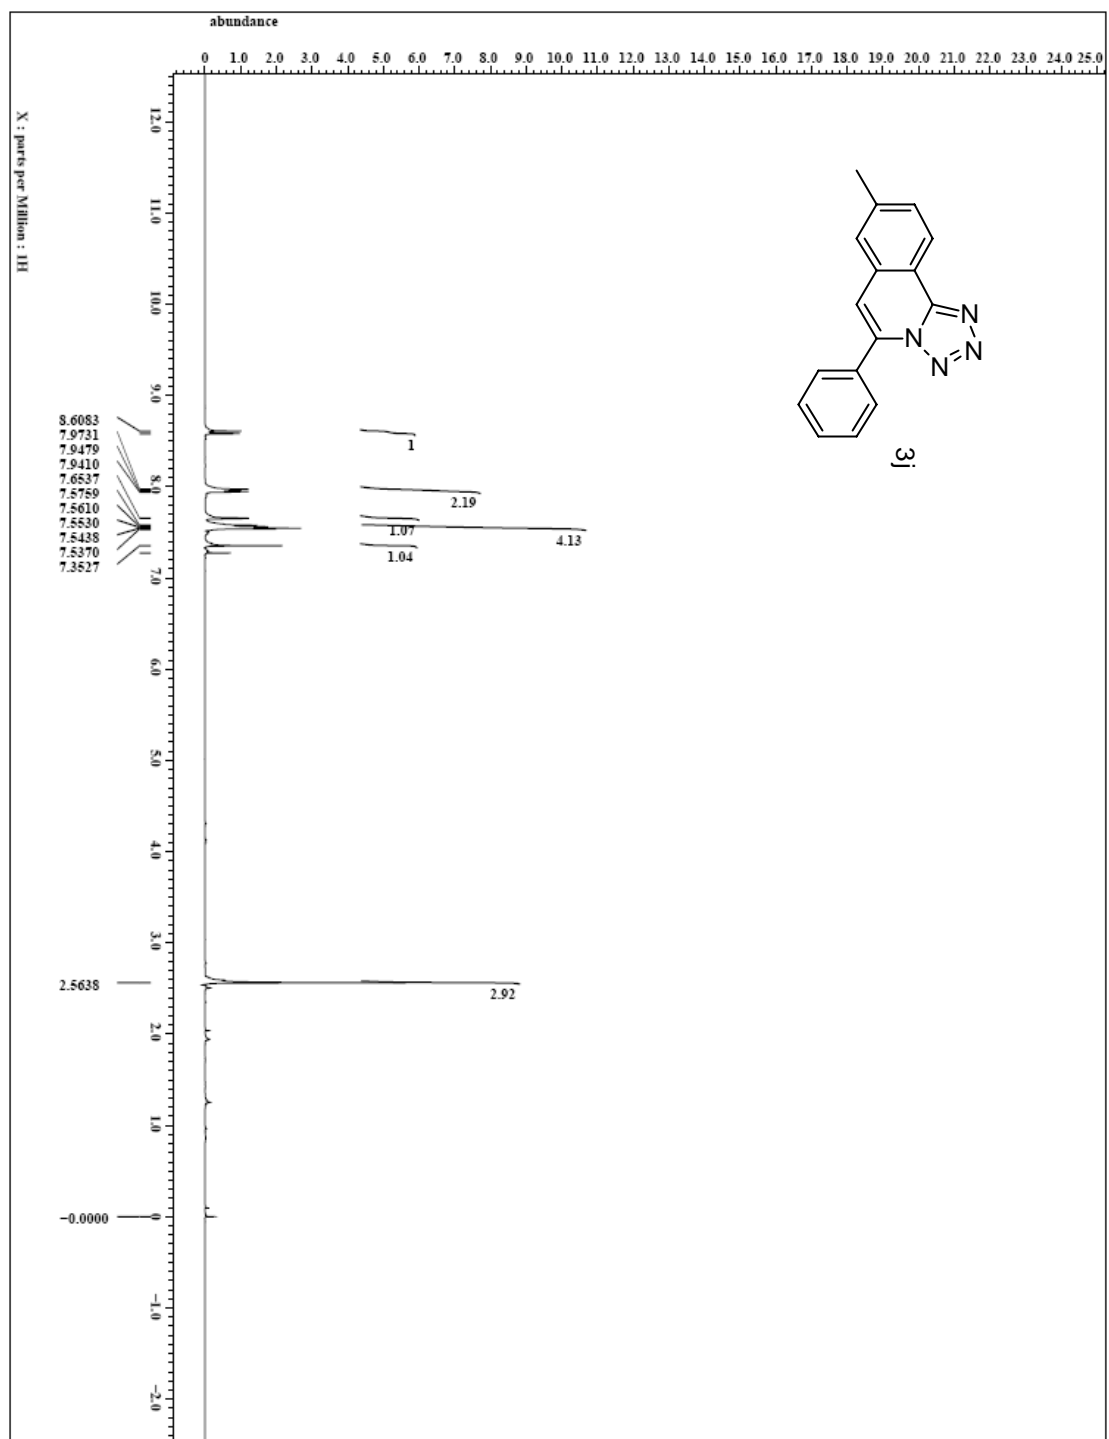



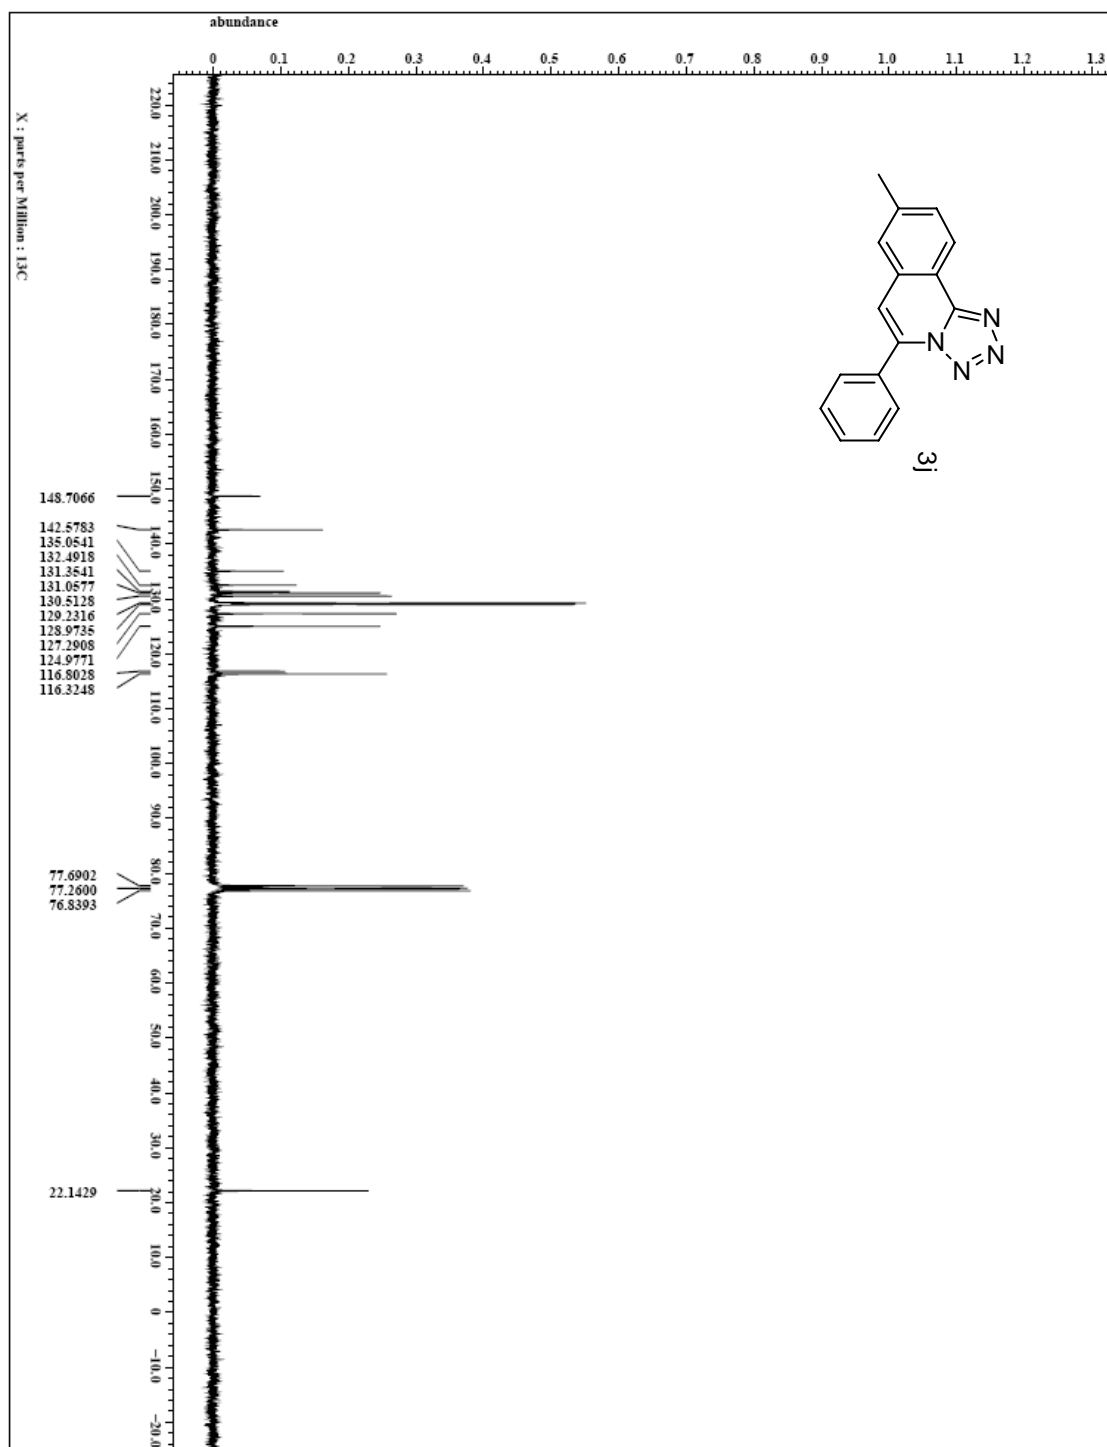

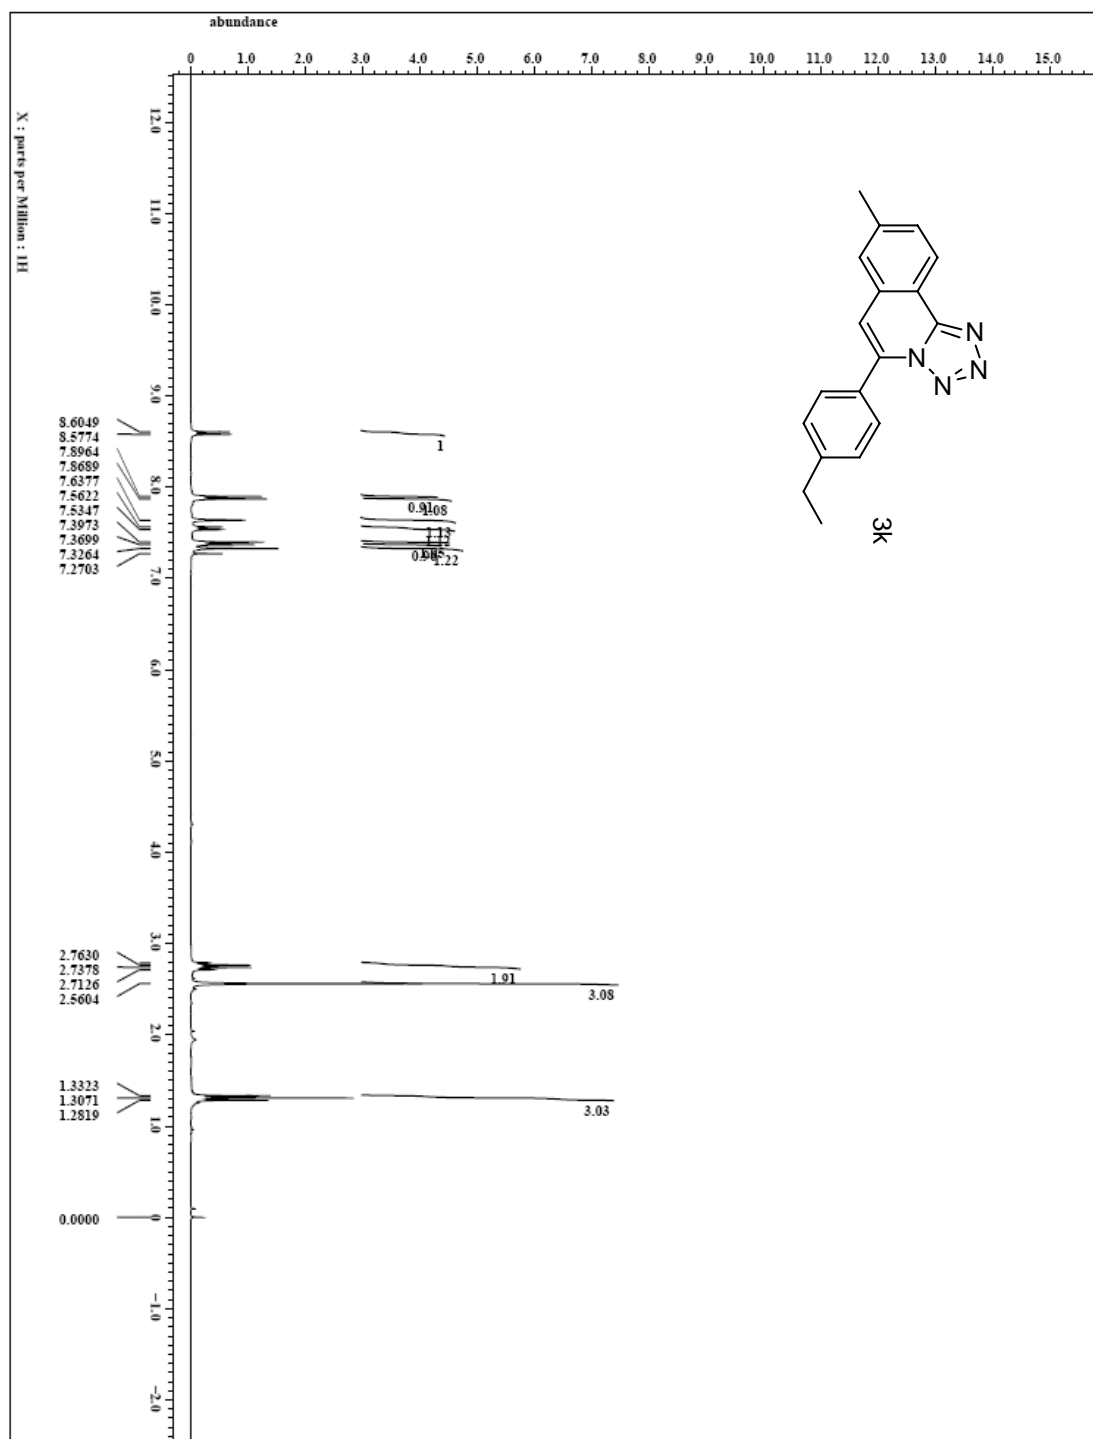

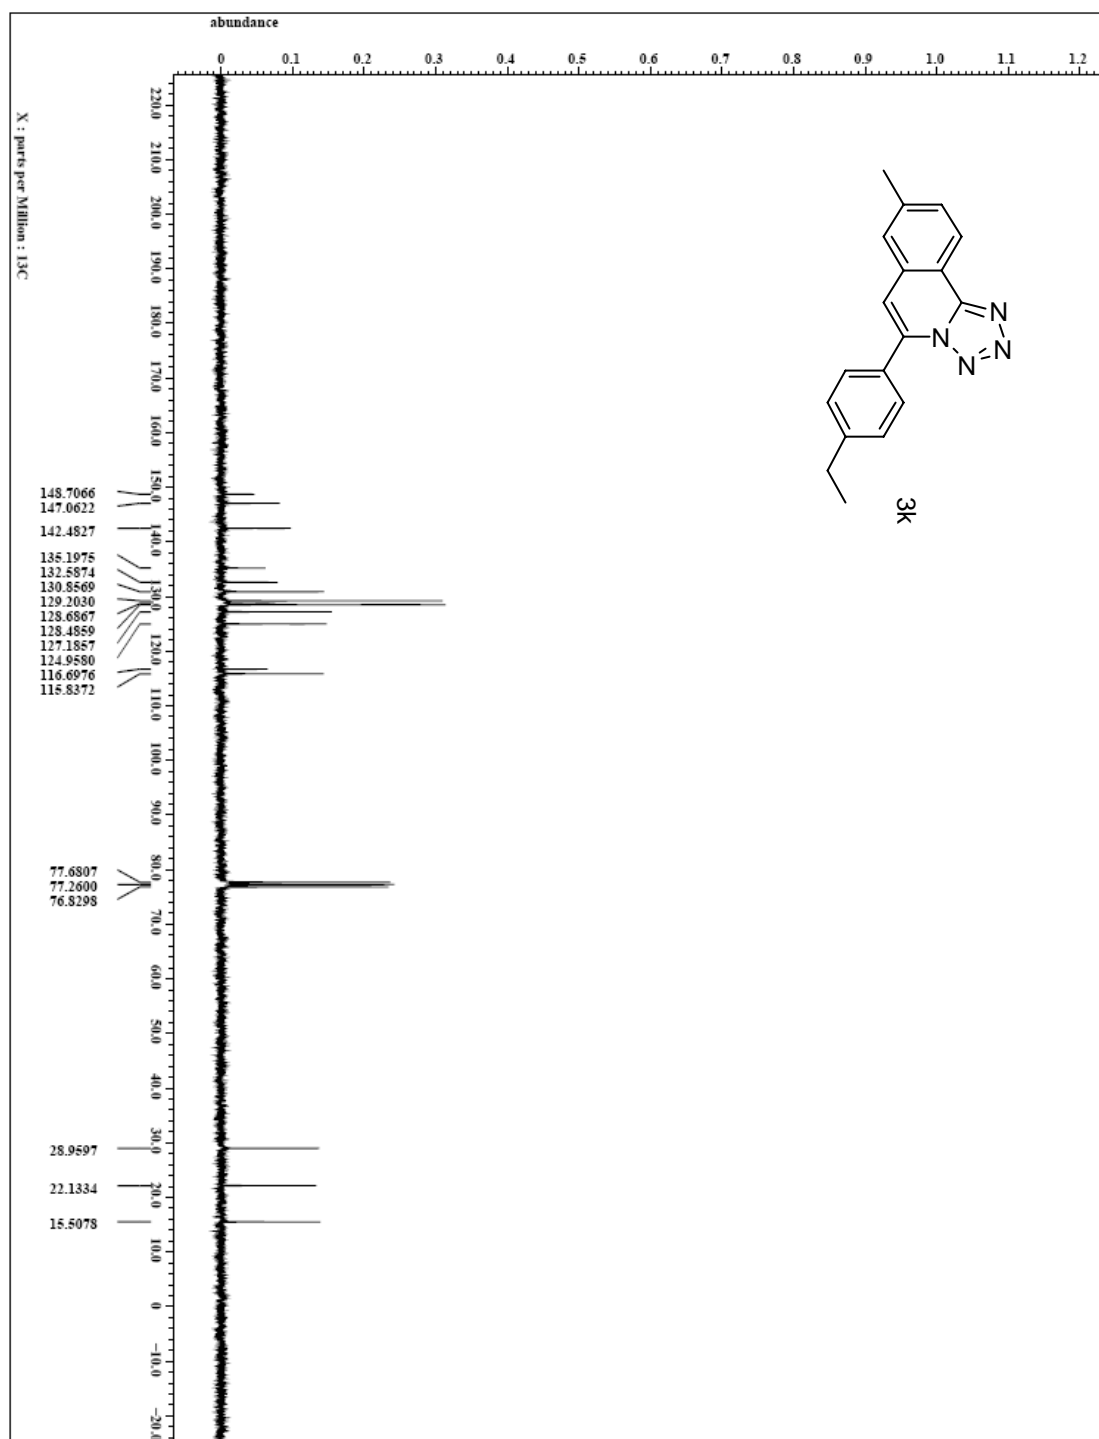

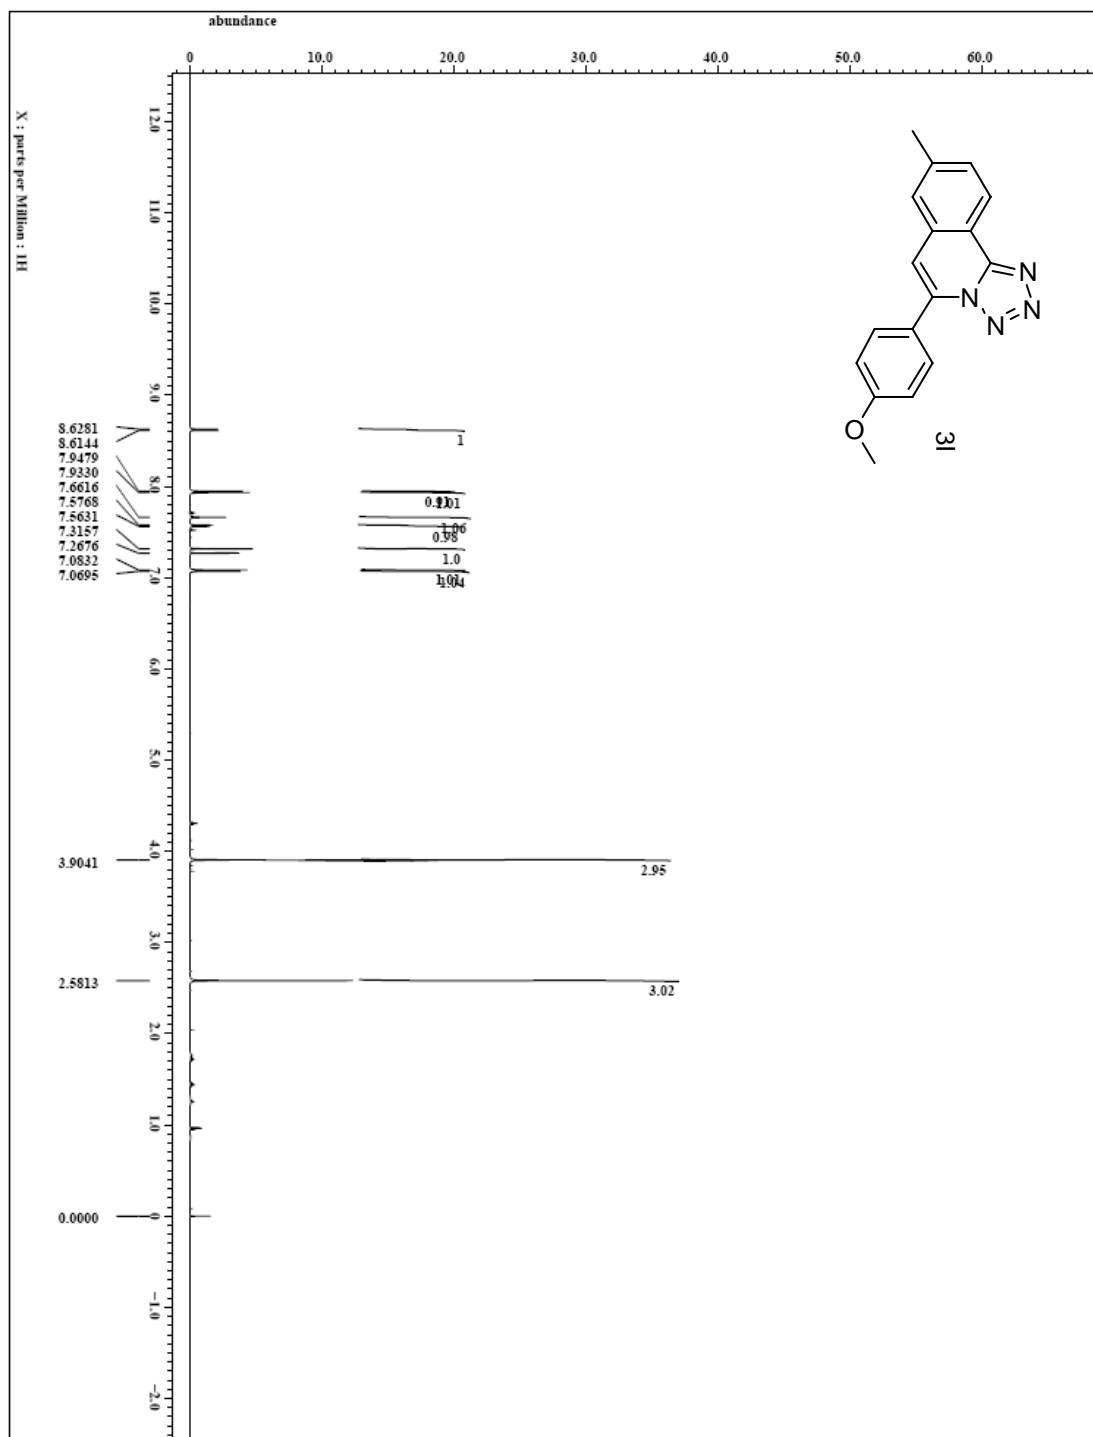

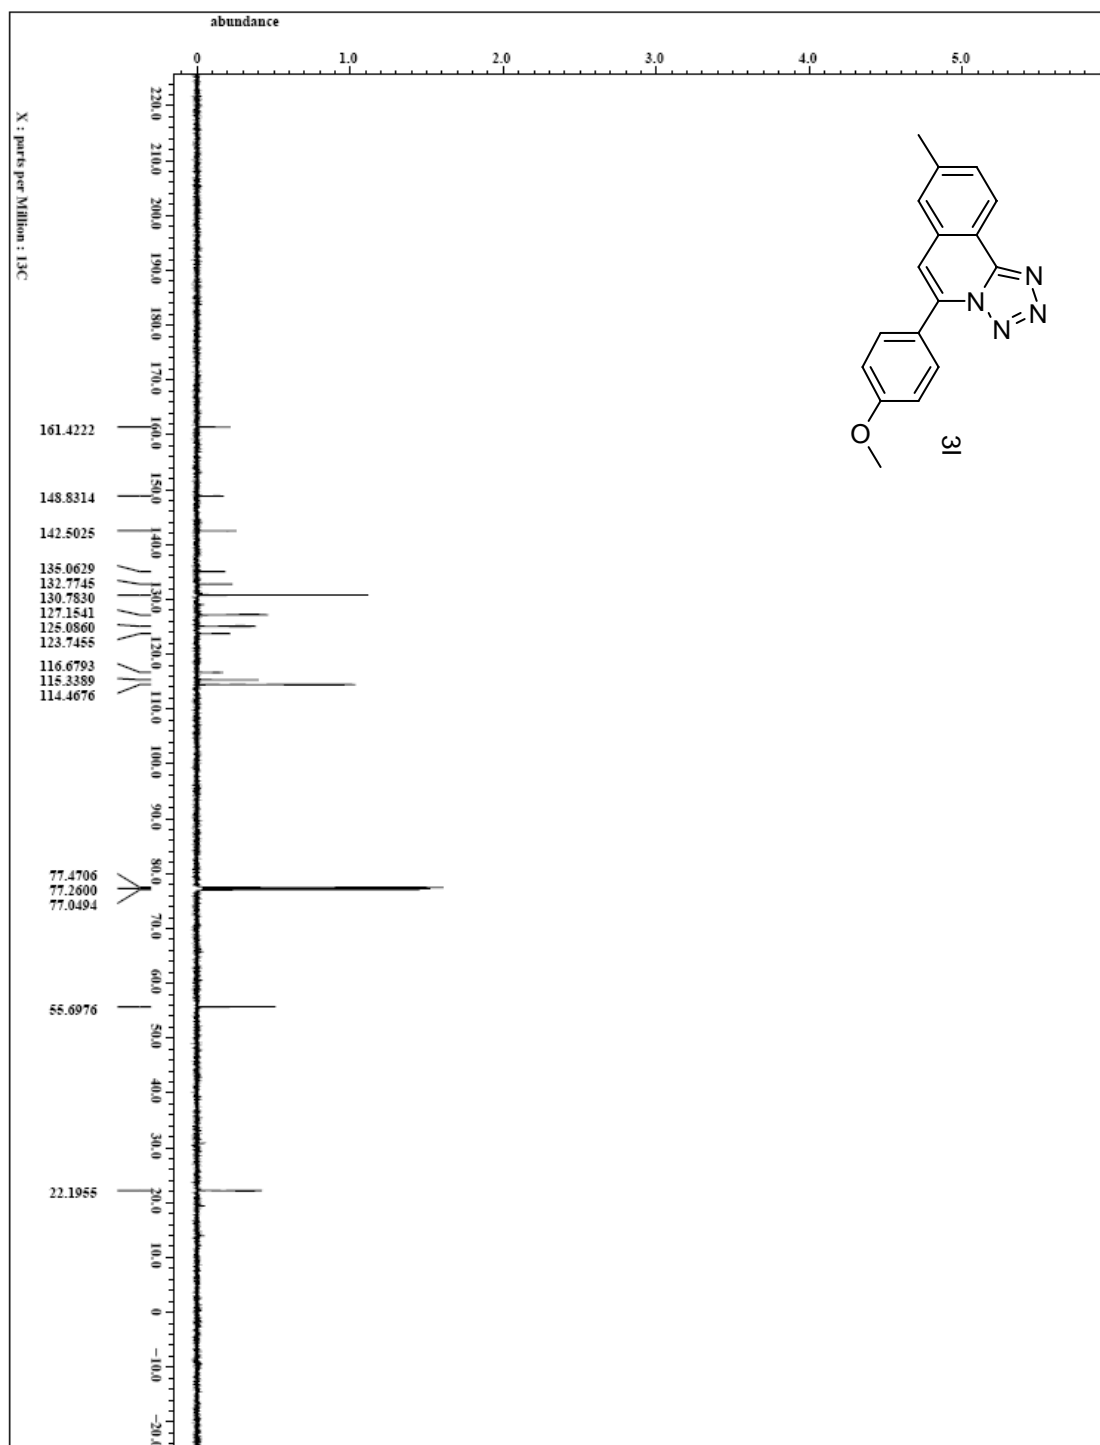

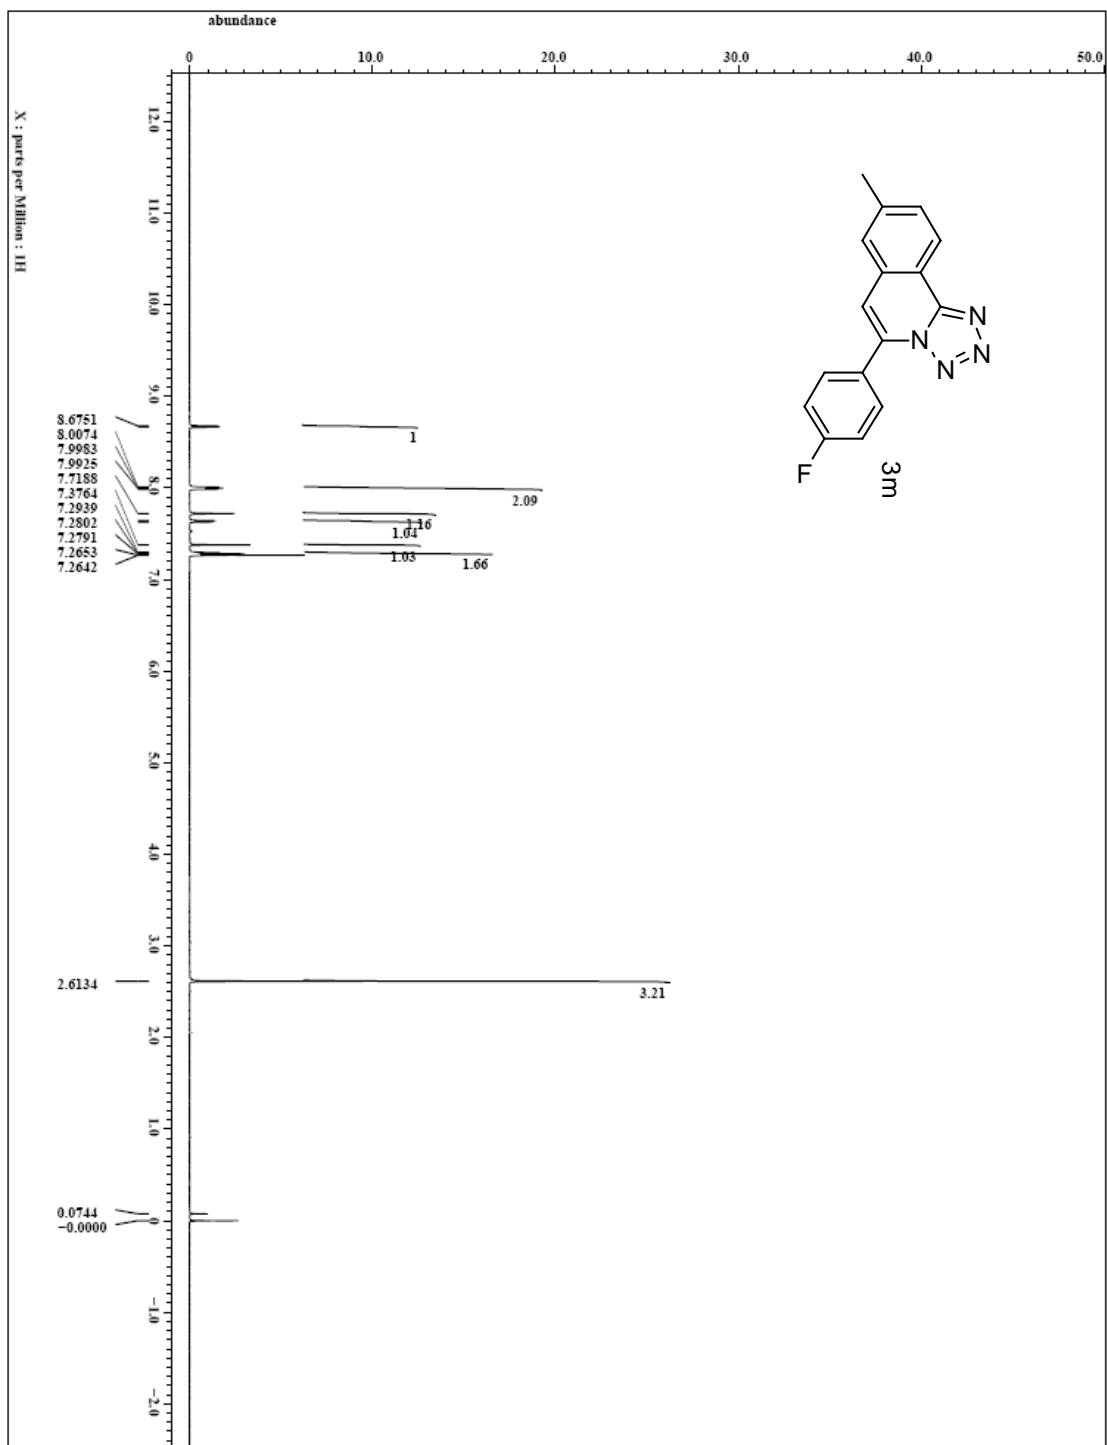

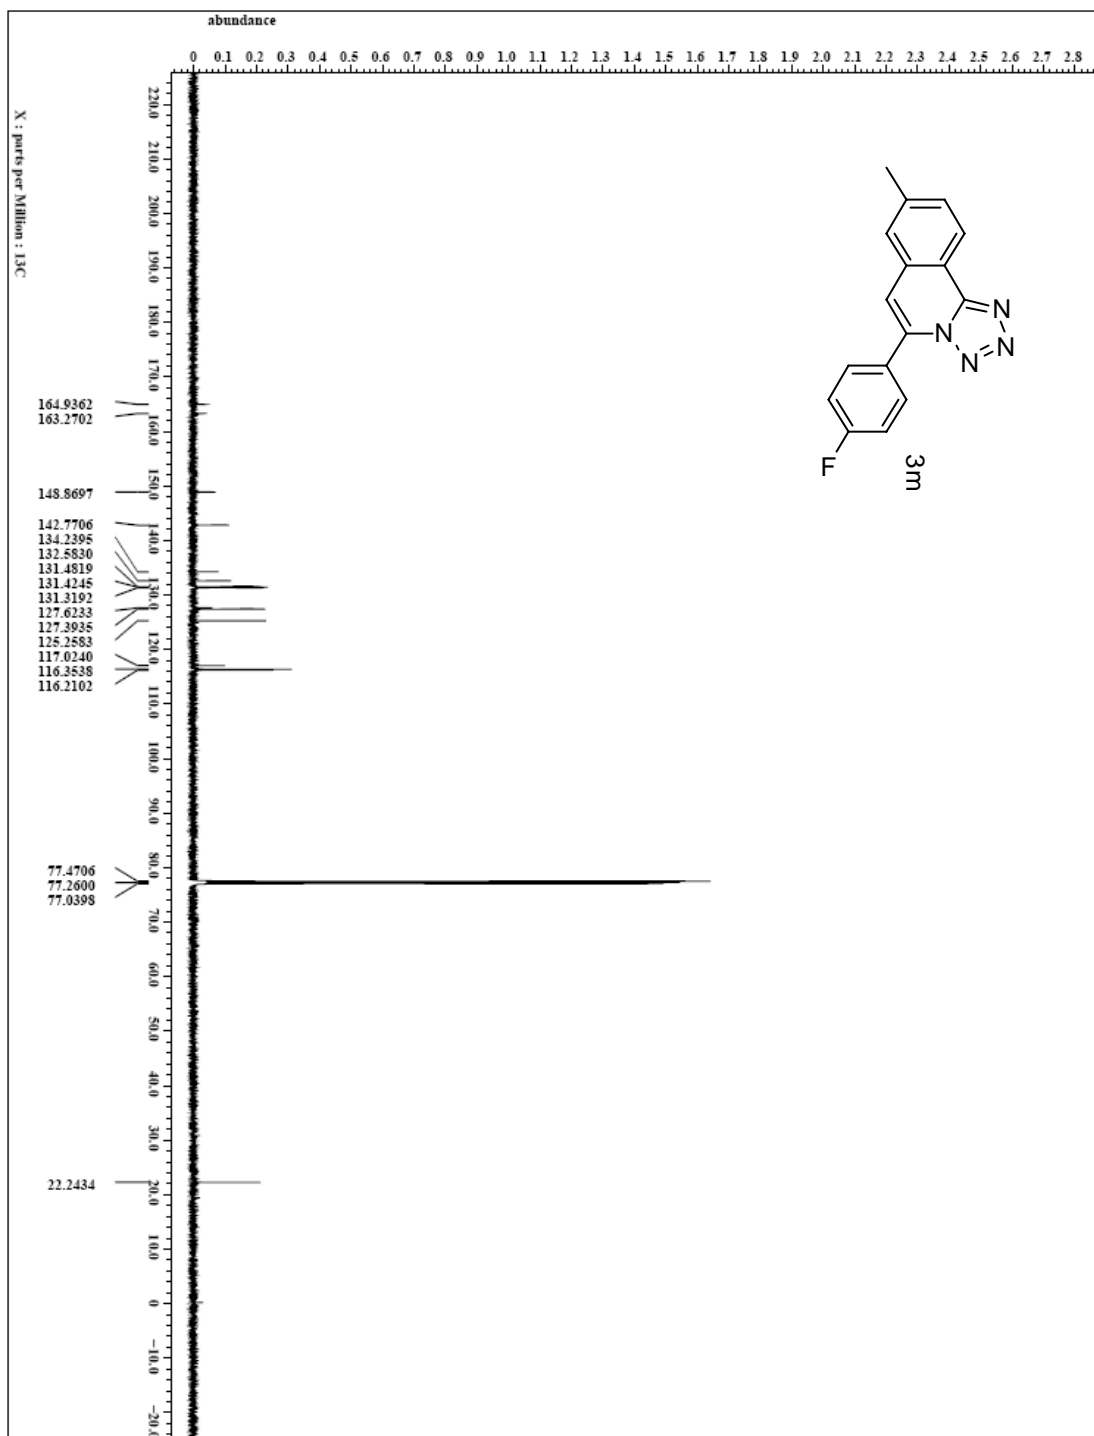

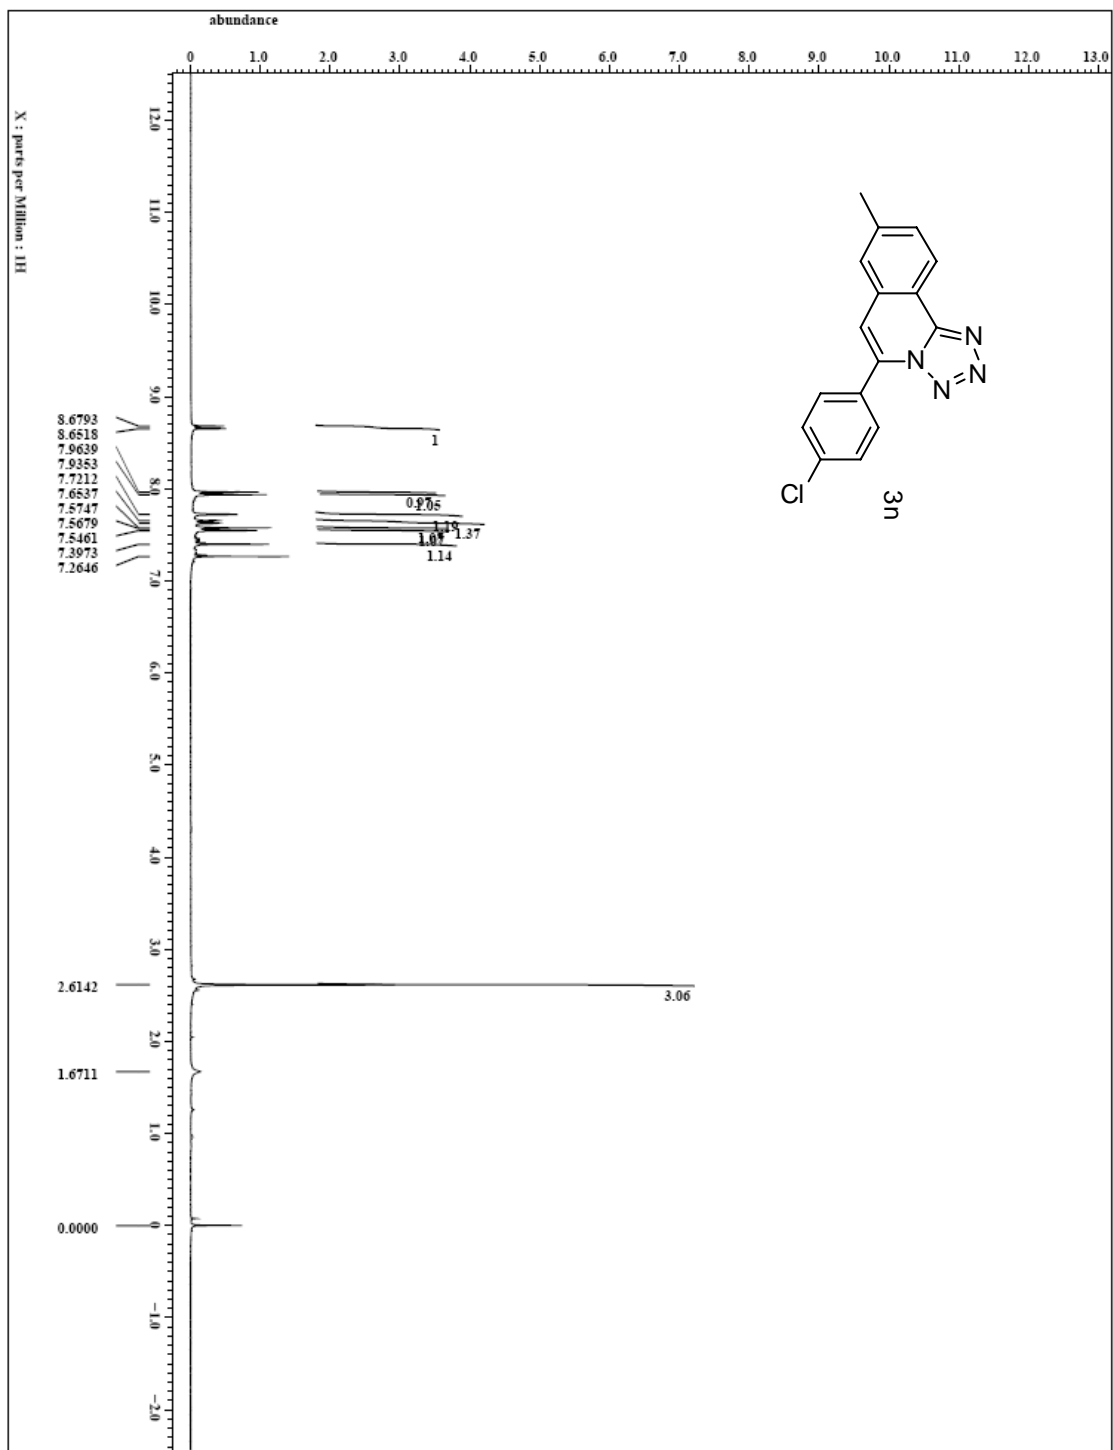



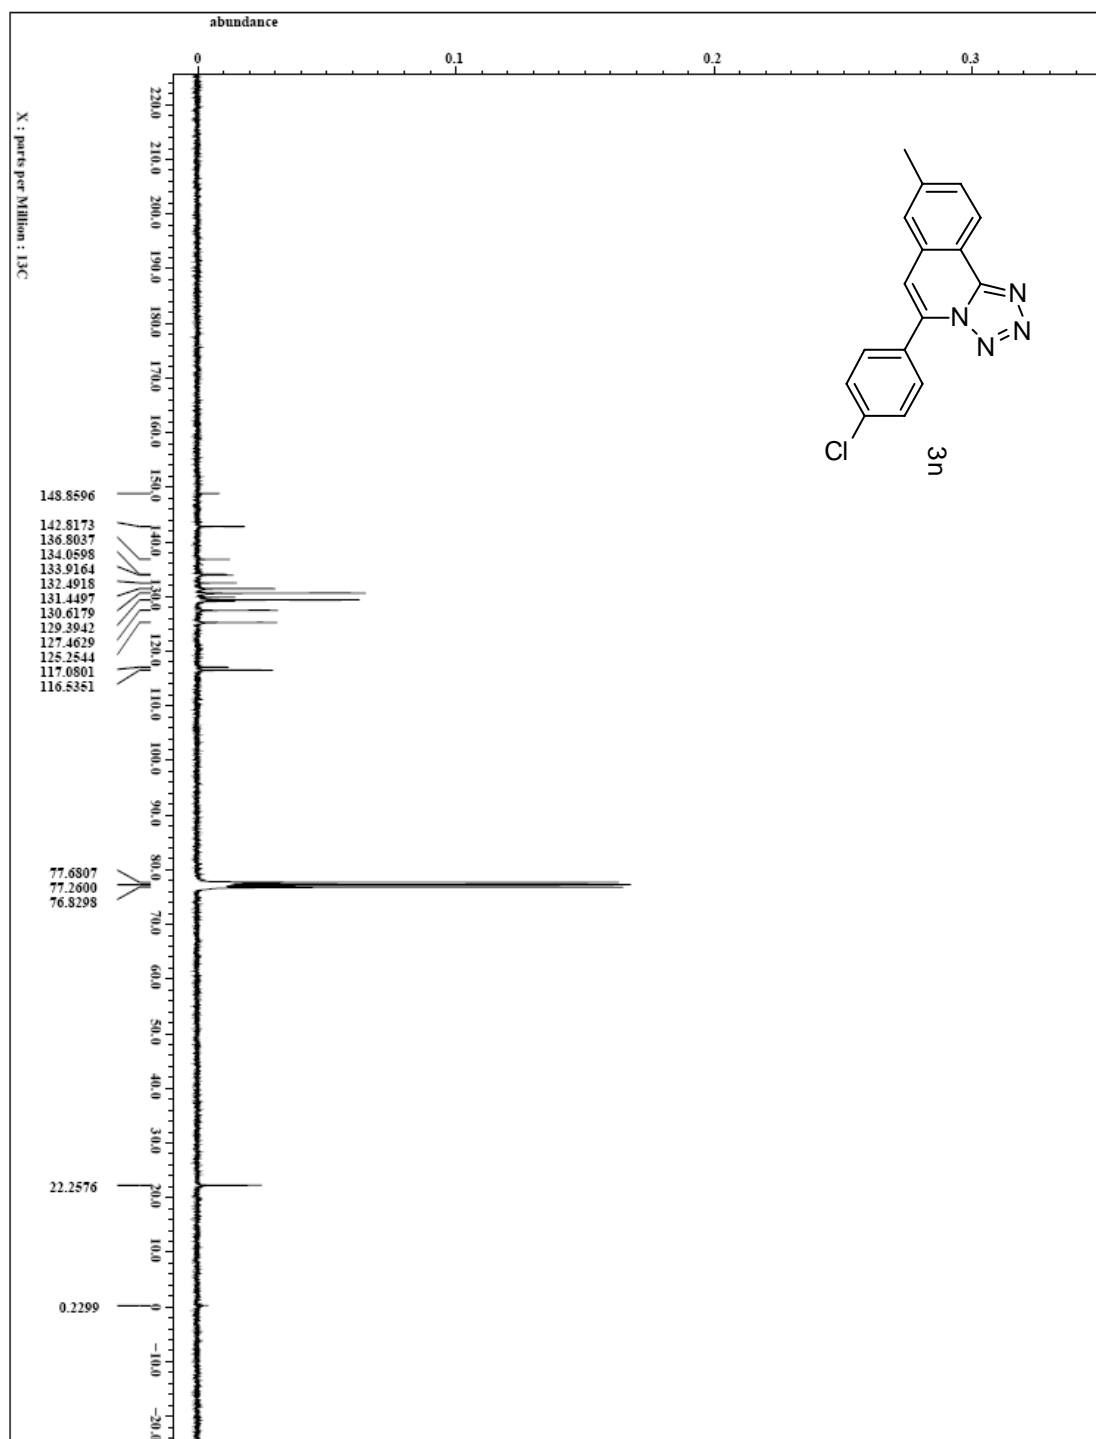

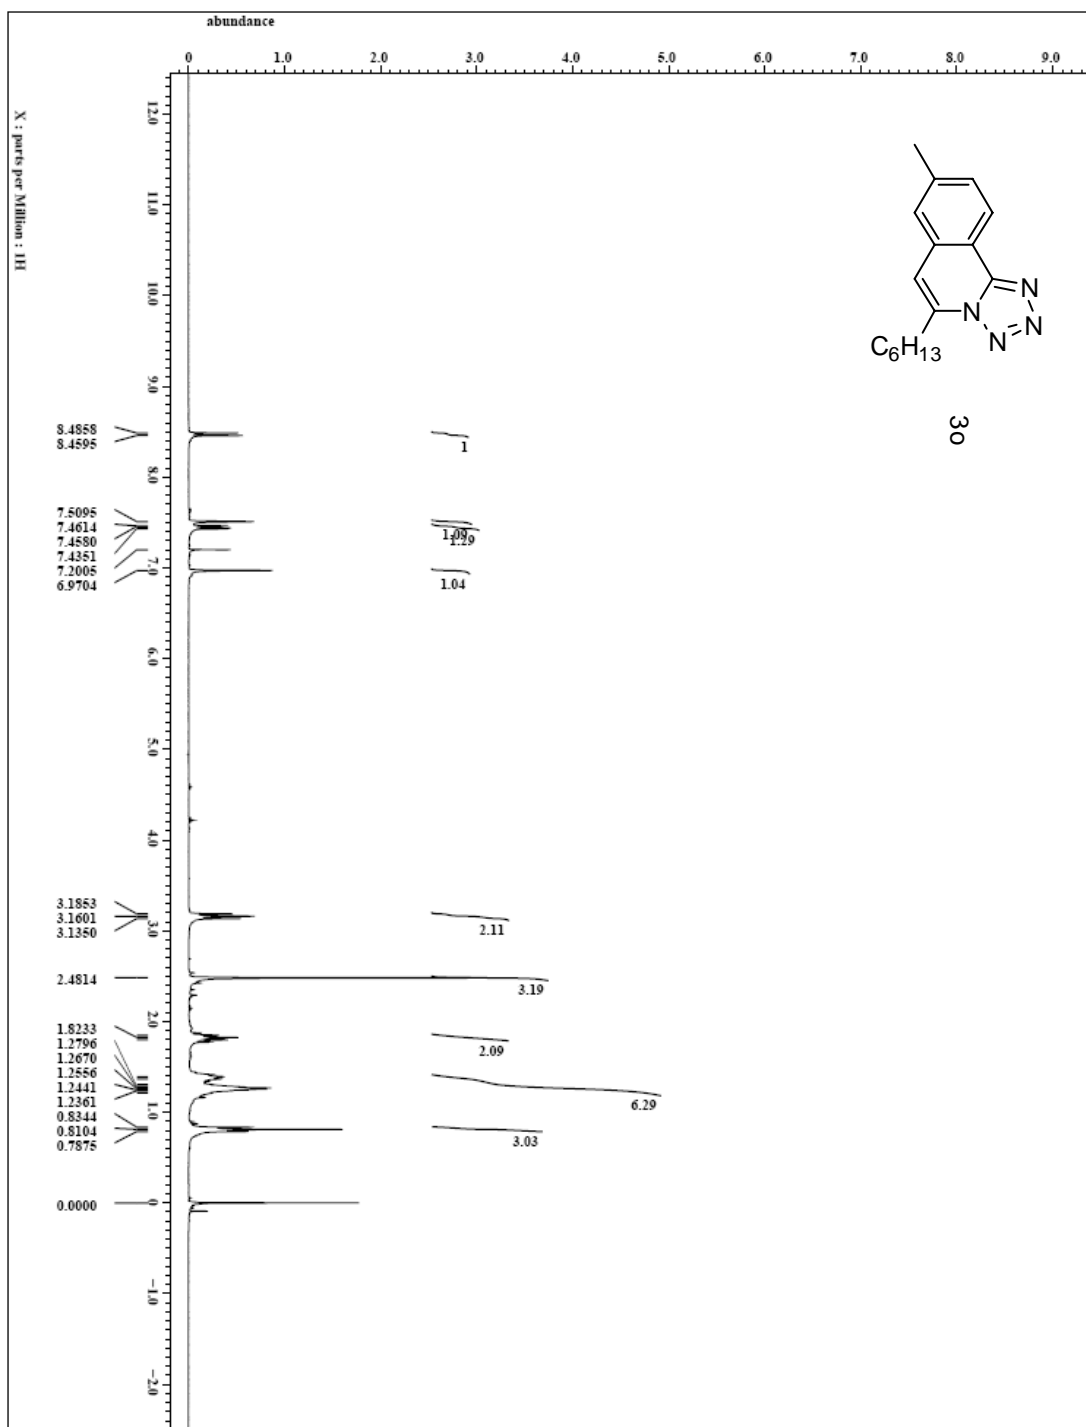

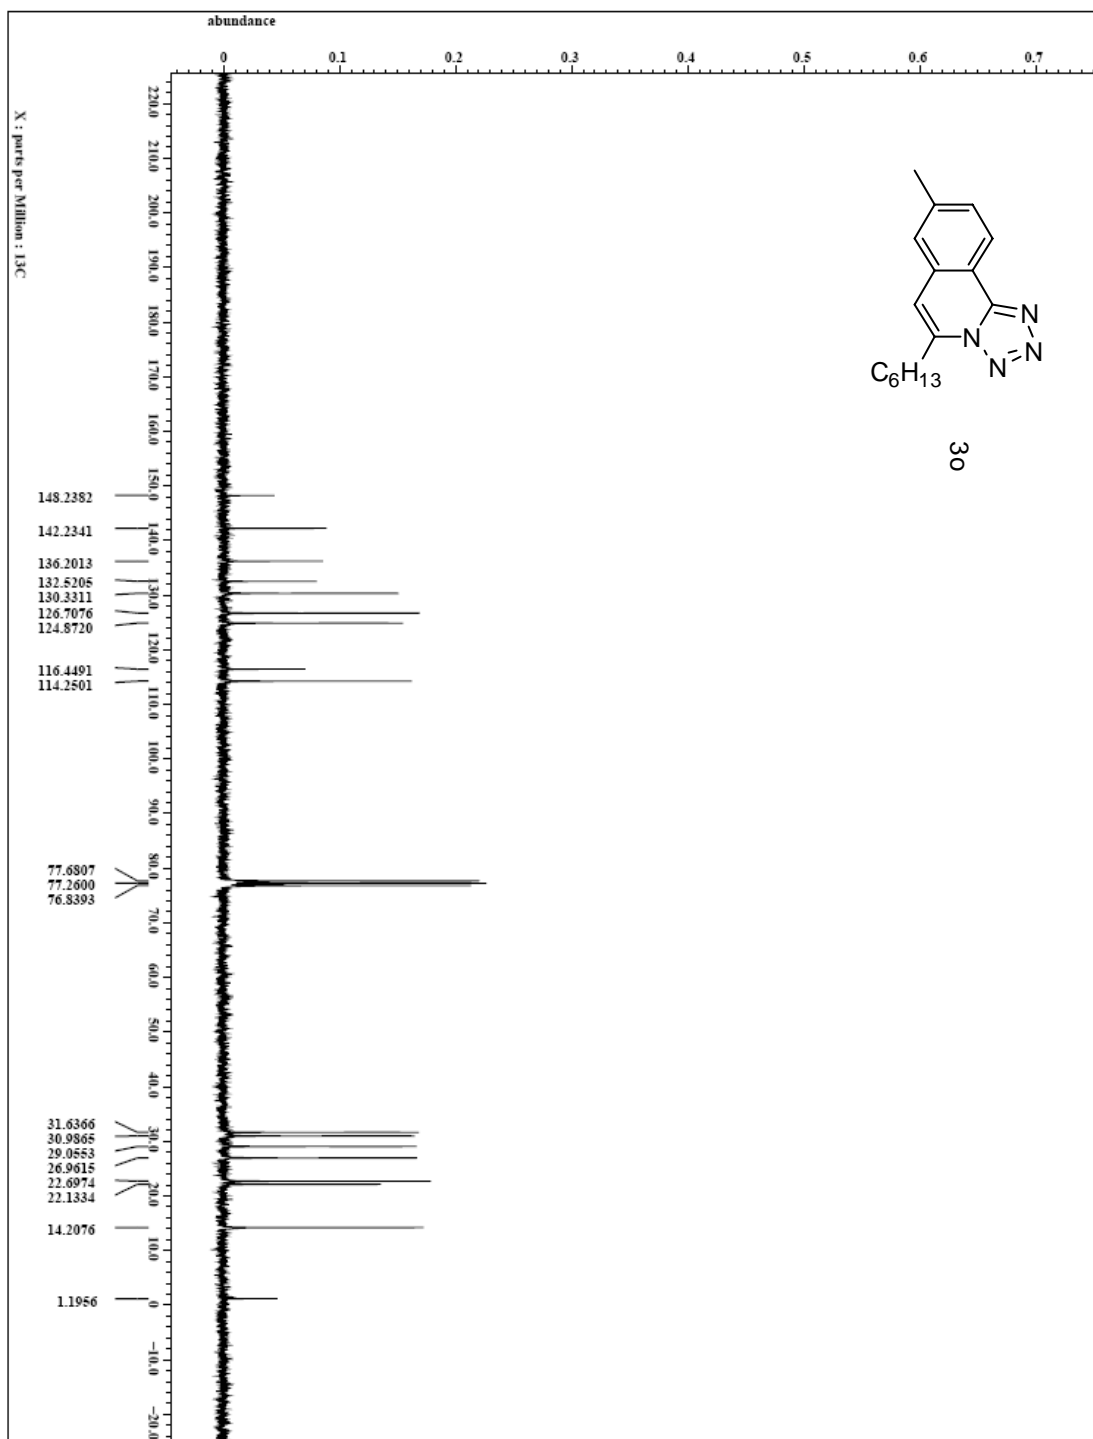

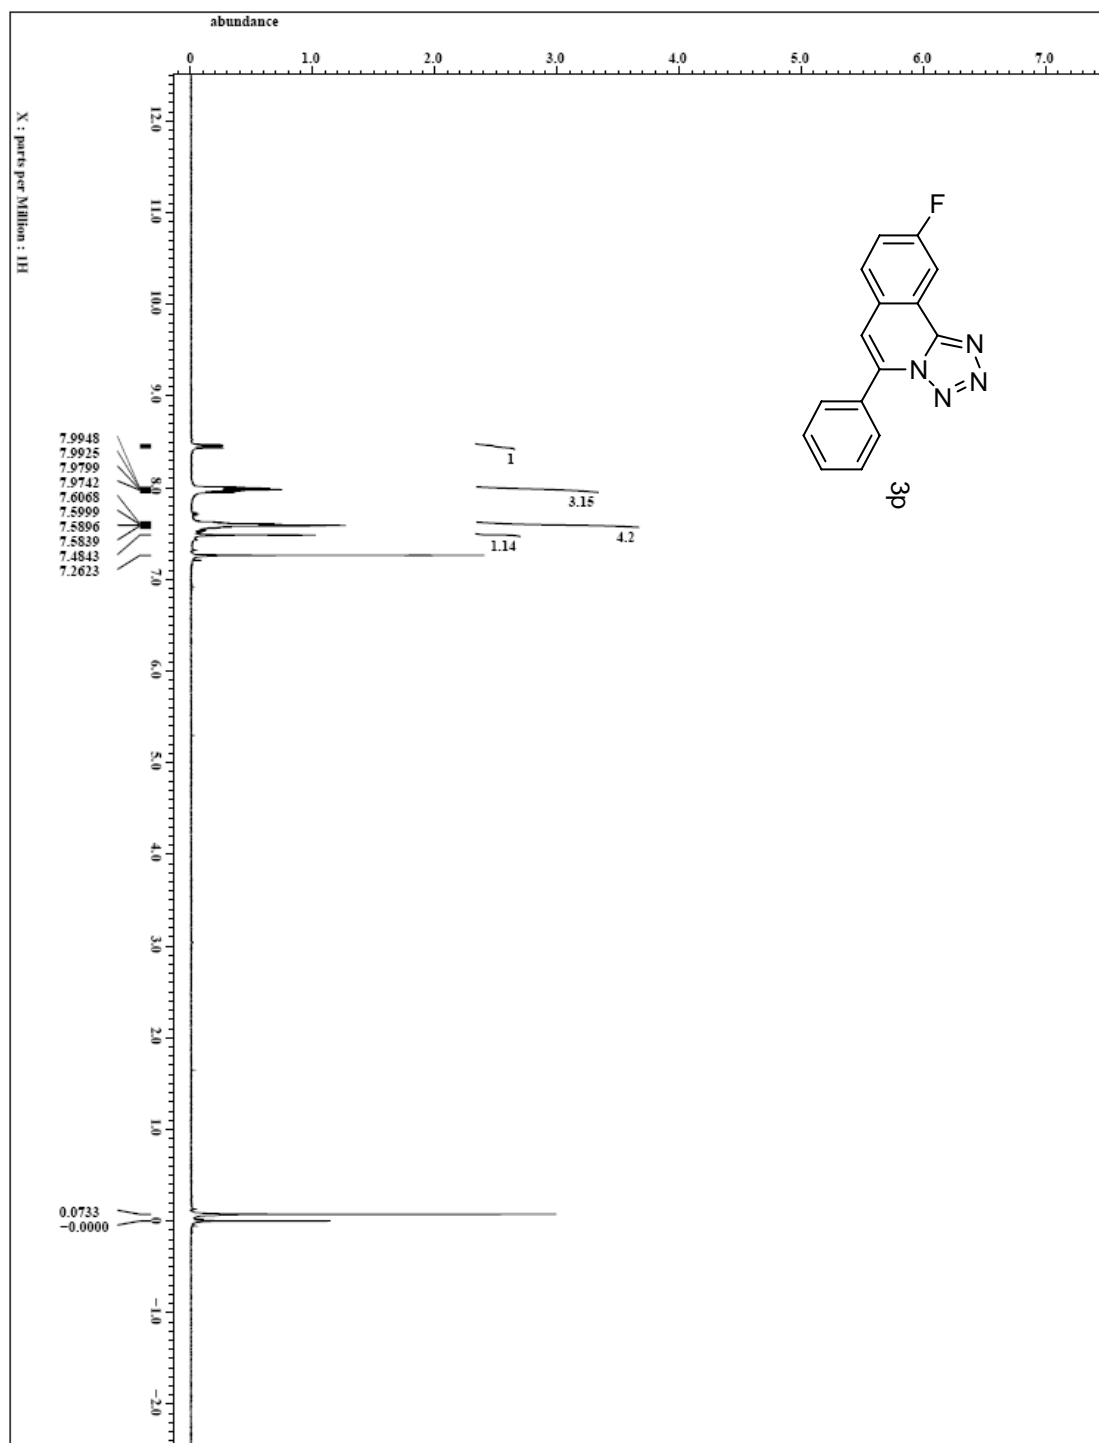

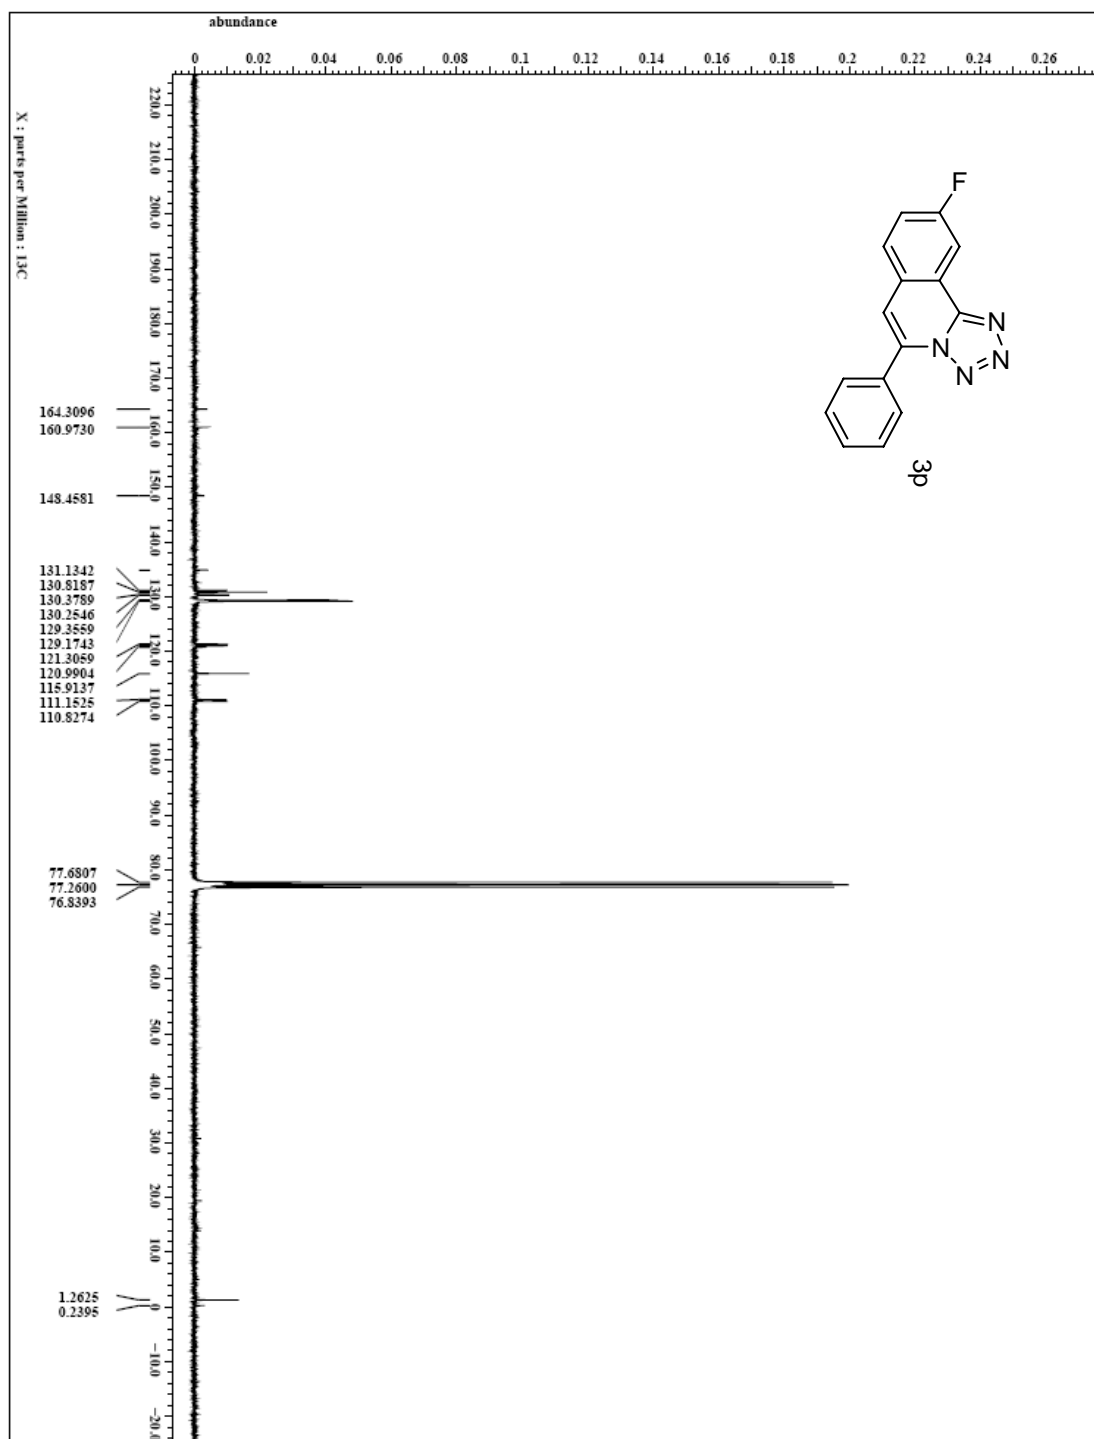

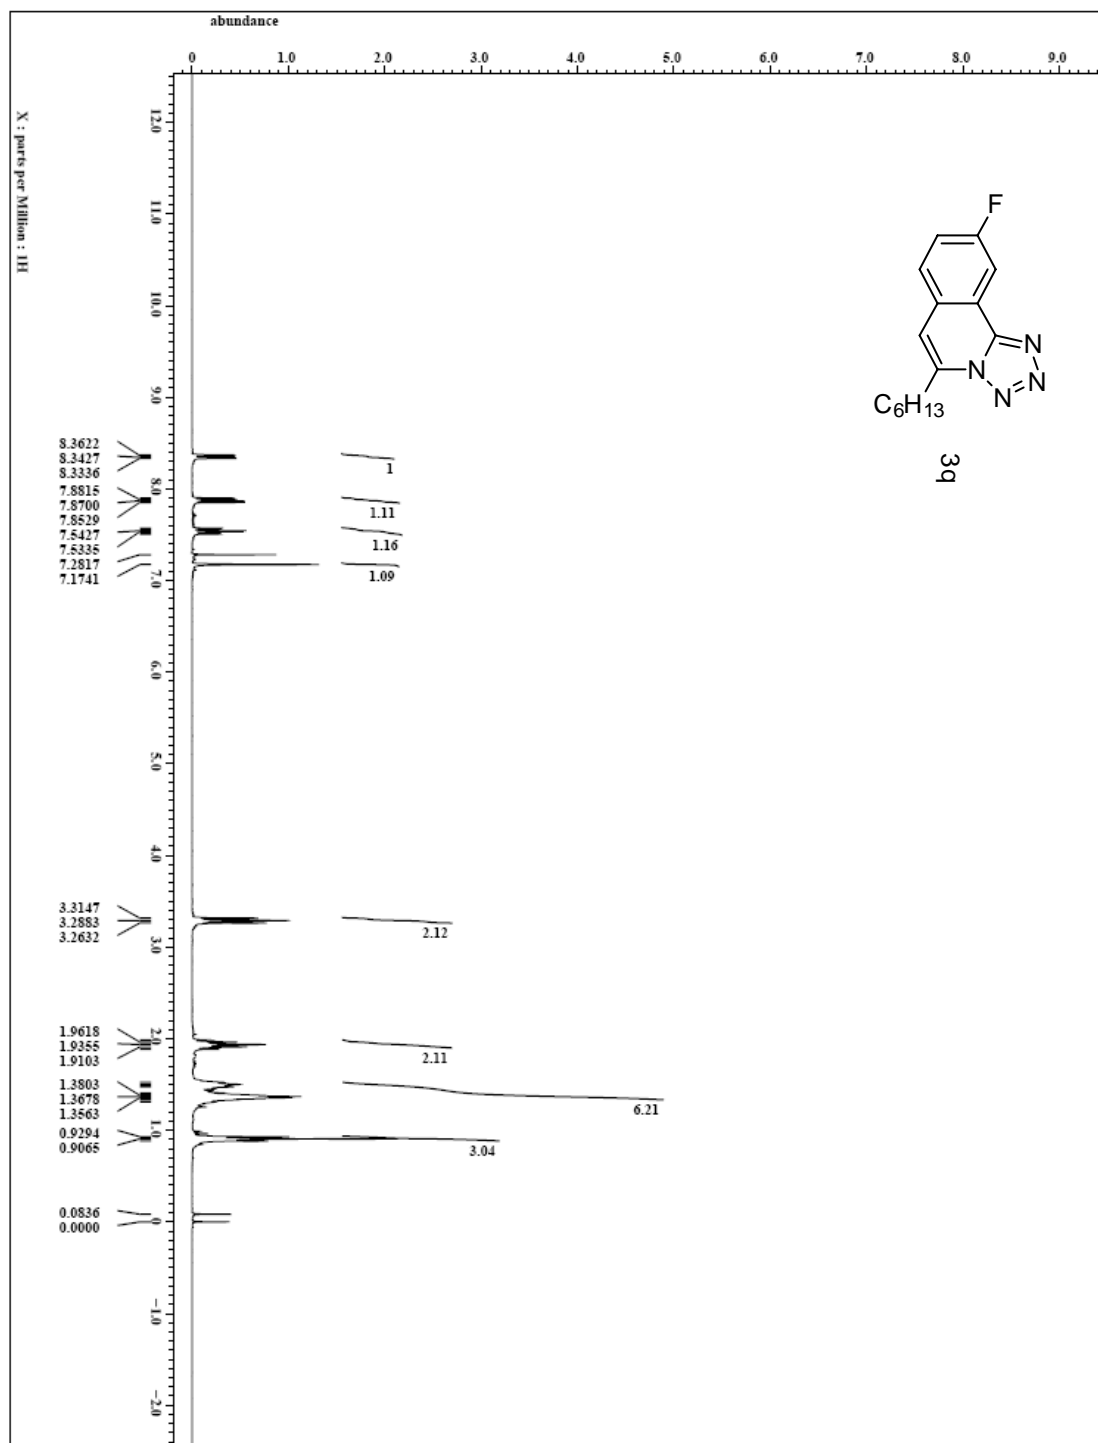

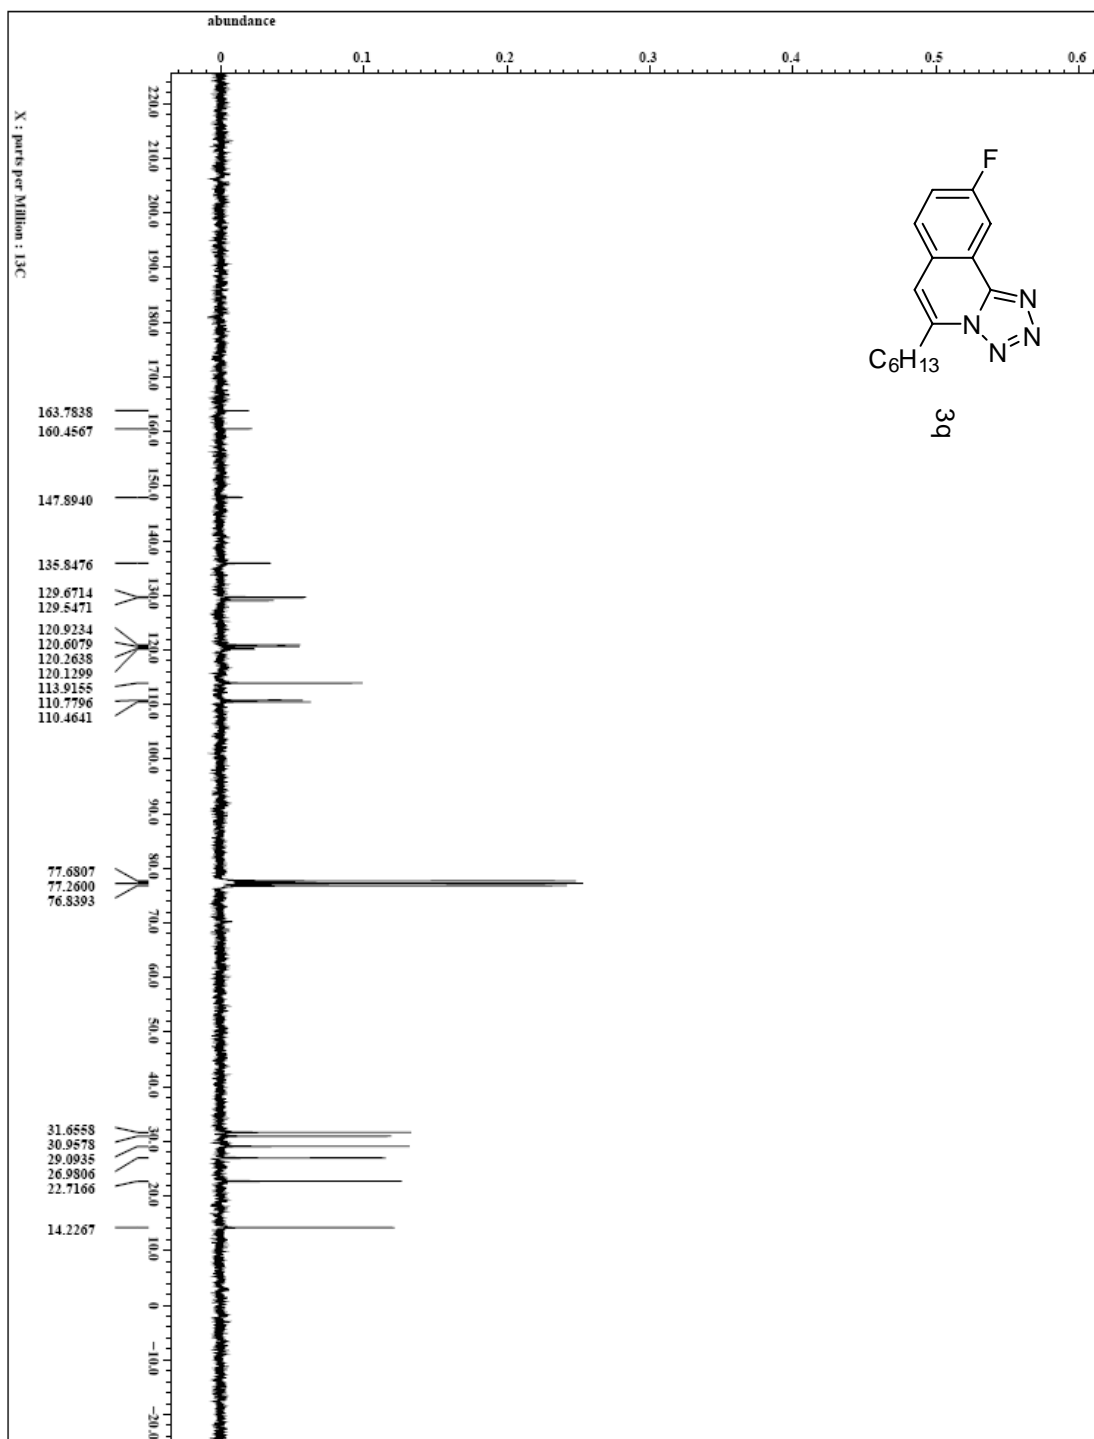

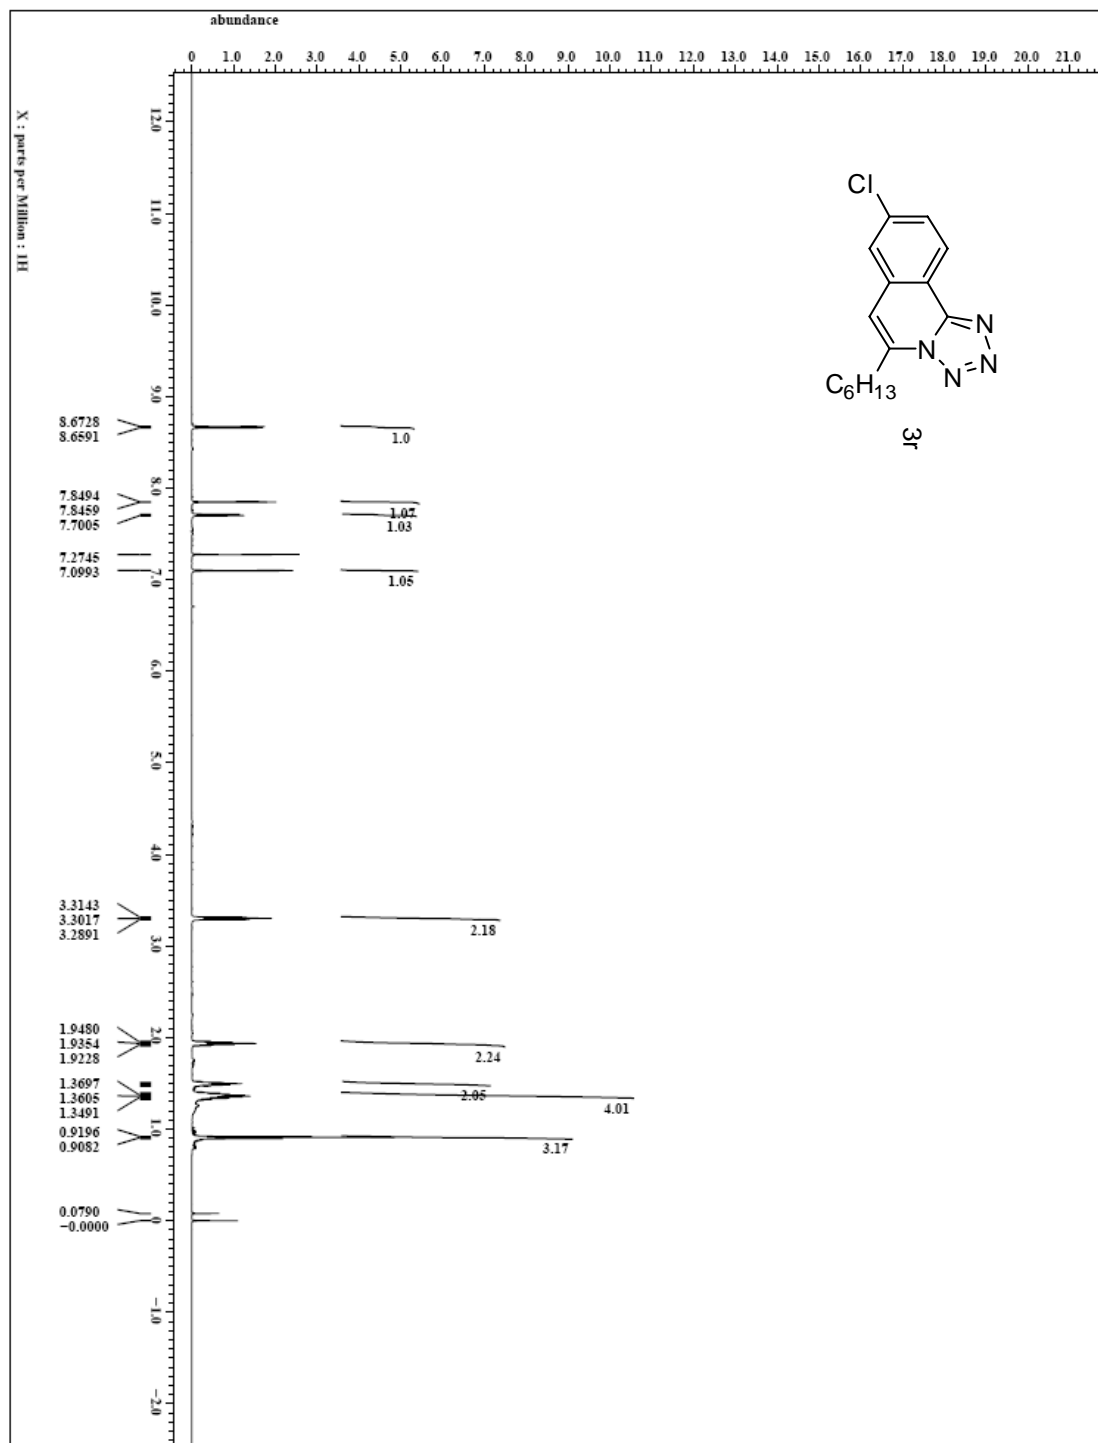



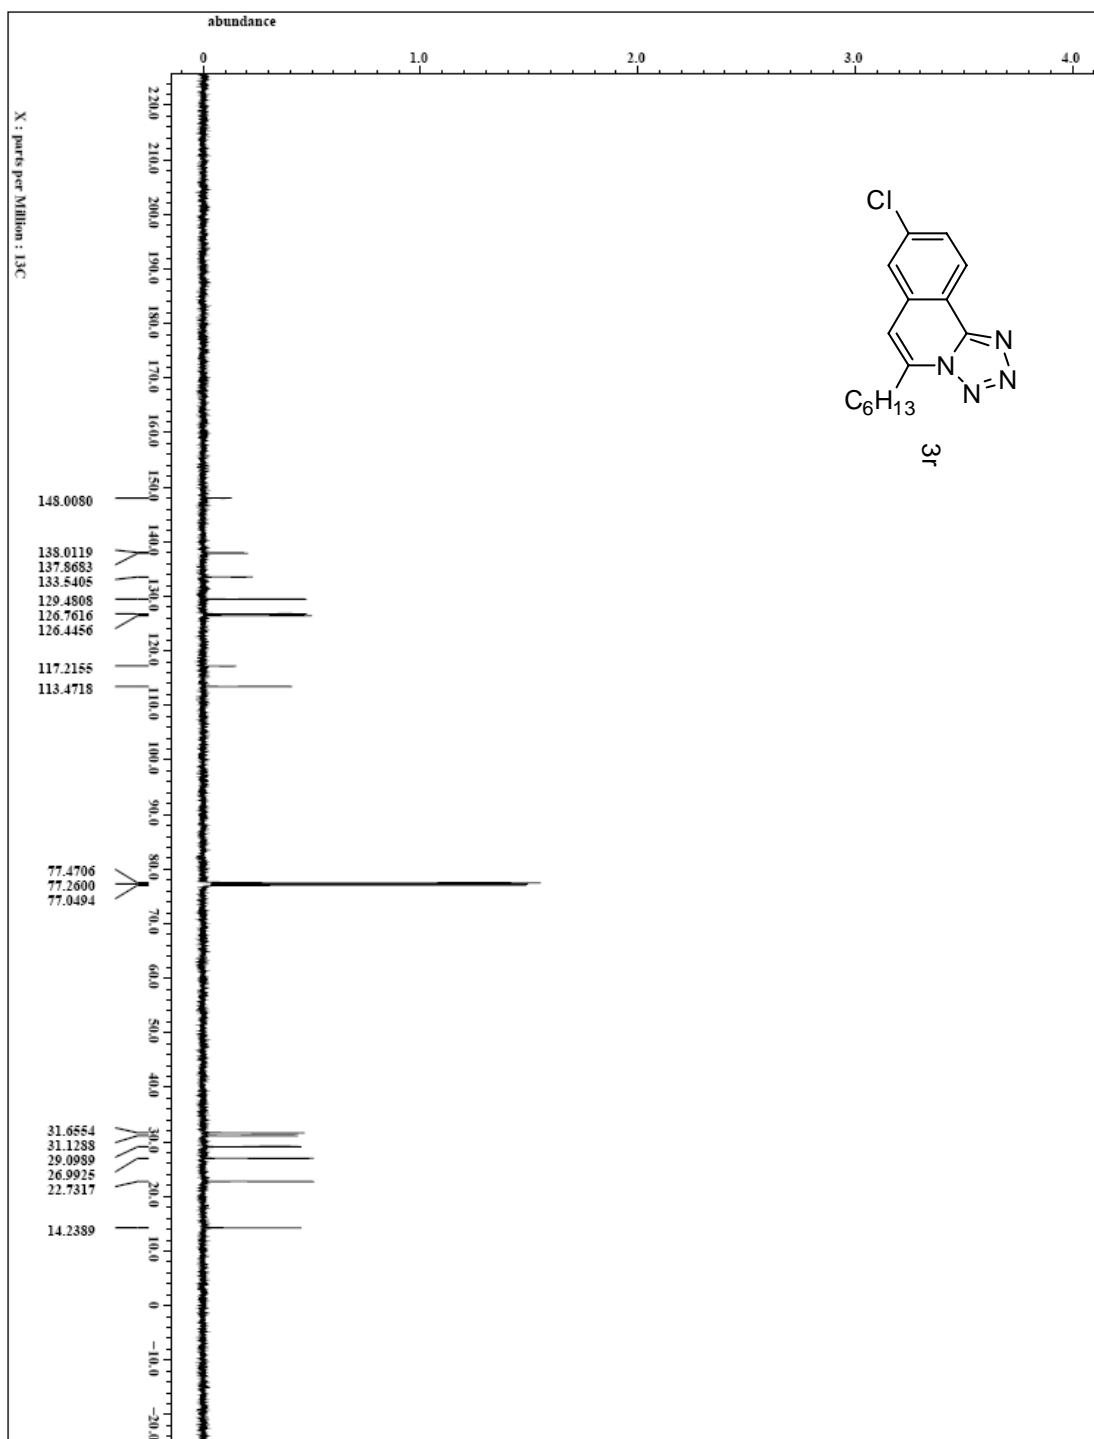

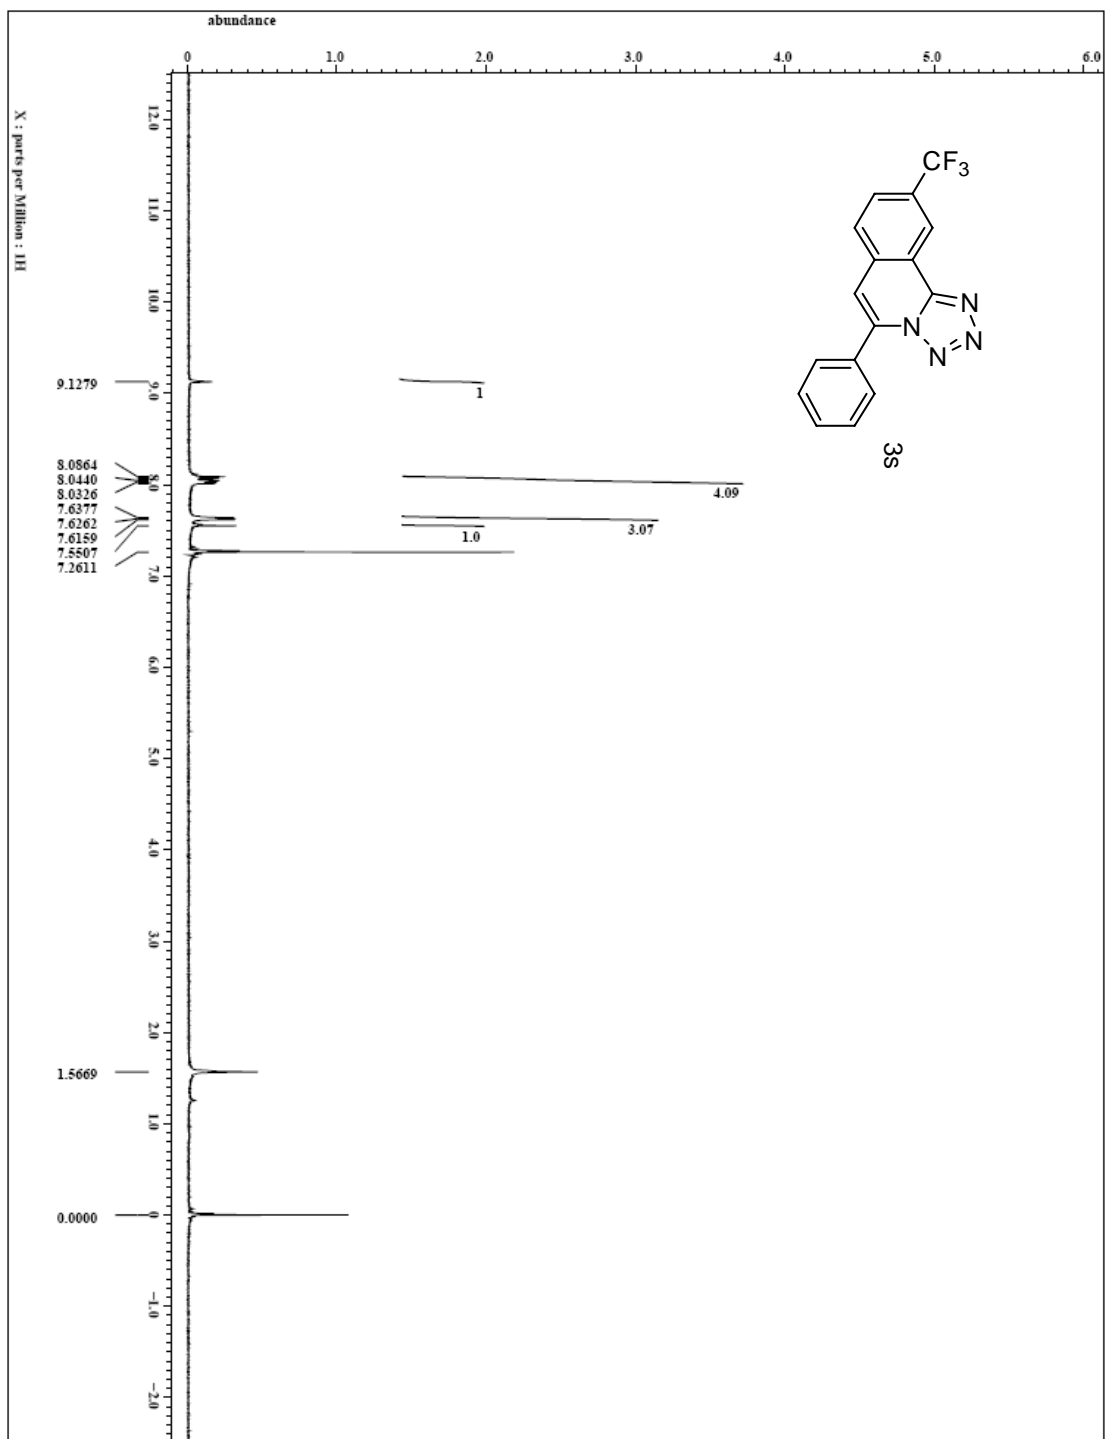

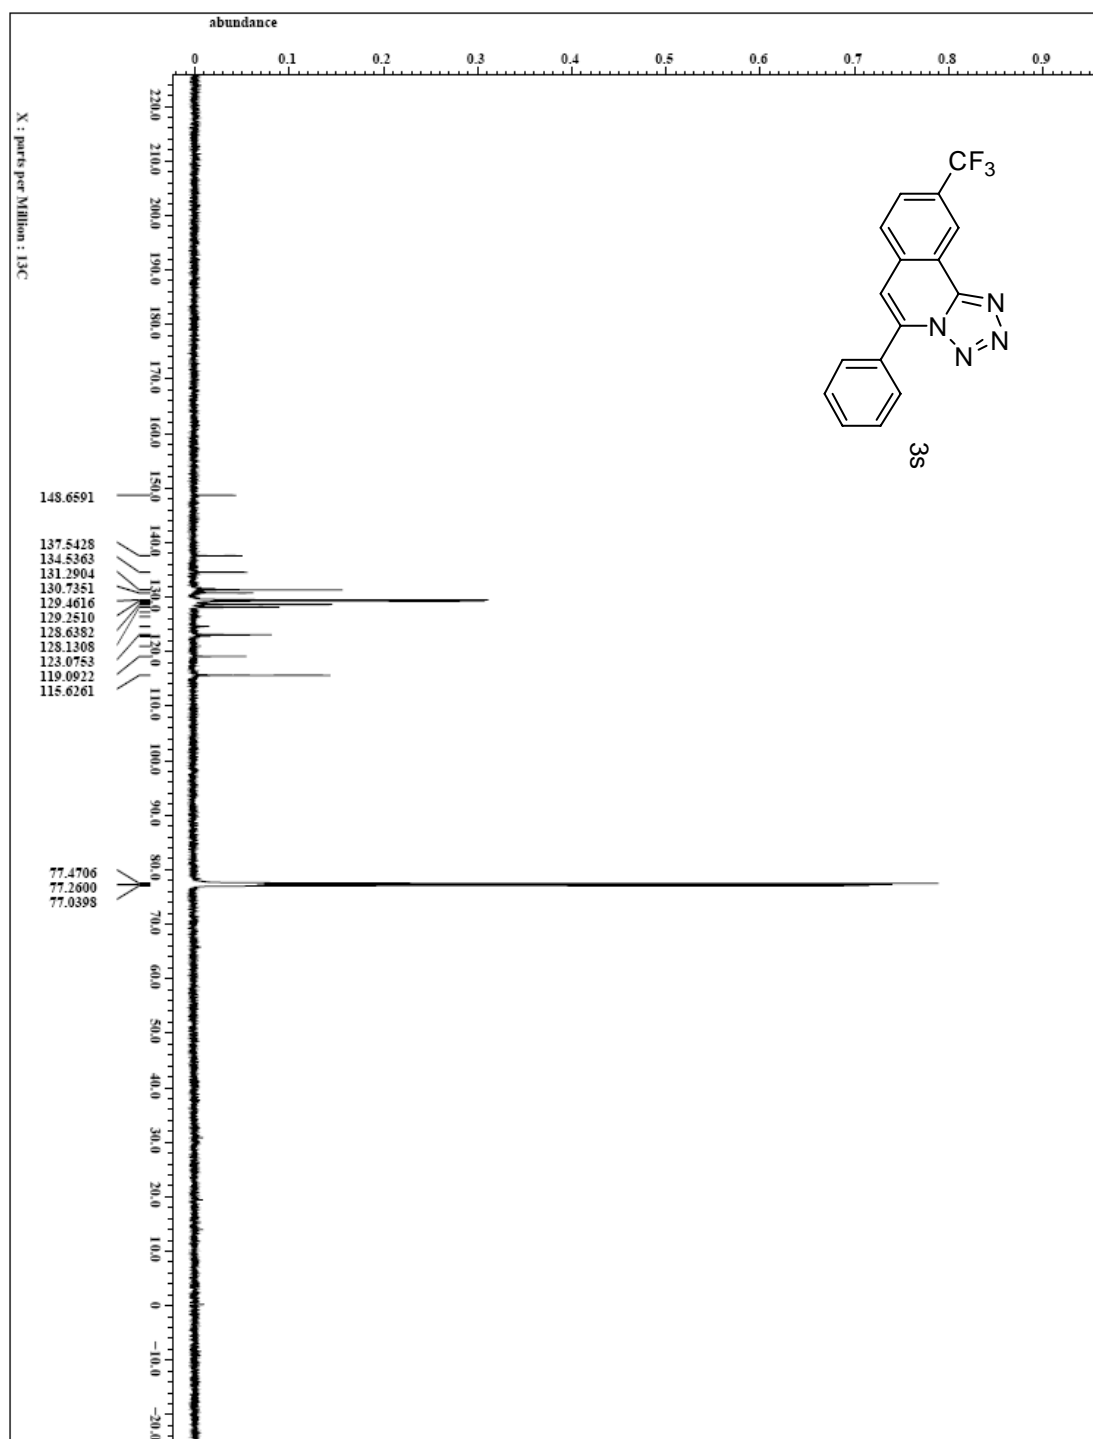

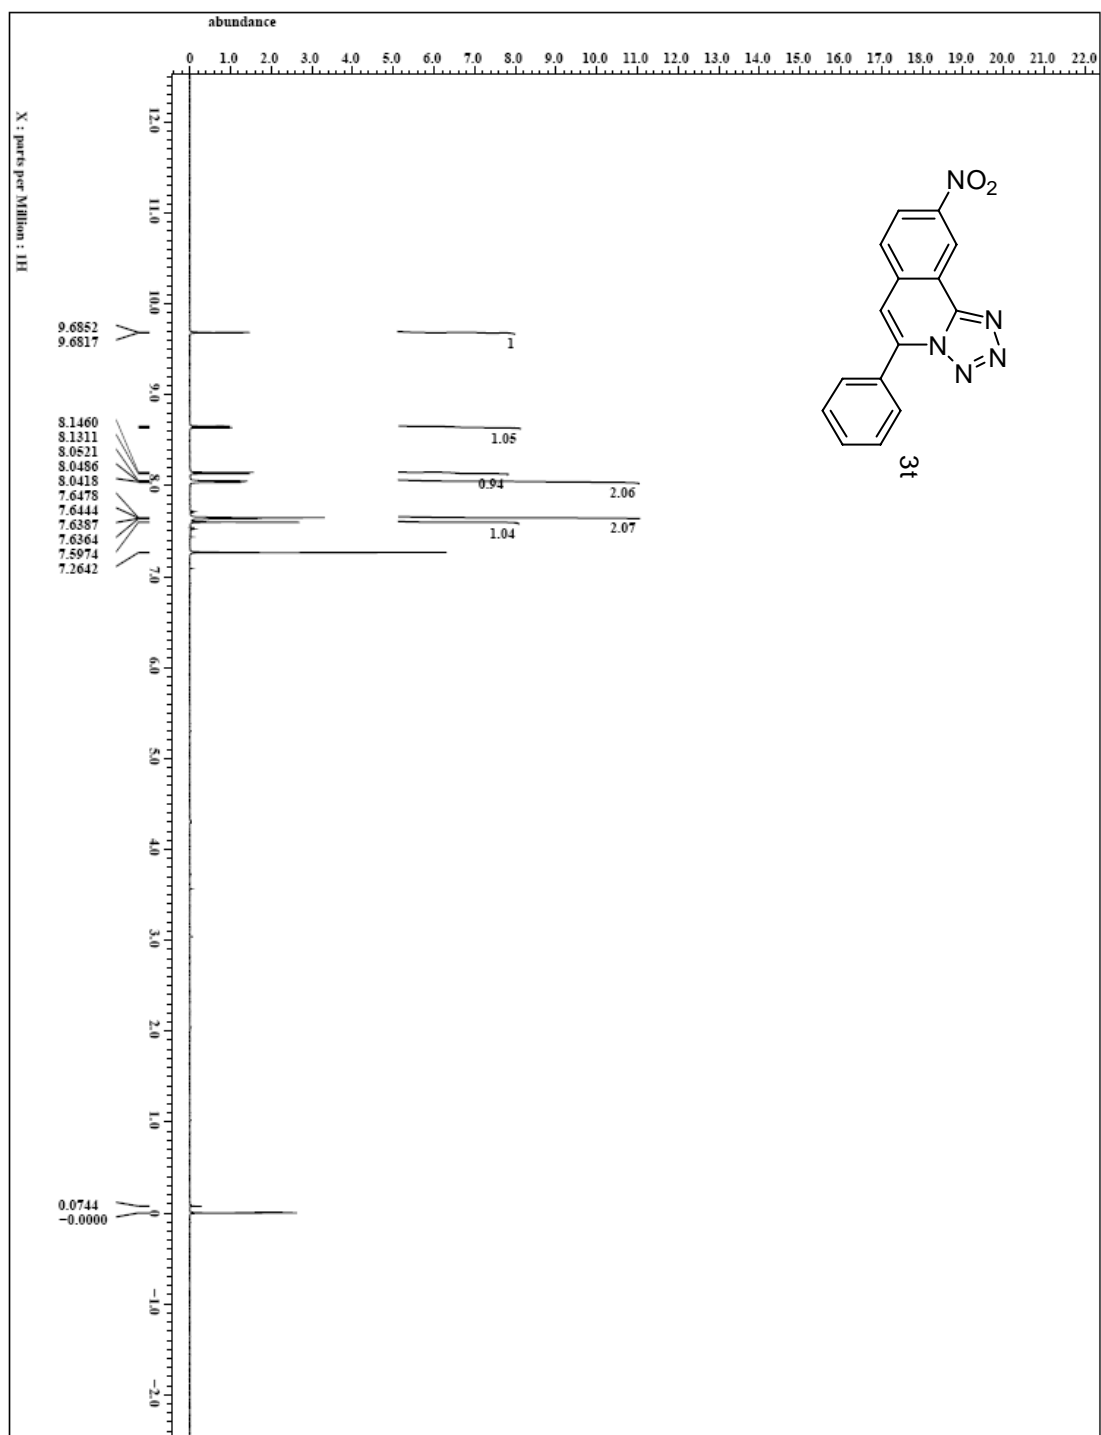

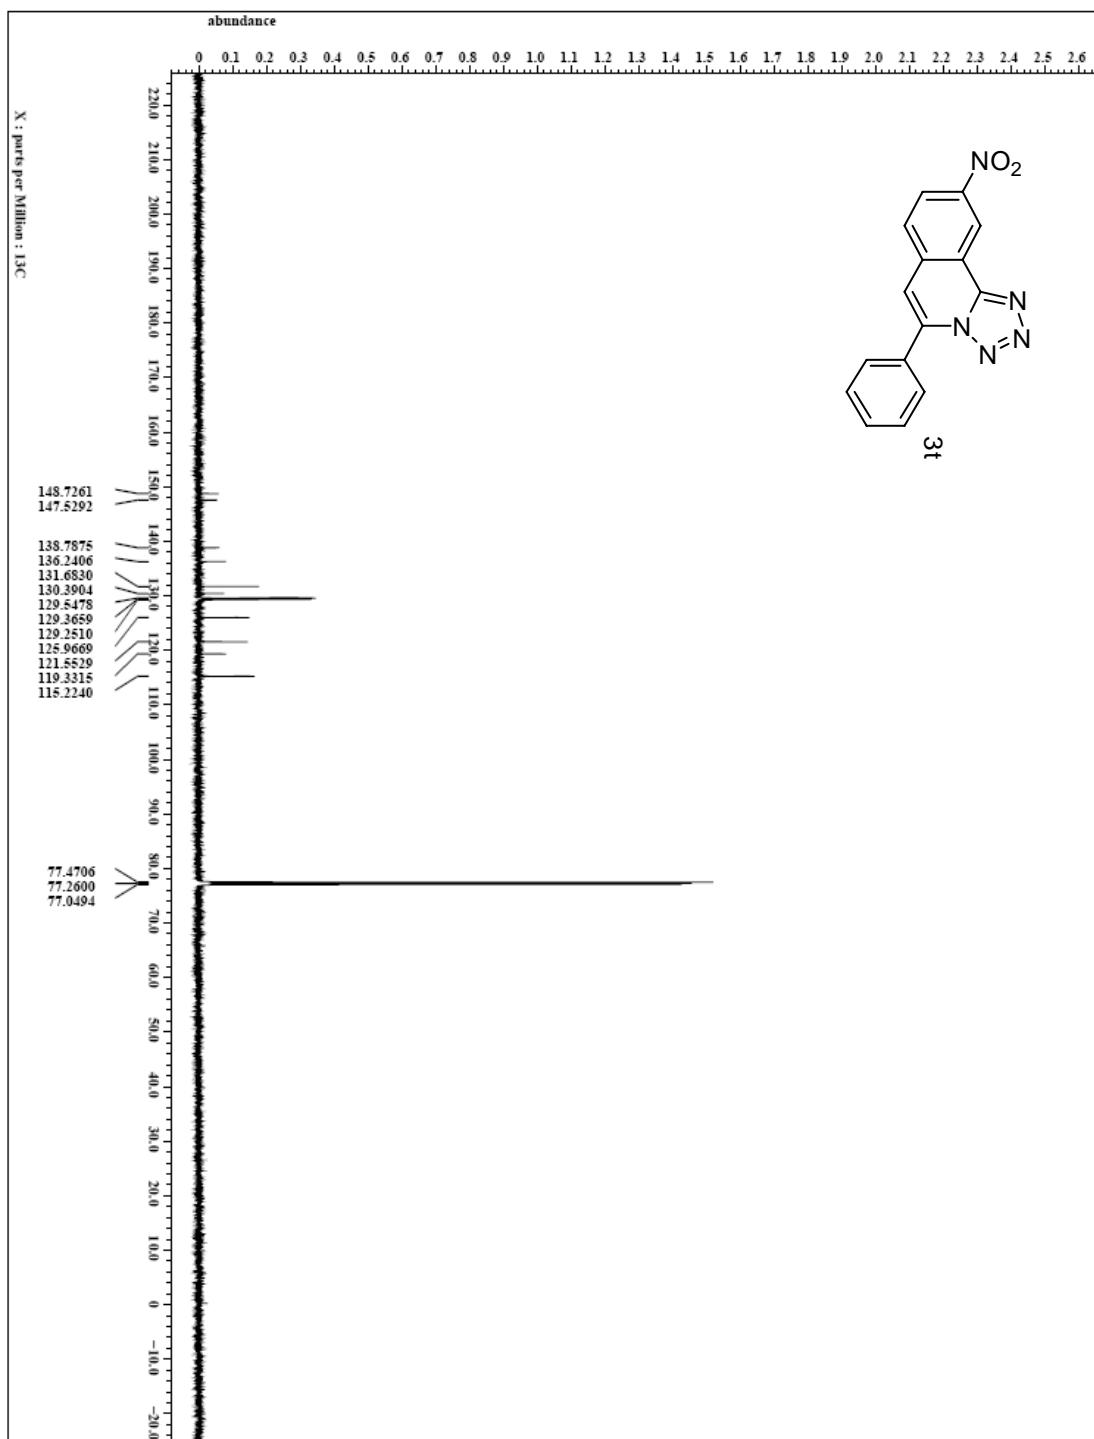

Supplement: c3ra23230a.pdf [file c3ra23230a.pdf]
